1  
2  
3  
4  
5  
6  
7  
8  
9  
11  
12  
13  
14  
15  
16  
17  
18  
19  
20  
21  
22  
23

**Comparative analysis of gene expression in virulent and attenuated strains of infectious  
bronchitis virus at sub-codon resolution**

Adam M. Dinan<sup>1</sup>, Sarah Keep<sup>2</sup>, Erica Bickerton<sup>2</sup>, Paul Britton<sup>2</sup>, Andrew E. Firth<sup>1</sup> and Ian Brierley<sup>1†</sup>

<sup>1</sup>Division of Virology, Department of Pathology, University of Cambridge, Tennis Court Road,  
Cambridge, CB2 1QP, U.K. <sup>2</sup>The Pirbright Institute, Woking, Surrey, GU24 0NF, U.K.

Running Title: Ribosome profiling of coronavirus IBV infection.

<sup>†</sup>Corresponding author: IB: Tel: +44 1223 336914, Fax: +44 1223 336926

Electronic Mail: [ib103@cam.ac.uk](mailto:ib103@cam.ac.uk)

Keywords: avian coronavirus, ribosome profiling, RNA virus, RNASeq, translation, differential  
gene expression

## 24 **ABSTRACT**

25 Infectious bronchitis virus (IBV) is a member of the genus *Gammacoronavirus* and the causative  
26 agent of avian infectious bronchitis. IBV has a single-stranded, positive-sense RNA genome ~27 kb  
27 in length and, like all coronaviruses, produces a set of sub-genomic messenger RNAs (sgmRNAs)  
28 synthesised via the viral polymerase. Here, we used RNA sequencing (RNASeq) and ribosome  
29 profiling (RiboSeq) to delineate gene expression in the IBV M41-CK and Beau-CK strains at sub-  
30 codon resolution. Quantification of reads flanking the programmed ribosomal frameshifting (PRF)  
31 signal at the genomic RNA ORF1a/ORF1b junction revealed that PRF in IBV is highly efficient  
32 (33–40%), consistent with *in vitro* measurements. Triplet phasing of the profiling data allowed  
33 precise determination of reading frames and revealed the translation of two intergenic genes (4b and  
34 4c on sgmRNA4), which are widely conserved across IBV isolates. RNASeq revealed two novel  
35 transcription junction sites in the attenuated Beau-CK strain, one of which would generate a  
36 sgmRNA encoding a ribosomally occupied ORF in the viral 3' untranslated region (dORF). Within  
37 IBV transcripts, the nucleocapsid (N) protein was unexpectedly found to be inefficiently translated,  
38 despite being an abundant structural component of mature IBV virions. Finally, we demonstrate that  
39 the host cell response to IBV occurs primarily at the level of transcription, with a global up-  
40 regulation of immune-related mRNA transcripts following infection, and comparatively modest  
41 changes in the translation efficiencies of host genes.

42

## 43 **IMPORTANCE**

44 IBV is a major avian pathogen and presents a substantial economic burden to the poultry industry.  
45 Improved vaccination strategies are urgently needed to curb the global spread of this pathogen, and  
46 the development of suitable vaccine candidates will be aided by an improved understanding of IBV

47 molecular biology. Our high-resolution data have enabled a precise study of transcription and  
48 translation in both pathogenic and attenuated forms of IBV, and expand our understanding of  
49 gammacoronaviral gene expression. We demonstrate that gene expression shows considerable intra-  
50 species variation, with single nucleotide polymorphisms associated with altered production of  
51 sgmRNA transcripts, and our RiboSeq data sets enabled us to uncover novel ribosomally occupied  
52 ORFs in both strains. We also identify numerous cellular genes and gene networks that are  
53 differentially expressed during virus infection, giving insights into the host cell response to IBV  
54 infection.

55

56

## 57 INTRODUCTION

58 Avian infectious bronchitis virus (IBV) is a member of the genus *Gammacoronavirus* (order  
59 *Nidovirales*) and a pathogen of the domestic fowl (Cavanagh, 2005). IBV infects primarily the  
60 epithelial cells of upper and lower respiratory tract tissues, though infections can also spread to the  
61 alimentary canal, as well as to the kidneys, testes and oviduct (Cavanagh, 2007). The monopartite,  
62 polycistronic genomic RNA (gRNA) of IBV is approximately 28 kb in length, and – like those of  
63 other coronaviruses – it is 5'-methyl-capped and 3'-polyadenylated (Gorbalenya et al., 2006). Two  
64 large open reading frames (ORFs) – ORF1a and ORF1b – are situated within the 5'-proximal two-  
65 thirds of the genome. Translation of the former yields a *ca.* 3,950-aa polyprotein (pp1a); whereas  
66 translation of the latter requires –1 programmed ribosomal frameshifting (PRF) (Brierley et al.,  
67 1987; 1989) giving rise to a *ca.* 6,630-aa polyprotein (pp1ab). These polyproteins are cleaved to  
68 yield the components of the membrane-bound replication-transcription complex (RTC) (Liu et al.,  
69 1997; Brockway et al., 2003; Sawicki et al., 2007). A feature of coronavirus replication is the  
70 synthesis of a nested, 3'-coterminal set of subgenomic mRNAs (sgmRNAs) encoding the viral  
71 structural and accessory proteins. The 5' end of each sgmRNA comprises a 56-nt sequence derived  
72 from the 5' end of the genome, the so-called leader sequence (Brown et al., 1986; Sawicki and  
73 Sawicki, 1995). Incorporation of the leader occurs as a result of "polymerase hopping" – or  
74 discontinuous transcription – during negative-strand synthesis. When the RTC encounters specific  
75 “body transcription regulatory sequences” (TRS-Bs), the nascent negative strand can re-pair with a  
76 closely homologous leader TRS (TRS-L) at the 3' end of the leader, after which the viral  
77 polymerase completes negative-strand synthesis using the leader as template (**Fig. 1A**; diamond  
78 symbols) (Brown et al., 1986; Sawicki and Sawicki, 1995, 1998; Pasternak et al., 2001; Zuniga et  
79 al., 2004; Sola et al., 2005; Sawicki et al., 2007). Subsequently, the RTC synthesises positive-strand  
80 copies of the negative-strand genomic and sgmRNAs.

81 Amongst the best-characterised strains of IBV are those belonging to the Massachusetts serotype,  
82 which includes the virulent Massachusetts 41 (M41; Van Roekel et al., 1951) isolate and the  
83 laboratory-attenuated Beaudette variant (Beaudette and Hudson, 1937). Whilst M41 is restricted to  
84 growth in primary chicken cells, Beaudette is capable of replicating in both avian and non-avian cell  
85 lines; including Vero (African green monkey kidney-derived) and baby hamster kidney (BHK) cells  
86 (Cunningham et al., 1972; Otsuki et al., 1979; Alonso-Caplan et al., 1984; Casais et al., 2003).  
87 Polymorphisms in the spike (S) glycoprotein subunit 2 (S2), which spans the viral membrane, have  
88 been shown to be responsible for this variation in host cell tropism (Bickerton et al., 2018).  
89 Moreover, the S protein of M41 – but not that of Beaudette – elicits an immunoprotective response  
90 *in vivo*; although recombinant transfer of the protein from the former to the latter does not restore  
91 pathogenicity (Hodgson et al., 1984). The extent to which these strains diverge in terms of virus  
92 gene expression, or in terms of host cell gene expression in response to infection, has not been  
93 investigated in detail.

94 The advent of high-throughput sequencing techniques offers a means to monitor viral gene  
95 expression at unprecedented resolution (Ingolia et al., 2009; Stern-Ginossar, 2015; Irigoyen et al.,  
96 2016; 2018; Stewart et al., 2018). Here, we performed deep sequencing of ribosome-protected  
97 fragments (RPFs) – known as RiboSeq – in tandem with whole transcriptome sequencing  
98 (RNASeq), on total RNA extracts from primary chicken kidney (CK) cells infected with Beaudette  
99 and M41 strains of IBV.

100

## 101 **RESULTS**

### 102 **RiboSeq and RNASeq Data Quality**

103 RiboSeq and RNASeq libraries were prepared from two biological repeats each of Beau-CK-  
104 infected, M41-CK-infected, and mock-infected cells. An average of 1,156,819 RPFs and 1,727,024  
105 RNASeq reads were mapped to viral gRNA in the virus-infected RiboSeq libraries (**Supp. Table**  
106 **S1**). The RNASeq read coverage in the library derived from the second biological repeat of M41-  
107 CK-infected cells was lower than that of other libraries due to technical losses. However, 106,741  
108 reads were mapped to the forward strand of the viral gRNA in this case – corresponding to a  
109 coverage of approximately 3.8-fold – and these reads were generally evenly distributed along the  
110 gRNA; hence, the sequencing depth in this replicate was deemed sufficient for further analysis. The  
111 vast majority of RPFs mapping to viral and host protein-coding regions were between 27 and 29 nt  
112 in length (**Supp. Fig. S1**), consistent with the size of the RNA fragment protected by translating  
113 eukaryotic ribosomes from digestion by RNase I (Wolin and Walter, 1988). The length distributions  
114 of RNASeq reads were much broader, in line with the size of the gel slice excised for sequencing of  
115 fragmented RNA. RPF length was strongly related to the RPF phase relative to the reading frame of  
116 the associated coding region: 27-nt RPFs were primarily in the +1 phase; whereas 28- and 29-nt  
117 RPFs were primarily in the 0 phase (**Supp. Fig. S2**). As expected, RNASeq reads were far more  
118 evenly split over the three phases, with a slight bias towards phase 0 (**Supp. Fig. S3**), which may  
119 reflect codon usage bias – such as a preference for the use of RNY codons (Jukes, 1996; Fuchs et  
120 al., 2015; Irigoyen et al., 2016) – compounded with adaptor-ligation bias during library preparation.  
121 A meta analysis of host mRNA coding regions showed that the depth of coverage of RiboSeq 5'  
122 read ends increased substantially 12 nt upstream of the AUG (initiation) codon for RPFs in phase 0  
123 (generally 28- and 29-nt RPFs), and 11-nt upstream of the AUG codon for RPFs in phase +1  
124 (generally 27-nt RPFs) (**Supp. Figs. S4 and S5**). This indicates that the ribosomal P-site is situated  
125 at an offset of 11 and 12 nt from the 5' ends of RPFs for 27-nt and 28-/29-nt reads, respectively  
126 (Ingolia et al., 2011). Peaks in RNASeq 5'-read end coverage were seen at the A of initiation (AUG)

127 codons and at the middle nucleotide of termination (UNN) codons, respectively (**Supp. Figs. S6**  
128 **and S7**), and are considered an artefact of ligation bias.

129

130 **Fig. 1** illustrates the RiboSeq (red) and RNASeq (green) read coverage of the Beaudette (**panel A**)  
131 and M41 (**panel B**) genomes. In both cases, the density of RPFs was considerably higher towards  
132 the 3' ends of the gRNA, consistent with production of the 3' co-terminal nested set of sgmRNAs.  
133 In contrast, RiboSeq coverage of the ORF1a and ORF1b coding sequences was relatively low;  
134 reflecting the fact that a substantial proportion of newly synthesised gRNA (but not sgmRNA)  
135 transcripts are likely to be destined for packaging rather than translation (Kuo and Masters, 2013).  
136 On average, negative-sense RNASeq reads were present at 0.28% of the level of positive-sense  
137 reads on average, indicating a ratio of positive:negative stranded RNA of ~350:1 at 24 h p.i., a ratio  
138 similar to that seen in ribosome profiling studies of the betacoronavirus mouse hepatitis virus  
139 (MHV) (Irigoyen et al., 2016). Negative-sense RPFs, which may represent contamination from  
140 ribonucleoprotein complexes (Irigoyen et al., 2016), were observed but at low abundance (0.03% of  
141 the level of positive-sense RPFs).

142

#### 143 **Virus transcription: sequence divergence associated with IBV strain-specific TRS usage**

144 The density of RNASeq reads mapping to a given sgmRNA represents the cumulative sum of reads  
145 derived from the gRNA and those derived from the overlapping portions of other subgenomic  
146 transcripts (**Fig. 1**). Therefore, to estimate the abundance of individual sgmRNAs, two independent  
147 approaches were used. First, we “decumulated” the raw RNASeq read densities mapping to inter-  
148 TRS regions, by subtracting the density of the 5'-adjacent inter-TRS region in each case (Irigoyen et  
149 al., 2016). Secondly, the abundances of chimeric RNASeq reads spanning TRS junctions were

150 quantified, by identifying unmapped reads containing an 11-nt sequence derived from the leader  
151 region, 5'-adjacent to the TRS-L (UAGAUUUUUAA, nt 46 – 56 in Beaudette; UAGAUUUCCAA,  
152 nt 46 – 56 in M41), and including at least 16 nt 3' of this query. Chimeric reads were assigned to  
153 specific genomic loci based on the sequences 3' of the TRS in each case (**Supp. Table S2; Fig. 2A**).  
154 Overall, the chimeric read abundances for sgmRNAs were significantly correlated with the  
155 corresponding decumulated RNASeq densities ( $P < 0.01$  in both cases) (**Supp. Fig. S8**). The  
156 sequence logos in **Fig. 2B** and **Fig. 2C** illustrate the diversity of nucleotides found at TRS-B sites  
157 identified in this study (including the novel sites discussed below) in Beaudette and M41,  
158 respectively. The core region of similarity to the TRS-L motif (CUUAACAA) is typically flanked  
159 by a 3' adenine (A) or uracil (U) residue, and a preference for A/U residues is also seen immediately  
160 upstream of the core sequence. These flanking residues may facilitate template switching by  
161 lowering the free energy of anti-TRS-B/TRS-B duplex disassociation, since the TRS-L is also  
162 located in an AU-rich region (Sola et al., 2005).

163 Notably, the A nucleotides at positions four and seven of the core motif are the only invariant  
164 residues. In both Beaudette and M41, the TRS-B sequences associated with the S gene contain G  
165 residues at the third positions (CUGAACAA); in contrast to the TRS-L, which has a U at this  
166 position (CUUAACAA) (**Supp. Table S2**). Chimeric reads assigned to this gene were found to  
167 contain either a U or a G residue at position three (denoted “S [U3]” and “S [G3]”, respectively, in  
168 **Fig. 2A; Supp. Table S2**); with a G being more common in M41 (7.5% of reads compared with  
169 5.8%, on average) and a U being more common in Beaudette (2.1% of reads compared with 1.5%,  
170 on average) (**Supp. Table S2**). These data indicate that the exact position at which discontinuous  
171 transcription occurs within a given TRS is subject to some variation, with either the TRS-L or the  
172 TRS-B templating the third residue. Similarly, the TRS-B for the 3a/3b/E genes diverges at the third  
173 position between Beaudette (CUGAACAA; nt 23825 – 23832) and M41 (CUUAACAA; nt 23832 –



174 23839), with the latter matching the TRS-L sequence exactly. In this case, we found that Beaudette-  
175 derived chimeric reads could contain either a U (denoted “3/E [U3]”) or a G (denoted “3/E [G3]”),  
176 with the G residue being slightly more common (1.6% versus 1.2%, respectively, on average);  
177 whereas M41-derived reads contained only the U residue (**Fig. 2A; Supp. Table S2**).

178 In agreement with a previous report (Stirrup et al., 2000), we found that the 3'-most of two  
179 adjacent canonical TRS-B sequences (both CUUAACAA; nt 25,460 – 25,467 and nt 25,471 –  
180 25,478, labelled “5a/5b TRS 1” and “5a/5b TRS 2”, respectively, in **Fig. 2A**) within the 30-nt region  
181 upstream of genes 5a/5b was preferentially utilised in IBV Beaudette; accounting for 18.8% of  
182 chimeric reads on average, compared with 1.5% for the 5'-most TRS-B. Interestingly, more  
183 chimeric reads were assigned to the non-canonical TRS-B associated with genes 4b/4c (Bentley et  
184 al., 2013) – which has a low homology to the TRS-L (**Supp. Table S2**) – than to the first of these  
185 5a/5b-associated TRSs in IBV Beaudette; emphasising the importance of the genomic context in  
186 facilitating discontinuous transcription (**Fig. 2B** and **Fig. 2C**) (Sola et al., 2005). Only one of the  
187 two 5a/5b TRSs (TRS 2) is found in the IBV M41 genome (**Fig. 2A**).

188

### 189 **Novel TRS in IBV Beaudette**

190 Two additional non-canonical leader/body chimeras were identified, both specific to the Beaudette  
191 strain (**Supp. Table S2**). The more abundant of these (0.6% of chimeric reads) mapped to a position  
192 immediately downstream of the IBV Beaudette N gene termination codon, within the 3'  
193 “untranslated” region (UTR). Chimeric reads derived from this site contained the sequence  
194 CUUAACAU; the last six nt of which could have been templated by the genomic (TRS-B)  
195 sequence (UAACAU, nt 27104 – 27109). There is an AUG-initiated downstream ORF (dORF) in  
196 Beaudette beginning two nt 3' of this TRS, which comprises 11 codons (nt 27111 – nt 27143).

197 Inspection of our RiboSeq libraries shows that the dORF is ribosomally occupied (**Fig. 2D**). Such  
198 AUG-initiated dORFs are present immediately 3' of the N genes in most IBV strains, and in TCoV,  
199 but this region appears to have been ancestrally deleted in the IBV M41 lineage; and M41 also lacks  
200 the TRS-B downstream of the N gene (UAAAAU, nt 27156 – 27161).

201 The second novel chimeric sequence identified in RNASeq libraries maps to a TRS-B  
202 (CUUACCAA) within the coding region of the S gene in Beaudette (nt 21242 – 21249). This is  
203 consistent with the previous detection of a sgRNA of appropriate length via Northern blot analysis  
204 (Bentley et al., 2013). Whilst the core sequence of the TRS-B in this case is conserved in M41,  
205 there is a single nucleotide (A to C) polymorphism located four nt downstream in the 3' flanking  
206 region, which may contribute to its lack of utilisation in this strain (**Supp. Table S2**).

207

#### 208 **Virus translation: direct measurement of –1 PRF between ORF1a and ORF1b**

209 Ribosome profiling of eukaryotic systems typically has the characteristic that mappings of the 5'  
210 end positions of RPFs to coding sequences reflect the triplet periodicity of genetic decoding. A clear  
211 phase transition is evident in the RiboSeq libraries at the junction of ORF1a and ORF1b; where  
212 frameshifting of a proportion of ribosomes from the former ORF into the latter occurs (**Fig. 3A and**  
213 **3B**). The mean normalised ratios of ORF1b to ORF1a RiboSeq density were 0.32 and 0.37 in IBV  
214 Beaudette and IBV M41, respectively; while the corresponding RNASeq ratios were 0.97 and 0.94,  
215 respectively (**Fig. 3C**). Thus on average, 33% of ribosomes in Beaudette and 39% in M41 undergo  
216 –1 PRF prior to reaching the ORF1a termination codon (**Fig. 3D**). These values are very similar to  
217 those measured in *in vitro* PRF assays (Brierley et al., 1987, 1989) and alongside related profiling  
218 studies of MHV (Irigoyen et al., 2016), this indicates that coronaviruses exhibit highly efficient PRF  
219 both *in vitro* and in the context of the infected cell.

220

## 221 **Ribosomal occupancy of ORF4b and ORF4c**

222 Situated between the M and 5a genes in Beaudette and M41 is a >300-nt ostensibly “intergenic”  
223 region (IGR) (**Fig. 1**). No protein-coding genes are annotated here but two putative AUG-initiated  
224 ORFs are present in each virus, referred to as ORF4b and ORF4c, after their homologs in turkey  
225 coronavirus [TCoV] (Gomaa et al., 2008; Cao et al., 2008) and in the genomes of most IBV isolates  
226 (Reddy et al., 2015). The putative ORF4b genes of Beaudette and M41 are encoded by nt 25,183 –  
227 25,335 (50 codons) and nt 25,190 – 25,474 (94 codons), respectively, of the gRNA; whereas the  
228 ORF4c genes are encoded by nt 25,339 – 25,422 (27 codons) and nt 25,395 – 25,457 (20 codons),  
229 respectively (**Supp. Fig. S9**). Thus, in Beaudette, the two ORFs are separated by a 3-nt spacer  
230 region and in the same reading frame (**Fig. 4A**); whereas in M41, ORF4c is located entirely within  
231 the ORF4b gene and in the +1 phase (**Fig. 4B**). Inspection of the ribosomal profiling datasets  
232 reveals substantial RPF coverage of both ORF4b and ORF4c, providing the first clear illustration  
233 that ORFs 4b and 4c are ribosomally occupied (**Fig. 4**). Visualisation of ORF4c translation in M41  
234 was facilitated by good phasing in the datasets, allowing expression of both ORF4b and ORF4c to  
235 be visualised (as both blue and orange RPF peaks in the overlap region). Previous work (Bentley et  
236 al., 2013) has shown that a non-canonical TRS-B sequence – situated approximately 100 nt  
237 upstream of the M gene termination codon – facilitates production of a sgRNA that harbours  
238 ORF4b at its 5' end, and this TRS-B was also identified in our RNASeq data.

239

## 240 **Translation efficiencies of IBV genes**

241 To estimate the translational efficiency (TE) of virus genes, we summed RPFs whose 5' end mapped  
242 in-phase between the first nucleotide of the initiation codon and 30 nt 5' of the termination codon;

243 thereby excluding RPFs derived from ribosomes paused during initiation or termination (Irigoyen et  
244 al., 2016). The TE of each ORF was measured as the quotient of the RPF density and the abundance  
245 of the corresponding mRNA; with separate calculations performed using the decumulated RNASeq  
246 densities and the TRS chimeric reads counts (**Fig. 5** and **Supp. Fig. S10**, respectively). In the case  
247 of ORF4b and ORF4c, transcript abundance could not be accurately deduced via the RNASeq  
248 decumulation procedure, because the significantly lower level of expression of the 4b/4c transcript  
249 relative to that of the 5'-adjacent M gene (**Fig. 1**) was associated with a proportionate increase in the  
250 level of noise. Similarly, as a result of the high abundance of gRNA relative to the sgRNA  
251 encoding S, the decumulated RNASeq density for the latter is likely to be poorly estimated, and  
252 therefore the TE value for S calculated using the chimeric read count is likely to be more accurate.  
253 From this analysis, it was observed that the 4b gene is more efficiently translated than the 4c gene; a  
254 trend also observed for the accessory genes 3a/3b and 5a/5b (**Fig. 5**). This is consistent with the  
255 likely requirement for leaky scanning to access the downstream ORF on each sgRNA (see  
256 Discussion). Surprisingly, despite the fact that the nucleocapsid (N) protein is an abundant viral  
257 protein, it was not found to be efficiently translated relative to the other structural proteins,  
258 regardless of the approach used to estimate transcript abundance (**Fig. 5; Supp. Fig. S10**). In the  
259 case of the ORF1a and ORF1b genes, a large proportion of the genomic RNA is expected to be  
260 destined for packaging rather than translation, as mentioned above, and this probably explains the  
261 low TE values calculated for these genes (**Fig. 5; Supp. Fig. S10**). Additionally, the short length of  
262 the dORF precluded an accurate assessment of its translation efficiency.

263

264 **Ribosomal pauses during IBV genome translation**

265 Inspection of the profiling datasets revealed a number of genomic locations where RPFs  
266 accumulated to a much higher level than at neighbouring sites, indicative of ribosomal pausing. As  
267 such pauses may have biological significance, we first sought to discount those that may have arisen  
268 artefactually. The known translation initiation sites in the virus genome generally showed high  
269 ribosome occupancy, but as the infected cells were treated with cycloheximide (CHX) prior to lysis  
270 to “freeze” ribosomes onto the mRNA, these pauses are likely to be over-represented, as ribosomes  
271 can accumulate at start codons during the CHX treatment period (Ingolia et al., 2011). Fluctuations  
272 in RPF density can also occur as a result of nuclease, ligation, and PCR biases during library  
273 construction. As the latter two biases can also occur during RNASeq library generation, we also  
274 discounted any pauses that had an obvious counterpart in RNASeq datasets. With these criteria, we  
275 identified five obvious sites of ribosomal pausing conserved in Beaudette and M41, one in the 5’  
276 UTR and four within the coding region (indicated in **Fig. 1**, purple triangles; see **Table 1**). Pauses in  
277 5’ UTRs can represent ribosomes initiating at upstream ORFs (uORFs), although in both Beaudette  
278 and M41, the P-site of the ribosome paused over bases 28–56 in the 5’ UTR of the genome is on a  
279 non-AUG codon (UUG) in a weak Kozak initiation consensus. As this pause is located upstream of  
280 the TRS\_L, it reflects the sum of pausing on all sgmRNAs. To view the extent of the pause in  
281 context, we remapped reads to the most abundant sgmRNA, i.e. that of the N gene (**Fig. 6**). As can  
282 be seen, the “Leader pause” remains clearly evident (as is a smaller pause three codons  
283 downstream), albeit smaller in magnitude than those pauses seen at an N uORF (see below) and the  
284 authentic AUG codon of the N protein. Initiation at the UUG codon would result in translation of  
285 solely a dipeptide and thus the pause, if biologically relevant, may act as a regulator of downstream  
286 initiation events rather than through the encoded product. We note that an equivalent Leader pause  
287 is seen in MHV (UUG codon, 1-codon ORF; Irigoyen et al., 2016). It is possible that pausing at this  
288 codon is potentiated by queueing of initiating ribosomes on sgmRNAs. The origin of the pauses

289 within the coding region are enigmatic. The two adjacent pauses referred to collectively as Pause 2  
290 in **Table 1** correspond to translation of a region of non-structural protein 4 (nsP4) downstream of  
291 the membrane spanning domains (Oostrá et al., 2007; Doyle et al., 2018). It is feasible that  
292 ribosomes pause here whilst the nascent peptide is being folded into membranes. Pauses 3 and 4 are  
293 noticeably large and correspond to ribosomes pausing soon after initiation of the S and M proteins,  
294 respectively. In the case of the former, the pause appears to be unrelated to the signal sequence at  
295 the N-terminus of the S protein, since this would still be within the peptide exit tunnel of paused  
296 ribosomes. Pause 5 corresponds to a potential non-AUG uORF (AUU, in a reasonable context)  
297 within the N mRNA (**Fig. 6**).

298

299 It is noteworthy that in our analysis of ribosomal pause sites, we did not see pausing at the AUG of  
300 the previously described 11 amino acid uORF of the genomic mRNA (AUG at nt 131–133;  
301 Bournsnell et al., 1987), and indeed there were few reads on the uORF itself, indicating that it is not  
302 heavily translated. Further, no pausing was observed at the PRF site at the ORF1a/ORF1b overlap.

303

#### 304 **Differential expression of host genes in response to IBV infection**

305 We investigated the differential transcription and translation of host genes in response to IBV  
306 infection by comparing RNA and RPF densities per coding region for infected samples and mocks  
307 (see Materials and Methods). Details of the genes found to be differentially expressed (DEGs)  
308 (FDR < 0.05 with multiple testing correction using the Benjamini-Hochberg method) at the level of  
309 transcription (4,266 genes) or translation (3,627 genes) respectively, are provided in **Supp. Data**  
310 **Sets S1 and S2**. Overall, the patterns of change in host cell gene expression in response to infection  
311 were broadly similar for Beaudette and M41, with positive inter-strain correlations in the log<sub>2</sub> fold  
312 changes (log<sub>2</sub>FC) in transcript abundance and translation efficiency ( $R^2 = 0.95$  and  $R^2 = 0.85$ ,

313 respectively,  $P$  values both  $< 2.2 \times 10^{-16}$ ; **Fig. 7A**). Notably, the majority of differentially  
314 transcribed genes were up-regulated rather than down-regulated (i.e.  $\log_2FC > 0$ ) for both strains  
315 (**Fig. 7A; left panel**), with 2.1-fold and 3.5-fold more up-regulated compared with down-regulated  
316 transcripts (FDR  $< 0.05$ ; see Materials and Methods) detected in Beau-CK-infected cells and M41-  
317 CK-infected cells, respectively (**Supp. Data Set S1**). This effect was not seen at the level of  
318 translation, where there were fewer differentially expressed genes overall, and the  $\log_2FC$  values of  
319 those genes were more evenly distributed around 0, with slight skewing towards negative values  
320 (i.e. reduced TE) (**Fig. 7A; right panel** and **Supp. Data Set S2**). The core host transcriptional  
321 response to the two strains involved 579 commonly up-regulated and 132 commonly down-  
322 regulated genes, while the core translational response consisted of 34 commonly up-regulated and  
323 79 commonly down-regulated genes. Gene ontology (GO) term enrichment revealed that numerous  
324 immune-related pathways were among the most significantly enriched terms in the core response  
325 sets (**Fig. 7B** and **Fig. 7C**). There was also evidence of integration and coordination of responses at  
326 the transcriptional and translational levels. For example, the GO term “positive regulation of NF-  
327 kappaB transcription factor activity” (GO:0051092) was enriched among transcriptionally up-  
328 regulated genes; whereas “negative regulation of NF-kappaB transcription factor activity”  
329 (GO:0032088) was enriched among translationally down-regulated genes. In a direct inter-strain  
330 comparison of statistically significant DEGs we identified 51 differentially transcribed genes, 45 of  
331 which were more highly expressed in Beaudette-infected samples, and six of which were more  
332 highly expressed in M41-infected samples (**Supp. Data Set S1**). The most significantly enriched  
333 GO term in the former set was “regulation of signaling receptor activity” (GO:0010469); while pro-  
334 proliferative and anti-apoptotic GO terms were also enriched (**Supp. Table S3**). The latter set  
335 included three heat shock protein-encoding genes, and consequently the top enriched GO terms  
336 were related to “protein refolding” (**Supp. Table S4**). Just one gene (ENSGALG00000015358

337 [MYH15], encoding myosin heavy chain 15) had a significantly higher translation efficiency in  
338 M41-infected samples compared with Beaudette-infected samples.

339 In comparisons of host gene expression between Beaudette-, M41- and mock-infected cells, the  
340 significantly differentially expressed genes (FDR <0.05) were ranked by log<sub>2</sub>FC (**Supp. Data Set**  
341 **S3**) and the top 100 DEGs (or fewer) within each category were subjected to STRING analysis  
342 (Szklarczyk et al., 2017) to identify potential protein-protein interaction pathways (**Fig. 8 and**  
343 **Supp. Fig. S11**). A selection of the key pathways proposed and examples of the associated genes  
344 are shown in **Table 2**. Clear patterns of host response to virus infection were present that are  
345 discussed below. Note in inter-strain comparisons of M41 versus Beaudette, only the  
346 transcriptionally downregulated category had sufficient gene candidates for STRING analysis; the  
347 other three categories had a total of only seven DEGs (thus no plots are shown in the **Supp. Info.**  
348 for these).

349

## 350 **Discussion**

351 Here, we describe the first high-resolution study of gammacoronaviral gene expression during  
352 infection of primary chick kidney cells. Analysis of RNASeq data sets through chimeric read  
353 analysis or decumulation allowed us to quantify the relative levels of viral genomic and subgenomic  
354 mRNAs and to define the sequence diversity of strain-specific TRS utilisation. The predominant  
355 sgRNA in both strains was that encoding the N protein, and between strains, the M transcript was  
356 relatively more abundant in M41. In Beaudette, two novel TRS were identified, one in the viral 3'  
357 UTR immediately downstream of the N gene termination codon, and one mapping to a TRS-B  
358 within the S gene. In the former, a short ORF (dORF) – initiated two nt 3' of the TRS – is present  
359 and ribosomally occupied. The potential biological relevance of this ORF remains to be determined;



360 such dORFs are present in most IBV strains and in TCoV, but it is lacking in M41 (as is the TRS-  
361 B). A recent report has described the same sgRNA (initiating at the identical TRS) as a novel non-  
362 coding RNA of IBV (An et al., 2019). The S gene TRS-B, proposed earlier (Bentley et al., 2013),  
363 was also identified.

364 RiboSeq analysis, in conjunction with RNASeq, revealed that the N protein is not more efficiently  
365 translated than other structural proteins, despite being a structural component of IBV virions.  
366 Coronaviral N proteins are highly basic, reflecting the fact that they associate tightly with the  
367 negatively charged gRNA (Laude et al., 1995), and a previous meta-analysis has indicated that the  
368 decoding of positively charged amino acid residues is associated with a lowering in the speed of  
369 translation (Charneski and Hurst 2013; Sabi & Tuller, 2015; Requiao et al., 2016). Thus, it is  
370 possible that the relatively low TE of N is an unavoidable consequence of its amino acid  
371 composition. N expression may also be regulated by a putative uORF whose initiation codon is  
372 located some 50 nt upstream of the N AUG codon (**Fig. 6**).

373

374 The efficiency of PRF at the IBV ORF1a/ORF1b overlap in natural infection was found to be 33–  
375 40%. This range is in close agreement with previous *in vitro* measurements of IBV frameshifting  
376 efficiency carried out using reporter constructs (Brierley et al., 1989) and is consistent with the  
377 notion that frameshifting in IBV is among the more efficient examples of canonical eukaryotic –1  
378 PRF signals that have been studied to date (Atkins et al., 2016; Irigoyen et al., 2016). Whether the  
379 modest difference in –1 PRF efficiency measured for Beau-CK and M41-CK has biological  
380 significance is uncertain, and it may represent experimental variation. The frameshift signal of  
381 M41-CK differs from Beau-CK in only three of 81 nucleotide positions, all of which are located in  
382 loop 3 of the stimulatory pseudoknot and not expected to affect pseudoknot function or stability

383 (Brierley and Pennell, 2001). As also described for MHV-infected cells (Irigoyen et al., 2016), there  
384 was no evidence that the frameshift-stimulatory pseudoknot induced ribosomal pausing on the  
385 slippery sequence. Thus pausing may not be a component of the frameshifting mechanism, or the  
386 pause may be too short-lived to be visualised by the profiling technique.

387

388 A meta-analysis of host genes revealed highly specific phasing of the RiboSeq data sets, enabling  
389 the accurate determination of the reading frame of translation for individual RPFs. Good phasing in  
390 the datasets and substantial read depth also allowed us to examine translation of viral accessory  
391 ORFs. It was evident that both 4b and 4c are efficiently translated, at levels comparable to those of  
392 the 5a/5b accessory protein-encoding genes. The mechanism by which ribosomes might access  
393 ORF4c, however, is not clear. Given the absence of AUG codons within the regions between the 5'  
394 ends of ORF4b and ORF4c in both Beaudette and M41 (**Supp. Fig. S9**), and the weak initiation  
395 context of the ORF4b start codon, it is possible that a proportion of ribosomes might bypass the  
396 ORF4b initiation codon and instead translate ORF4c via “leaky scanning” (Firth and Brierley,  
397 2012), although it should be noted that intervening AUG codons do exist in some other IBV strains  
398 (**Supp. Fig. S9**).

399

400 The relevance to virus gene expression of the sites of significant ribosomal pausing identified in the  
401 genome remains to be investigated experimentally. Two of these pause sites appear to correspond to  
402 uORFs initiated at non-AUG initiation codons, one in the 5' UTR and one upstream of the N gene.  
403 In each case, ribosomes initiating on the main ORF AUG (ORF1a and N respectively) could  
404 potentiate initiation on the uORFs through stacking of scanning ribosomes, and this could be  
405 artefactually increased by the cycloheximide pretreatment used during sample preparation. Two of

406 the other pause sites correspond to ribosomes paused post-initiation early in the coding regions of  
407 the S and M genes. A biological explanation for this is lacking at present. We are aware that the  
408 treatment of yeast cells with cycloheximide can lead to an early block in elongation in stressed cells  
409 (Gerashchenko and Gladyshev, 2014; Duncan and Mata, 2017), but meta-analysis of host genes in  
410 our infected cells does not reveal an obvious elongation block. Further, the S and M genes show  
411 deep ribosome coverage along their lengths, inconsistent with a block in elongation. The remaining  
412 pause site (in fact a doublet) appears during translation of the nsP4 region of the polyprotein close  
413 to the C-terminus of nsP4. Coronaviral nsP4 proteins are important for the membrane  
414 rearrangements required for viral RNA synthesis and contain multiple membrane spanning domains  
415 (Doyle et al., 2018). A possible explanation for the ribosomal pauses seen here is that translation is  
416 paused to permit the correct folding of nsP4 into membranes.

417

418 In general, the pauses we discern during translation of the IBV genome are discrete, substantial in  
419 terms of read counts, and reproducible. As mentioned above, their origin is uncertain, but it seems  
420 unrelated to the identity of the P-site tRNA. Recent studies have shown that P-site prolyl-tRNA is a  
421 strong determinant of ribosomal pausing, partly due to the slow rate of peptide bond formation with  
422 this amino acid (Sabi and Tuller, 2015; 2017). However, none of the stall sites identified here have  
423 proline tRNA in the P-site. One possible explanation we cannot rule out is that some feature of the  
424 nascent peptide engenders pausing through interactions with the ribosome exit tunnel or  
425 chaperones; clusters of positively-charged amino acid residues have been documented to induce  
426 ribosome pausing (Ingolia, 2014; Sabi and Tuller, 2017), although such clusters are not evident  
427 upstream of the pause sites seen here. The recent developments of methodologies and algorithms to  
428 identify and characterise ribosomal pause sites may clarify the situation in future (Chadani et al.,  
429 2016; Kumari et al., 2018).

430

431 Our data indicate that the host response to IBV is mediated primarily at the level of transcription,  
432 with the up-regulation of hundreds of genes, many of which have immune-related functions.  
433 Changes in translational efficiency were more modest, with more genes showing decreased rather  
434 than increased translation in response to IBV infection. Many of the transcriptionally upregulated  
435 genes identified reflect the host response to virus infection, as seen previously with IBV infection of  
436 chickens (Cong et al., 2013; Chhabra et al., 2018) and with other RNA viruses (Zhang et al., 2018).  
437 Some of the protein pathways identified have not been associated with coronavirus infection  
438 previously and warrant experimental follow up, for example, the potential downregulation of  
439 transcription of genes linked to FAM20C, a kinase that generates the majority of the extracellular  
440 phosphoproteome (Tagliabracchi et al., 2015). Also of interest is the translational upregulation of  
441 ribosomal protein synthesis in infected cells for both Beau-CK and M41-CK. A direct comparison  
442 of DEGs in M41-CK and Beau-CK-infected primary chick kidney cells did not identify any obvious  
443 pathways that would reflect their differential pathogenesis. Overall, these data contribute towards a  
444 substantially improved understanding of the early innate immune response to IBV infection,  
445 including distinct features of the transcriptional and translational responses.

446

## 447 **MATERIALS AND METHODS**

448 **Virus and cells:** The apathogenic molecular clone of IBV, Beau-R, has been described previously  
449 (Casais et al., 2001) and was used to generate virus Beau-CK. The pathogenic isolate M41-CK has  
450 been described previously (Kottier et al., 1995). Primary chick kidney (CK) cells were produced  
451 from 2–3 week-old specific pathogen free (SPF) Rhode Island Red chickens (Hennion and Hill,  
452 2015). CK cells ( $0.8 \times 10^6$  cells/ml) were plated in 10-cm dishes and upon reaching 100%

453 confluence (two days post-seeding) were washed once with PBS and infected with  $9.6 \times 10^6$  PFU  
454 Beau-CK or M41-CK. After 1 hour incubation at 37 °C, 5% CO<sub>2</sub>, the inoculum was removed and  
455 replaced with 10 ml fresh 1x BES (1X minimal essential Eagle's medium [MEM], 0.3% tryptose  
456 phosphate broth, 0.2% bovine serum albumin, 20 mM N,N-Bis(2-hydroxyethyl)-2-  
457 aminoethanesulfonic acid (BES), 0.21% sodium bicarbonate, 2 mM L-glutamine, 250 U/ml  
458 nystatin, 100 U/ml penicillin, and 100 U/ml streptomycin). Cells were harvested at 24 hours post-  
459 infection when clear regions of cytopathic effect (CPE) were visible.

460

461 **Drug treatment, cell harvesting and lysis:** Cycloheximide (CHX; Sigma-Aldrich) was added  
462 directly to the growth medium (to 100 µg/ml) and the cells incubated for 2 min at 37 °C before  
463 rinsing with 5 ml of ice-cold PBS containing CHX (100 µg/ml). Subsequently, dishes were  
464 incubated on ice and 400 µl of lysis buffer [20 mM Tris-HCl pH 7.5, 150 mM NaCl, 5 mM MgCl<sub>2</sub>,  
465 1 mM DTT, 1% Triton X-100, 100 µg/ml cycloheximide and 25 U/ml TURBO™ DNase (Life  
466 Technologies)] dripped onto the cells. The cells were scraped extensively to ensure lysis, collected  
467 and triturated with a 26-G needle ten times. Lysates were clarified by centrifugation for 20 min at  
468 13,000 g at 4 °C, the supernatants recovered and stored at -80 °C.

469

470 **Ribosomal profiling and RNASeq:** Cell lysates were subjected to RiboSeq and RNASeq. The  
471 methodologies employed were based on the original protocols of Ingolia and colleagues (Ingolia et  
472 al., 2009; 2012), except ribosomal RNA contamination was removed using a commercial RiboZero  
473 Gold magnetic kit (Illumina) and library amplicons were constructed using a small RNA cloning  
474 strategy (Guo et al., 2010) adapted to Illumina smallRNA v2 to allow multiplexing. The methods  
475 used were as described by Chung et al. (2015), except the 5' and 3' adapters included seven  
476 consecutive randomised bases at the 3' and 5' ends (respectively). This facilitated removal of reads

477 duplicated during polymerase chain reaction (PCR) amplification of cDNA libraries (Aird et al;  
478 2011) and reduced ligation bias. Amplicon libraries were deep sequenced using an Illumina  
479 NextSeq platform (Department of Pathology, University of Cambridge).

480

#### 481 **Computational analysis of RiboSeq and RNASeq data**

482 Adaptor sequences were trimmed using FASTX-Toolkit ([hannonlab.cshl.edu/fastx\\_toolkit](http://hannonlab.cshl.edu/fastx_toolkit)), and  
483 reads shorter than 25 nt following adaptor trimming were discarded. Mapping was performed using  
484 Bowtie version 1 (Langmead et al., 2009) with parameters `-v 2 --best` (i.e. maximum 2 mismatches,  
485 report best match). Adaptor-trimmed, de-duplicated reads were mapped sequentially to host (*Gallus*  
486 *gallus*) ribosomal RNA (rRNA); IBV Beaudette (GenBank accession: NC\_001451.1) or IBV M41  
487 (GenBank accession: DQ834384.1) gRNA; Ensembl host non-coding RNA (ncRNA); NCBI  
488 RefSeq host mRNA; and to the host genome. The order of mapping was tested to check that virus-  
489 derived reads were not lost accidentally due to mis-mapping to host RNA, or *vice versa*. When  
490 performing analyses of viral and host gene expression, only 28- and 29-nt RiboSeq reads  
491 (corresponding to RPFs mapping primarily in phase 0) and only  $\geq 40$  nt RNASeq reads were used.  
492 A 12-nt offset was applied to the 5' mapping positions of RPFs, to approximate the P-site position  
493 of the ribosome (see **Supp. Fig. S4** and Irigoyen et al., 2016). To normalize for different library  
494 sizes, reads per million mapped reads (RPM) values were calculated using the sum of total virus  
495 RNA plus total host RefSeq mRNA (positive sense reads only) as the denominator.

496

497 Host mRNA RiboSeq and RNASeq phasing distributions were derived from reads mapping  
498 internally to the coding regions of ORFs; specifically, the 5' end of the read had to map between the  
499 first nucleotide of the initiation codon and 30 nt 5' of the last nucleotide of the termination codon,  
500 thus, in general, excluding RPFs of initiating or terminating ribosomes. Histograms of 5' end

501 positions of host mRNA reads relative to initiation and termination codons (Supp. Figs. 4 – 7) were  
502 derived from reads mapping to RefSeq mRNAs with annotated CDSs at least 450 nt in length and  
503 annotated 5' and 3' UTRs at least 60 nt in length. When calculating the translation efficiencies of  
504 viral genes, only in-phase (i.e. phase 0 with respect to the ORF in question) RiboSeq reads were  
505 counted.

506

507 For host differential expression analyses, non-ribosomal, non-viral reads in each library were  
508 mapped to the *Gallus gallus* 5.0 assembly (December 2015) using STAR (Dobin et al., 2013), with  
509 gene annotations from Ensembl release 94 (Cunningham et al., 2019). A maximum of two  
510 mismatches were allowed when mapping. Read counts per gene (protein-coding genes only) were  
511 obtained using HTSeq (Anders et al., 2015), with a requirement that reads map entirely within the  
512 forward strand coding sequence (htseq-count parameters: -m intersection-strict -s yes -t CDS). For  
513 each comparison of experimental groups, only genes with an average of at least 50 mapped reads  
514 were included in differential expression analyses. GO term enrichment analysis was carried out  
515 using the topGO package in R (Alexa and Rahnenfuhrer, 2018) and Fisher's exact test was used to  
516 assess the enrichment of individual GO terms in specific gene lists. Protein-protein interaction  
517 networks were constructed using the Search Tool for Retrieval of Interacting Genes (STRING)  
518 database (Szklarczyk et al., 2017).

519

## 520 **Acknowledgements**

521 This work was supported by UK Medical Research Council [MR/M011747/1] and Wellcome Trust  
522 [202797/Z/16/Z] grants to I.B. and Wellcome Trust grant [106207] and European Research Council  
523 (ERC) European Union's Horizon 2020 research and innovation programme grant [646891] to  
524 A.E.F.

525

526 **References**

527 Aird, D., Ross, M.G., Chen, W.S., Danielsson, M., Fennell, T., Russ, C., Jaffe, D.B., Nusbaum, C.  
528 and Gnirke, A. (2011). Analyzing and minimizing PCR amplification bias in Illumina sequencing  
529 libraries. *Genome Biol.* 12: R18.

530

531 Alexa A, Rahnenfuhrer J (2018). *topGO: Enrichment Analysis for Gene Ontology*. R package  
532 version 2.34.0.

533

534 Alonso-Caplen, F.V., Matsuoka, Y., Wilcox, G.E. and Compans, R.W. (1984). Replication and  
535 morphogenesis of avian coronavirus in Vero cells and their inhibition by monensin. *Virus Res.*  
536 1:153-167.

537

538 An, H., Cai, Z., Yang ,Y., Wang, Z., Liu, D.X. and Fang, S. (2019). Identification and formation  
539 mechanism of a novel noncoding RNA produced by avian infectious bronchitis virus. *Virology*  
540 528:176-180.

541

542 Anders, S., Pyl, P.T. and Huber, W. (2015). HTSeq - a Python framework to work with high-  
543 throughput sequencing data. *Bioinformatics* 31:166-169.

544

545 Atkins, J.F., Loughran, G., Bhatt, P.R., Firth, A.E. and Baranov, P.V. (2016). Ribosomal  
546 frameshifting and transcriptional slippage: From genetic steganography and cryptography to  
547 adventitious use. *Nucleic Acids Res.* 44:7007-7078.

548



- 549 Beaudette, F. R. and Hudson C. R. (1937). Cultivation of the virus of infectious bronchitis. *J. Am.*  
550 *Vet. Med. Assoc.* 90: 51–60.
- 551
- 552 Bentley, K., Keep, S.M., Armesto, M. and Britton, P. (2013). Identification of a noncanonically  
553 transcribed subgenomic mRNA of infectious bronchitis virus and other gammacoronaviruses.  
554 *J. Virol.* 87: 2128-2136.
- 555
- 556 Bickerton, E., Maier, HJ., Stevenson-Leggett, P., Armesto, M. and Britton, P. (2018). The S2  
557 Subunit of Infectious Bronchitis Virus Beaudette Is a Determinant of Cellular Tropism. *J. Virol.* 92.  
558 pii: e01044-18.
- 559
- 560 Bournsnel, M.E., Brown, T.D., Foulds, I.J., Green, P.F., Tomley, F.M., Binns, M.M. (1987).  
561 Completion of the sequence of the genome of the coronavirus avian infectious bronchitis virus. *J.*  
562 *Gen. Virol.* 68:57-77.
- 563
- 564 Brierley, I., Bournsnel, M.E., Binns, M.M., Bilimoria, B., Blok, V.C., Brown, T.D. and Inglis, S.C.  
565 (1987). An efficient ribosomal frame-shifting signal in the polymerase-encoding region of the  
566 coronavirus IBV. *EMBO J.* 6: 3779-3785.
- 567
- 568 Brierley, I, Digard, P. and Inglis, S.C. (1989). Characterization of an efficient coronavirus ribosomal  
569 frameshifting signal: requirement for an RNA pseudoknot. *Cell* 57: 537-547.
- 570

- 571 Brierley I. and Pennell, S. (2001). Structure and function of the stimulatory RNAs involved in  
572 programmed eukaryotic-1 ribosomal frameshifting. *Cold Spring Harb. Symp. Quant. Biol.* 66: 233-  
573 248.
- 574
- 575 Brockway, S.M, Clay, C.T., Lu, X.T. and Denison, M.R. (2003). Characterization of the expression,  
576 intracellular localization, and replication complex association of the putative mouse hepatitis virus  
577 RNA-dependent RNA polymerase. *J. Virol.* 77: 10515-10527.
- 578
- 579 Brown, T.D., Boursnell, M.E., Binns, M.M. and Tomley, F.M. (1986). Cloning and sequencing of 5'  
580 terminal sequences from avian infectious bronchitis virus genomic RNA. *J. Gen. Virol.* 67:221-228.
- 581
- 582 Cao, J., Wu, C.C. and Lin, T.L. (2008). Complete nucleotide sequence of polyprotein gene 1 and  
583 genome organization of turkey coronavirus. *Virus Res.* 136: 43-49.
- 584
- 585 Casais, R., Dove, B., Cavanagh D. and Britton, P. (2003). Recombinant avian infectious bronchitis  
586 virus expressing a heterologous spike gene demonstrates that the spike protein is a determinant of  
587 cell tropism. *J. Virol.* 77: 9084-9089.
- 588 Casais, R., Thiel, V., Siddell, S.G., Cavanagh, D. and Britton, P. (2001). Reverse genetics system for  
589 the avian coronavirus infectious bronchitis virus. *J. Virol.* 75, 12359–12369.
- 590
- 591 Cavanagh, D. (2005). Coronaviruses in poultry and other birds. *Avian Pathol.* 34: 439-448.
- 592
- 593 Cavanagh, D. (2007). Coronavirus avian infectious bronchitis virus. *Vet. Res.* 38: 281-297.
- 594

- 595 Chadani, Y., Niwa, T., Chiba, S., Taguchi, H. and Ito, K. (2016). Integrated *in vivo* and *in vitro*  
596 nascent chain profiling reveals widespread translational pausing. Proc. Natl. Acad. Sci. U.S.A.  
597 113:E829-38.
- 598
- 599 Chhabra, R., Ball, C., Chantrey, J. and Ganapathy, K. (2018). Differential innate immune responses  
600 induced by classical and variant infectious bronchitis viruses in specific pathogen free chicks. Dev.  
601 Comp. Immunol. 87:16-23.
- 602
- 603 Charneski, C.A. and Hurst, L.D. (2013). Positively charged residues are the major determinants of  
604 ribosomal velocity. PLoS Biol. 11:e1001508.
- 605
- 606 Chung, B.Y., Hardcastle, T.J., Jones J.D, Irigoyen, N, Firth ,A.E., Baulcombe, D.C. and Brierley,  
607 I. (2015). The use of duplex-specific nuclease in ribosome profiling and a user-friendly software  
608 package for Ribo-seq data analysis. RNA 21:1731-1745.
- 609
- 610 Cong, F., Liu, X., Han Z., Shao, Y., Kong, X. and Liu, S. (2013). Transcriptome analysis of chicken  
611 kidney tissues following coronavirus avian infectious bronchitis virus infection. BMC Genomics  
612 14:743.
- 613
- 614 Cunningham, C.H., Spring, M.P. and Nazerian, K. (1972). Replication of avian infectious bronchitis  
615 virus in African green monkey kidney cell line VERO. J. Gen. Virol. 16: 423-427.
- 616
- 617 Cunningham, F., Achuthan, P., Akanni, W., Allen, J., Amode, M.R., Armean, I.M., Bennett, R.,  
618 Bhai, J., Billis, K., Boddu, S. et al. (2019). Ensembl 2019. Nucleic Acids Res. 47:D745-D751.

619

620 Dobin, A., Davis, C.A., Schlesinger, F., Drenkow, J., Zaleski, C., Jha, S., Batut, P, Chaisson, M. and  
621 Gingeras, T.R. (2013). STAR: ultrafast universal RNA-seq aligner. *Bioinformatics* 29:15-21.

622

623 Doyle, N., Neuman, B.W., Simpson, J., Hawes, P.C., Mantell, J., Verkade, P., Alrashedi, H. and  
624 Maier, H.J. (2018). Infectious Bronchitis Virus Nonstructural Protein 4 Alone Induces Membrane  
625 Pairing. *Viruses* 10 pii: E477.

626

627 Duncan, C.D.S. and Mata, J. (2017). Effects of cycloheximide on the interpretation of ribosome  
628 profiling experiments in *Schizosaccharomyces pombe*. *Sci. Rep.* 7:10331.

629

630 Firth, A.E. and Brierley, I. (2012). Non-canonical translation in RNA viruses. *J. Gen. Virol.*  
631 93:1385-1409.

632

633 Fuchs, R.T., Sun, Z., Zhuang, F. and Robb, G.B (2015). Bias in ligation-based small RNA  
634 sequencing library construction is determined by adaptor and RNA structure. *PLoS One.* 10:  
635 e0126049.

636

637 Gerashchenko, M.V. and Gladyshev, V.N. (2014). Translation inhibitors cause abnormalities in  
638 ribosome profiling experiments. *Nucleic Acids Res.* 42:e134.

639

640 Gomaa, M.H., Barta, J.R., Ojkic, D. and Yoo, D. (2008). Complete genomic sequence of turkey  
641 coronavirus. *Virus Res.* 135: 237-246.

642

- 643 Gorbalenya, A.E , Enjuanes, L., Ziebuhr, J. and Snijder E.J. (2006). Nidovirales: evolving the  
644 largest RNA virus genome. *Virus Res.* 117: 17-37.
- 645
- 646 Hennion, R. and Hill, G. (2015). In *Coronaviruses* Vol. 1282 *Methods in Molecular Biology* (eds  
647 Helena Jane Maier, Erica Bickerton, & Paul Britton) Ch. 6, 57–62. (Springer New York).
- 648
- 649 Hodgson, T., Casais, R., Dove, B., Britton, P. and Cavanagh, D. (2014). Recombinant infectious  
650 bronchitis coronavirus Beaudette with the spike protein gene of the pathogenic M41 strain remains  
651 attenuated but induces protective immunity. *J. Virol.* 78: 13804-13811.
- 652
- 653 Ingolia, N.T., Ghaemmaghami, S., Newman, J.R. and Weissman, J.S. (2009). Genome-wide  
654 analysis in vivo of translation with nucleotide resolution using ribosome profiling. *Science.* 324:  
655 218-223.
- 656
- 657 Ingolia, N.T., Lareau, L.F. and Weissman, J.S. (2011). Ribosome profiling of mouse embryonic  
658 stem cells reveals the complexity and dynamics of mammalian proteomes. *Cell.* 147: 789-802.
- 659
- 660 Ingolia, N.T., Brar, G.A., Rouskin, S., McGeachy, A.M. and Weissman, J.S. (2012). The ribosome  
661 profiling strategy for monitoring translation in vivo by deep sequencing of ribosome-protected  
662 mRNA fragments. *Nat. Protoc.* 7:1534-1550.
- 663
- 664 Ingolia, N.T. (2014). Ribosome profiling: new views of translation, from single codons to genome  
665 scale. *Nat. Rev. Genet.* 15:205-213.
- 666

667 Irigoyen, N., Firth, A.E., Jones, J.D., Chung, B.Y., Siddell, S.G and Brierley, I. (2016). High-  
668 resolution analysis of coronavirus gene expression by RNA sequencing and ribosome profiling.  
669 PLoS Pathog. 12:e1005473.  
670

671 Irigoyen, N., Dinan, A.M., Brierley, I. and Firth, A.E. (2018). Ribosome profiling of the retrovirus  
672 murine leukemia virus. *Retrovirology* 15: 10.  
673

674 Jukes, T.H. (1996). On the prevalence of certain codons ("RNY") in genes for proteins. *J. Mol.*  
675 *Evol.* 42:3 77-381.  
676

677 Kottier, S.A., Cavanagh, D. and Britton, P. (1995). Experimental evidence of recombination in  
678 coronavirus infectious bronchitis virus. *Virology.* 213:569-580.  
679

680 Kumari, R., Michel, A.M. and Baranov, P.V. (2018). PausePred and Rfeet: webtools for inferring  
681 ribosome pauses and visualizing footprint density from ribosome profiling data. *RNA* 24:1297-  
682 1304.  
683

684 Kuo, L. and Masters, P.S. (2013). Functional analysis of the murine coronavirus genomic RNA  
685 packaging signal. *J. Virol.* 87:5182-5192.  
686

687 Langmead, B., Trapnell, C., Pop, M. and Salzberg, S.L. (2009). Ultrafast and memory-efficient  
688 alignment of short DNA sequences to the human genome. *Genome Biol.* 10: R25.  
689

690 Laude, Hubert, and Paul S. Masters. "The coronavirus nucleocapsid protein." *The Coronaviridae*.  
691 Springer US, 1995. 141-163.

692

693 Liu, D.X., Xu, H.Y. and Brown, T.D. (1997). Proteolytic processing of the coronavirus infectious  
694 bronchitis virus 1a polyprotein: identification of a 10-kilodalton polypeptide and determination of  
695 its cleavage sites. *J Virol.* 71:1814-1820.

696

697 Oostra, M., te Lintelo, E.G., Deijs, M., Verheije, M.H., Rottier, P.J. and de Haan, C.A. (2007).  
698 Localization and membrane topology of coronavirus nonstructural protein 4: involvement of the  
699 early secretory pathway in replication. *J. Virol.* 81:12323-12336.

700

701 Otsuki, K., Noro, K., Yamamoto, H. and Tsubokura, M. (1979). Studies on avian infectious  
702 bronchitis virus (IBV). II. Propagation of IBV in several cultured cells. *Arch. Virol.* 60: 115-122.

703

704 Pasternak, A.O., van den Born, E., Spaan, W.J. and Snijder, E.J. (2001). Sequence requirements for  
705 RNA strand transfer during nidovirus discontinuous subgenomic RNA synthesis. *EMBO J.* 20:  
706 7220-7228.

707

708 Reddy, V.R., Theuns, S., Roukaerts, I.D., Zeller, M., Matthijnsens, J. and Nauwynck, H.J. (2015).  
709 Genetic Characterization of the Belgian Nephropathogenic Infectious Bronchitis Virus (NIBV)  
710 Reference Strain B1648. *Viruses* 7: 4488-4506.

711

712 Requião, R.D., de Souza, H.J., Rossetto, S., Domitrovic, T. and Palhano, F.L. (2016). Increased  
713 ribosome density associated to positively charged residues is evident in ribosome profiling  
714 experiments performed in the absence of translation inhibitors. *RNA Biol.* 13:561-568.

715

716 Sabi, R. and Tuller T. (2015). A comparative genomics study on the effect of individual amino acids  
717 on ribosome stalling. *BMC Genomics* 16 Suppl. 10:S5.

718

719 Sabi, R. and Tuller, T. (2017). Computational analysis of nascent peptides that induce ribosome  
720 stalling and their proteomic distribution in *Saccharomyces cerevisiae*. *RNA* 23:983-994.

721

722 Sawicki, S.G. and Sawicki, D.L. (1995). Coronaviruses use discontinuous extension for synthesis of  
723 subgenome-length negative strands. *Adv. Exp. Med. Biol.* 380: 499-506.

724

725 Sawicki, S.G. and Sawicki, D.L. (1998). A new model for coronavirus transcription. *Adv. Exp.*  
726 *Med. Biol.* 440: 215-219.

727

728 Sawicki, S.G., Sawicki, D.L. and Siddell, S.G. (2007). A contemporary view of coronavirus  
729 transcription. *J. Virol.* 81: 20-29.

730

731 Stewart, H., Brown, K., Dinan, A.M., Irigoyen, N., Snijder, E.J. and Firth, A.E. (2018).  
732 Transcriptional and translational landscape of equine torovirus. *J. Virol.* 92 pii: e00589-18.

733



- 734 Sola, I., Moreno, J.L., Zúñiga, S., Alonso, S. and Enjuanes, L. (2005). Role of nucleotides  
735 immediately flanking the transcription-regulating sequence core in coronavirus subgenomic mRNA  
736 synthesis. *J. Virol.* 79: 2506-2516.
- 737
- 738 Stern-Ginossar, N. (2015). Decoding viral infection by ribosome profiling. *J. Virol.* 89: 6164-6166.
- 739
- 740 Stirrups, K., Shaw, K., Evans, S., Dalton, K., Casais, R., Cavanagh, D. and Britton, P. (2000).  
741 Expression of reporter genes from the defective RNA CD-61 of the coronavirus infectious  
742 bronchitis virus. *J. Gen. Virol.* 81:1687-1698.
- 743
- 744 Szklarczyk, D., Morris, J.H., Cook, H., Kuhn, M., Wyder, S., Simonovic, M., Santos, A., Doncheva,  
745 N.T., Roth, A., Bork, P., Jensen, L.J. and von Mering, C. (2017). The STRING database in 2017:  
746 quality-controlled protein-protein association networks, made broadly accessible. *Nucleic Acids*  
747 *Res.* 45(D1):D362-D368.
- 748
- 749 Tagliabracci, V.S., Wiley, S.E., Guo, X., Kinch, L.N., Durrant, E., Wen, J., Xiao, J., Cui, J., Nguyen,  
750 K.B., Engel, J.L., Coon, J.J., Grishin, N., Pinna, L.A., Pagliarini, D.J. and Dixon, J.E. (2015). A  
751 Single Kinase Generates the Majority of the Secreted Phosphoproteome. *Cell* 161:1619-1632.
- 752
- 753 Van Roekel, H., Clarke, M.K., Bullis, K.L., Olesiuk, O.M. and Sperling, F.G. (1951). Infectious  
754 bronchitis. *Am. J. Vet. Res.* 12:140-146.
- 755
- 756 Wolin, S.L. and Walter, P. (1988). Ribosome pausing and stacking during translation of a eukaryotic  
757 mRNA. *EMBO J.* 7: 3559-3569.

758

759 Zhang, J., Kaiser, M.G., Deist, MS., Gallardo, R.A., Bunn, D.A., Kelly, T.R., Dekkers, J.C.M.,  
760 Zhou, H. and Lamont, S.J. (2018). Transcriptome analysis in spleen reveals differential regulation  
761 of response to Newcastle disease virus in two chicken lines. *Sci. Rep.* 8:1278.

762

763 Zúñiga, S., Sola, I., Alonso, S. and Enjuanes, L. (2004). Sequence motifs involved in the regulation  
764 of discontinuous coronavirus subgenomic RNA synthesis. *J. Virol.* 78: 980-994.

765

766

## 767 **FIGURE LEGENDS**

768 **Figure 1. Structure and read coverage of the (A) IBV Beaudette and (B) IBV M41 genomes.**

769 Coverage in the RiboSeq (red) and RNASeq (green) libraries is plotted on a logarithmic scale. The  
770 5' two-thirds of the IBV gRNA contains two large ORFs encoding pp1a and pp1b, respectively.  
771 Translation of the latter requires  $-1$  programmed ribosomal frameshifting (PRF) at the indicated  
772 site. A nested set of 3'-coterminal sgmRNAs is produced during infection. Diamond symbols show  
773 the locations of canonical TRSs at which discontinuous transcription occurs (TRS-L in orange and  
774 TRS-B in green). Downward arrows indicate the positions of non-canonical TRSs discussed in this  
775 work. Purple triangles indicate sites of ribosomal pausing (see text).

776

777 **Figure 2. (A)** Proportion of chimeric reads assigned to each of the indicated TRS junctions. Novel  
778 TRS identified in this study are indicated with asterisks. Note that the 5a/5b TRS 1 and the dORF  
779 TRS are present in IBV Beaudette only. **(B)** Sequence logo depicting nucleotides surrounding the  
780 identified TRS-B sites in IBV Beaudette. **(C)** Equivalent sequence logo for IBV M41. **(D)** RiboSeq

781 and RNASeq coverage of the IBV Beaudette dORF. The location of the novel TRS-B sequence,  
782 which begins 2 nt 3' of the N gene termination codon, is indicated with an arrow. Coverage is  
783 expressed as reads per million mapped reads (RPM). Reads in phase 0, +1, and +2 relative to the N  
784 gene ORF are shown in blue, purple, and orange, respectively; and ORFs are coloured according to  
785 the frame in which they are encoded.

786

787 **Figure 3.** RiboSeq and RNASeq coverage proximal to the junction between ORF1a and ORF1b for  
788 IBV Beaudette **(A)** and IBV M41 **(B)**.-The last 2,500 nt of ORF1a and first 2,500 nt of ORF1b are  
789 shown. Coverage is normalised to reads per million mapped reads (RPM), and smoothed with a  
790 121-codon sliding window. Reads in phase 0, +1, and +2 relative to ORF1a are shown in blue,  
791 purple, and orange, respectively; and ORFs are coloured according to the frame in which they are  
792 encoded. **(C)** Ratios of ORF1b to ORF1a read density expressed as reads per kilobase per million  
793 mapped reads (RPKM). RPKM values exclude the 150-nt regions downstream of the ORF1a  
794 initiation codon, upstream of the ORF1b termination codon, and either side of the frameshift site.  
795 **(D)** Frameshifting efficiencies calculated using the values plotted in **(C)**.

796

797 **Figure 4.** RiboSeq and RNASeq coverage of ORF4b and ORF4c in **(A)** IBV Beaudette and **(B)** IBV  
798 M41. Coverage is expressed as reads per million mapped reads (RPM). Reads in phase 0, +1, and  
799 +2 relative to ORF4b are shown in blue, purple, and orange, respectively; and ORFs are coloured  
800 according to the frame in which they are encoded.

801

802 **Figure 5.** Translation efficiencies of viral genes, as calculated using the relative abundances (reads  
803 per million, RPM) of chimeric TRS-spanning RNASeq reads. Values shown are relative to the mean  
804 efficiency per TRS.

805

806 **Figure 6.** RiboSeq and RNASeq coverage of sgRNA N in IBV Beaudette. Coverage is expressed  
807 as reads per million mapped reads (RPM). Reads in phase 0, +1, and +2 relative to N are shown in  
808 purple, orange and blue, respectively; and ORFs are coloured according to the frame in which they  
809 are encoded.

810

811 **Figure 7. (A)** Log<sub>2</sub> fold changes (log<sub>2</sub>FC) in host transcript abundance and translation efficiency in  
812 infected cells relative to mocks. In both cases, a high degree of correlation was observed between  
813 log<sub>2</sub>FC values in Beaudette-infected samples (*x*-axes) and M41-infected samples (*y*-axes), with  
814 transcript abundances skewed towards positive log<sub>2</sub>FC values. **(B)** The ten most significantly  
815 enriched GO terms among commonly up-regulated (left panel) and commonly down-regulated  
816 (right panel) genes at the level of transcription. **(C)** The ten most significantly enriched GO terms  
817 among commonly up-regulated (left panel) and commonly down-regulated (right panel) genes at the  
818 level of translation efficiency.

819

820 **Figure 8.** STRING analysis of the relationship between differentially expressed transcripts in  
821 comparisons of IBV M41- and mock-infected cells. **(A)** Downregulated genes **(B)** Upregulated  
822 genes. The network nodes represent the proteins encoded by the differentially expressed genes.  
823 Seven different coloured lines link a number of nodes and represent seven types of evidence used in  
824 predicting associations. A red line indicates the presence of fusion evidence; a green line represents

825 neighborhood evidence; a blue line represents co-occurrence evidence; a purple line represents  
826 experimental evidence; a yellow line represents text-mining evidence; a light blue line represents  
827 database evidence; and a black line represents co-expression evidence.

828

829

### 830 **DATA AVAILABILITY**

831 Sequencing data have been deposited in ArrayExpress (<http://www.ebi.ac.uk/arrayexpress>) under  
832 the accession number E-MTAB-7849.

833 **Table 1.** Ribosomal pause sites within the IBV genome.

834

| Pause              | Genomic location and RPF sequence                                                                                                                                          | Nascent peptide                                                                  |
|--------------------|----------------------------------------------------------------------------------------------------------------------------------------------------------------------------|----------------------------------------------------------------------------------|
| Pause 1<br>(5'NCR) | 5' end of genome (bases 28–56) near TRS_L<br>5' AUUACACUAGCC <u>UUG</u> CGCUAGAUUUUUUA 3'                                                                                  | *YISITL <u>ALR</u> *                                                             |
| Pause 2<br>(nsP4)  | Two adjacent peaks within nsP4 coding region (~8660 and 8760)<br>5' UUUGUUAAGCUU <u>ACU</u> AAUGAGAUAGGU 3'<br>5' UUGCAAGCUUG <u>UCG</u> UGCAUGGUUAGCU 3'                  | YDGNEFVGNYDLAAKSTFVIRGSEFVKL <u>TN</u><br>KFEAYLSAYARLKYYSGTGSEQDY <u>LQACRA</u> |
| Pause 3<br>(S)     | Large pause downstream of initiation codon of S protein (~20,410)<br>5' CUAGUGACUCUU <u>UUG</u> UGUGCACUAUGU 3' (Beau)                                                     | †MLVTP <u>LLLVTLLC</u> (Beau)                                                    |
| Pause 4<br>(M)     | Very large pause immediately downstream of initiation codon of the M protein (~24,500)<br>5' (AUG)CCCAACGAGACAA <u>AAU</u> UGUACUCUUGACU 3'.                               | †MPNET <u>NC</u>                                                                 |
| Pause 5<br>(N)     | Broad pause peak centered on YLSS <u>IP</u> REN near end of 5b ORF (~25,830), just upstream of N start codon ribosome stack<br>5' UACCUCUCUAGU <u>AU</u> UCCAAGGGAAAACU 3' | QSRTSRALSRVYLSS <u>IP</u> (REN <u>L</u> *)                                       |

835

836 Underlined characters signify codon/amino acid of the ribosomal P-site tRNA.

837 \* in-frame stop codon.

838 † initiator methionine

839

840

841

842

843

844

845

846

847

848

849 **Table 2.** STRING analysis of differential gene expression.

850

| Comparison           | Parameter     | Main pathway(s)                                              | Examples in pathway(s) (FDR; log2fc)                                                                                                                                                            |
|----------------------|---------------|--------------------------------------------------------------|-------------------------------------------------------------------------------------------------------------------------------------------------------------------------------------------------|
| <b>Transcription</b> |               |                                                              |                                                                                                                                                                                                 |
| Beaudette vs Mock    | Downregulated | FAM20C substrates                                            | SPP1 (secreted phosphoprotein 1) ( $7.31 \times 10^{-15}$ ; -2.72).<br>TF (transferrin) ( $1.83 \times 10^{-13}$ ; -3.17).                                                                      |
| M41 vs Mock          | Downregulated | FAM20C substrates                                            | SPP1 (secreted phosphoprotein 1) ( $6.13 \times 10^{-10}$ ; -3.177).<br>CHGB (chromogranin B) ( $7.42 \times 10^{-8}$ ; -2.09).                                                                 |
| Beaudette vs Mock    | Upregulated   | Antiviral state, receptor signalling, cytokine interactions  | RSAD2 (viperin) ( $3.92 \times 10^{-155}$ ; 9.49).<br>IFIT5 (interferon induced protein with tetratricopeptide repeats 5) ( $4.48 \times 10^{-142}$ ; 8.66).                                    |
| M41 vs Mock          | Upregulated   | Antiviral state, receptor signalling, cytokine interactions  | RSAD2 (viperin) ( $1.80 \times 10^{-140}$ ; 9.04).<br>IFIT5 (interferon induced protein with tetratricopeptide repeats 5) ( $3.01 \times 10^{-119}$ ; 7.96).                                    |
| M41 vs Beaudette     | Downregulated | Cytokines, cytokine-receptor interactions                    | IL6 (interleukin 6) ( $4.38 \times 10^{-4}$ ; -1.51).<br>IL8L1 (interleukin 8-like 1) ( $1.38 \times 10^{-2}$ ; -1.44).                                                                         |
| M41 vs Beaudette     | Uregulated    | * Heat shock family members                                  | HSPA5 (heat shock 70kDa protein 5) ( $2.28 \times 10^{-5}$ ; 1.74).<br>HSP90AA1(heat shock protein 90 alpha family class A member 1) ( $4.38 \times 10^{-4}$ ; 1.44).                           |
| <b>Translation</b>   |               |                                                              |                                                                                                                                                                                                 |
| Beaudette vs Mock    | Downregulated | No obvious pathways identified (top two hits shown to right) | TIPARP (TCDD inducible poly(ADP-ribose) polymerase) ( $8.42 \times 10^{-23}$ ; -4.32).<br>ADAMTS1 (ADAM metalloproteinase with thrombospondin type 1 motif 1) ( $1.0 \times 10^{-12}$ ; -3.57). |
| M41 vs Mock          | Downregulated | No obvious pathways identified (top two hits shown to right) | TIPARP (TCDD inducible poly(ADP-ribose) polymerase) ( $8.42 \times 10^{-23}$ ; -4.32).<br>PFKFB3 (6-phosphofructo-2-kinase/fructose-2,6-biphosphatase 3) ( $2.47 \times 10^{-13}$ ; -3.49).     |
| Beaudette vs Mock    | Upregulated   | Antiviral response, translation, 80S ribosome, RACK1         | OASL (2'-5'-oligoadenylate synthetase like) ( $5.08 \times 10^{-6}$ ; 2.24).<br>RPSL37 (ribosomal protein L37) ( $5.34 \times 10^{-65}$ ; 1.78).                                                |
| M41 vs Mock          | Upregulated   | Antiviral response, 80S ribosome                             | OASL (2'-5'-oligoadenylate synthetase-like) ( $1.16 \times 10^{-3}$ ; 1.79).<br>RPS8 (ribosomal protein S8) ( $1.03 \times 10^{-2}$ ; 1.35).                                                    |
| M41 vs Beaudette     | Downregulated | No pathways identified                                       | No significant genes identified.                                                                                                                                                                |
| M41 vs Beaudette     | Upregulated   | No pathways identified                                       | Only one significant gene identified, MYH15 (myosin heavy chain 15) (0.032; 1.77)                                                                                                               |

851

852

853

854

\*Only six of the top 100 DEGs were significant in this category (see Supplementary Data S3).

855

856

857

858

859 **Figure 1**  
860

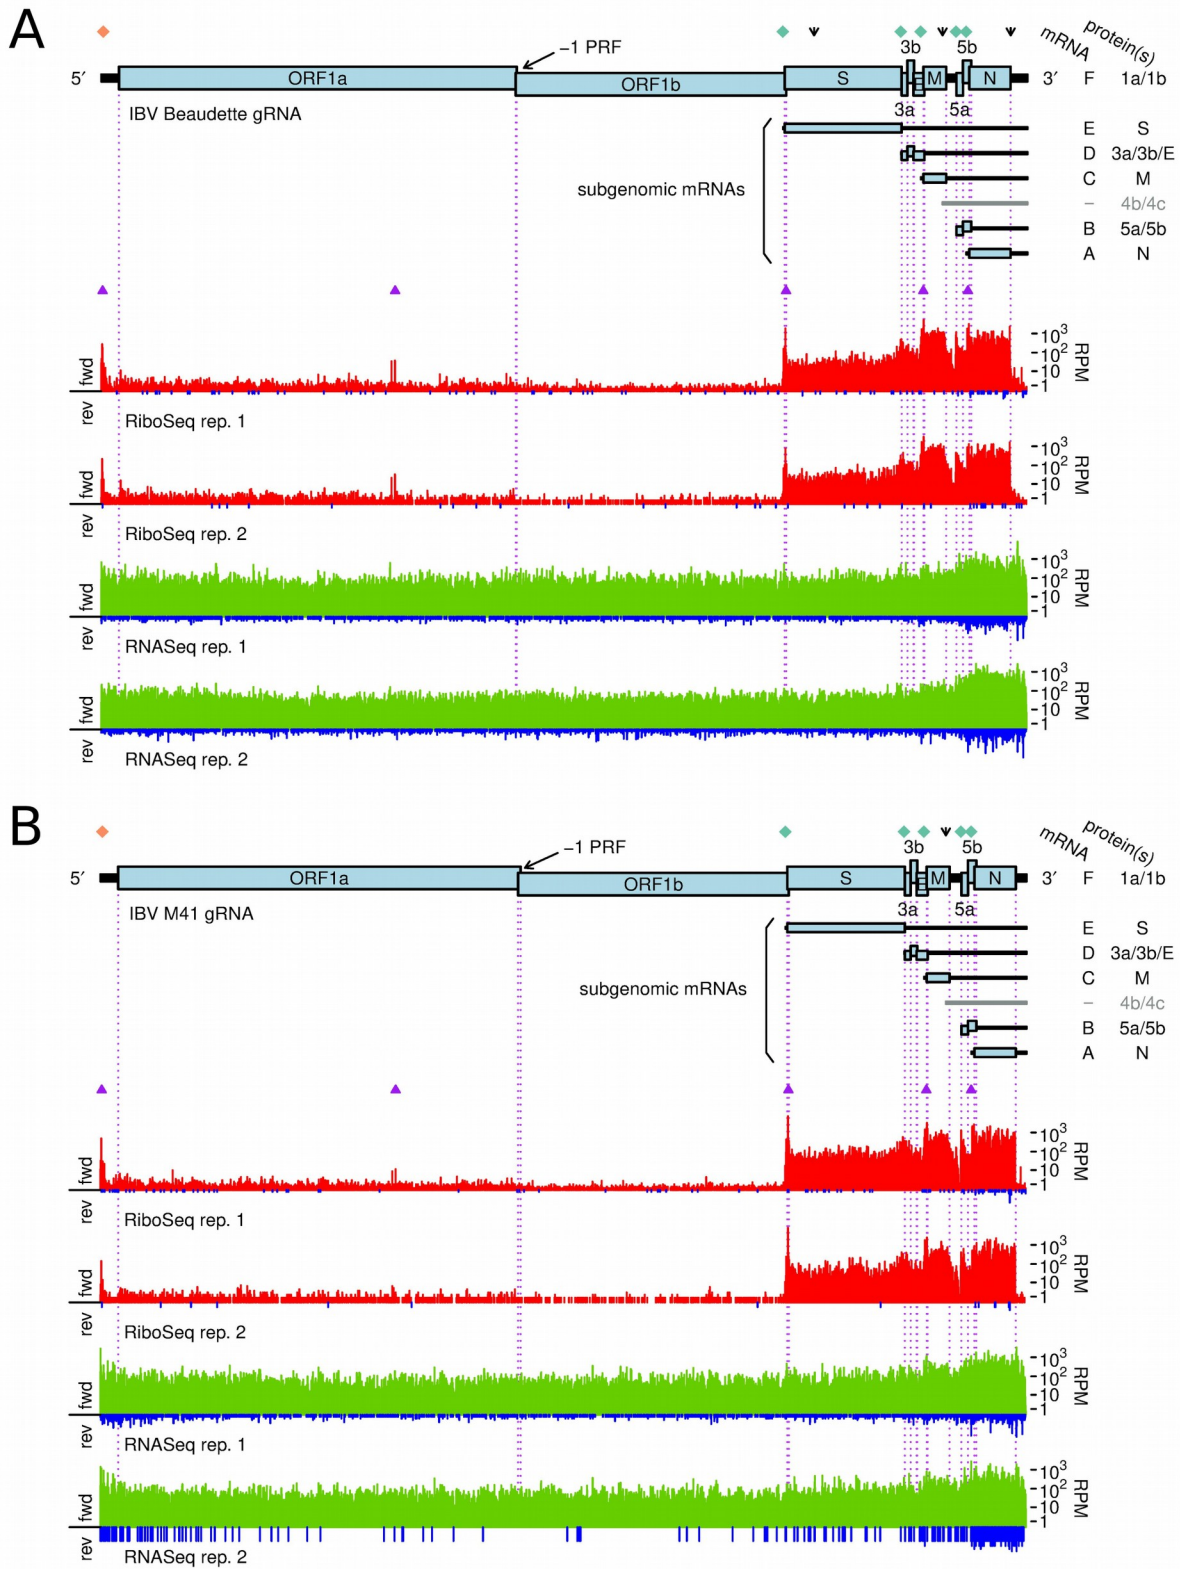

862  
863



864  
865  
866  
867

**Figure 2**

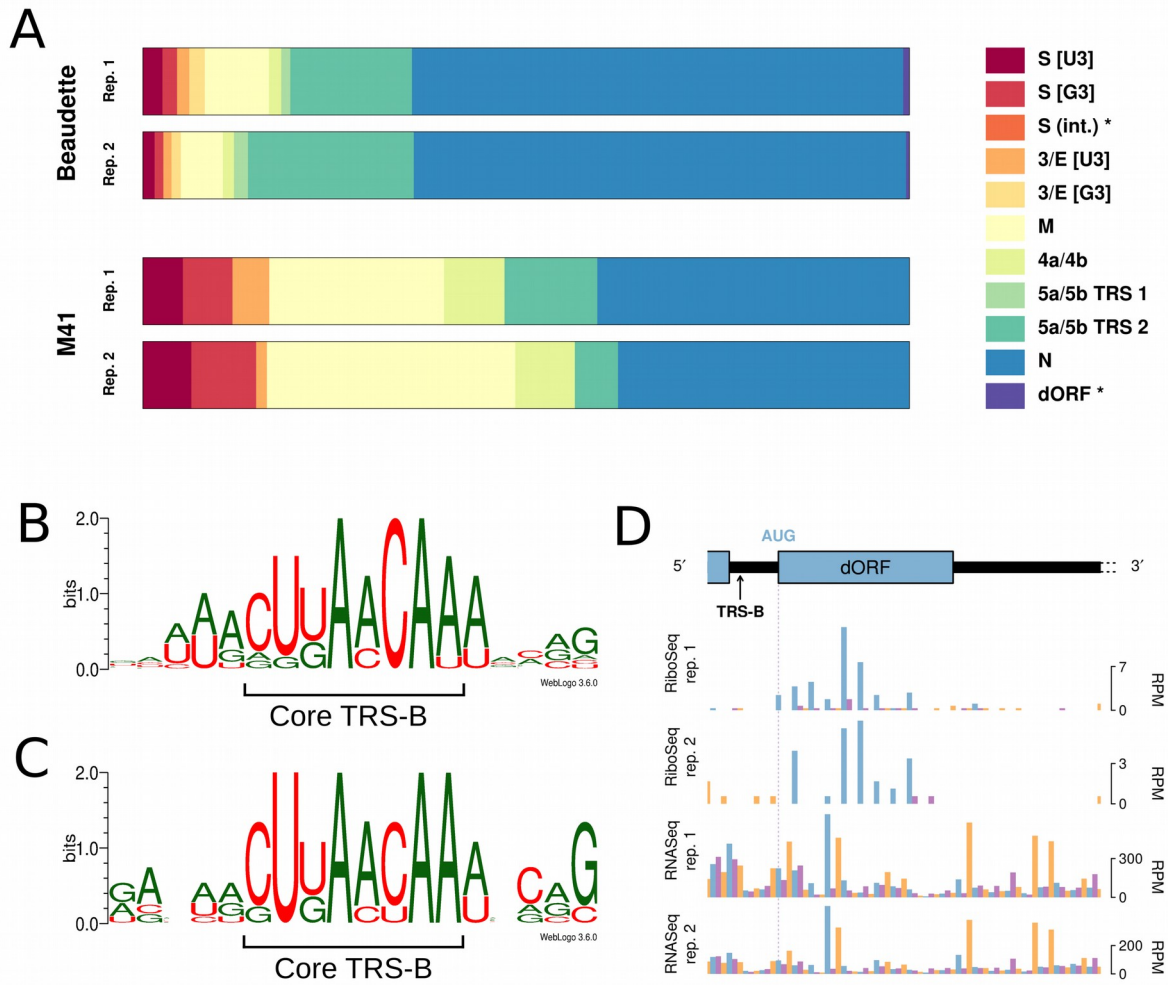

869  
870  
871  
872  
873  
874  
875  
876  
877  
878  
879  
880  
881  
882  
883

884  
885  
886  
887  
888  
889  
890

**Figure 3**

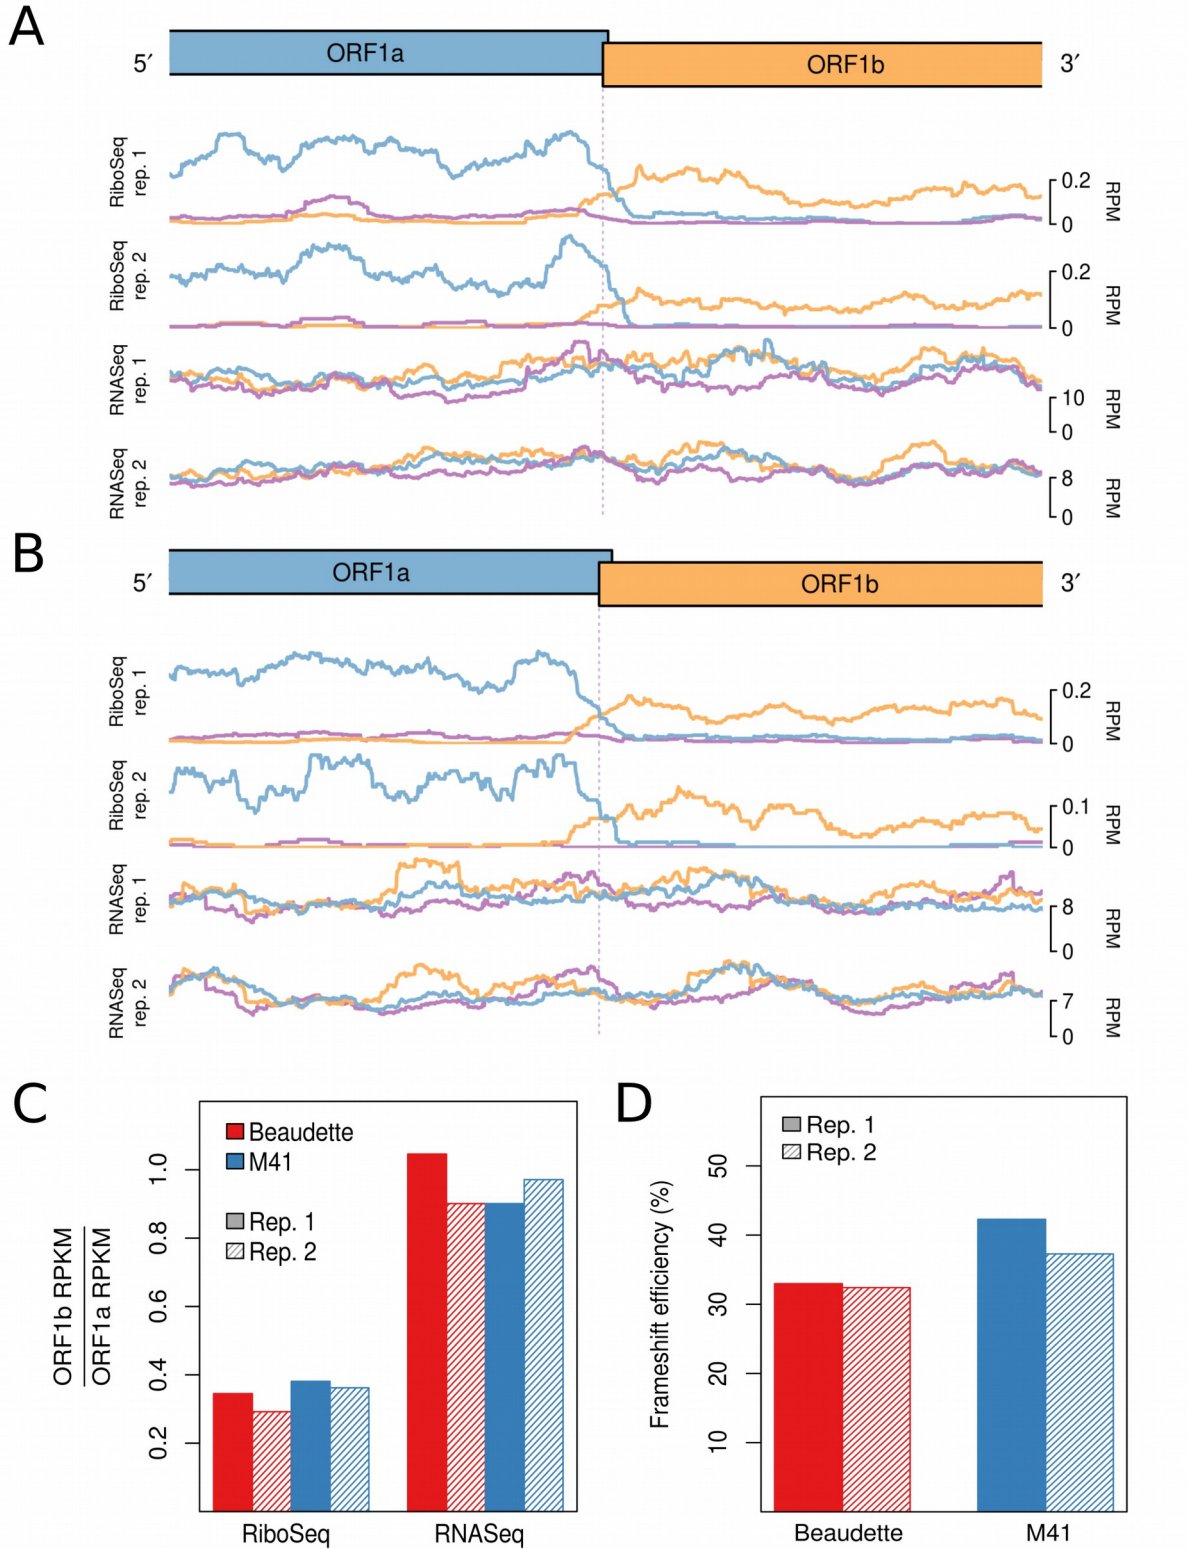

891  
892  
893  
894  
895  
896

**Figure 4**

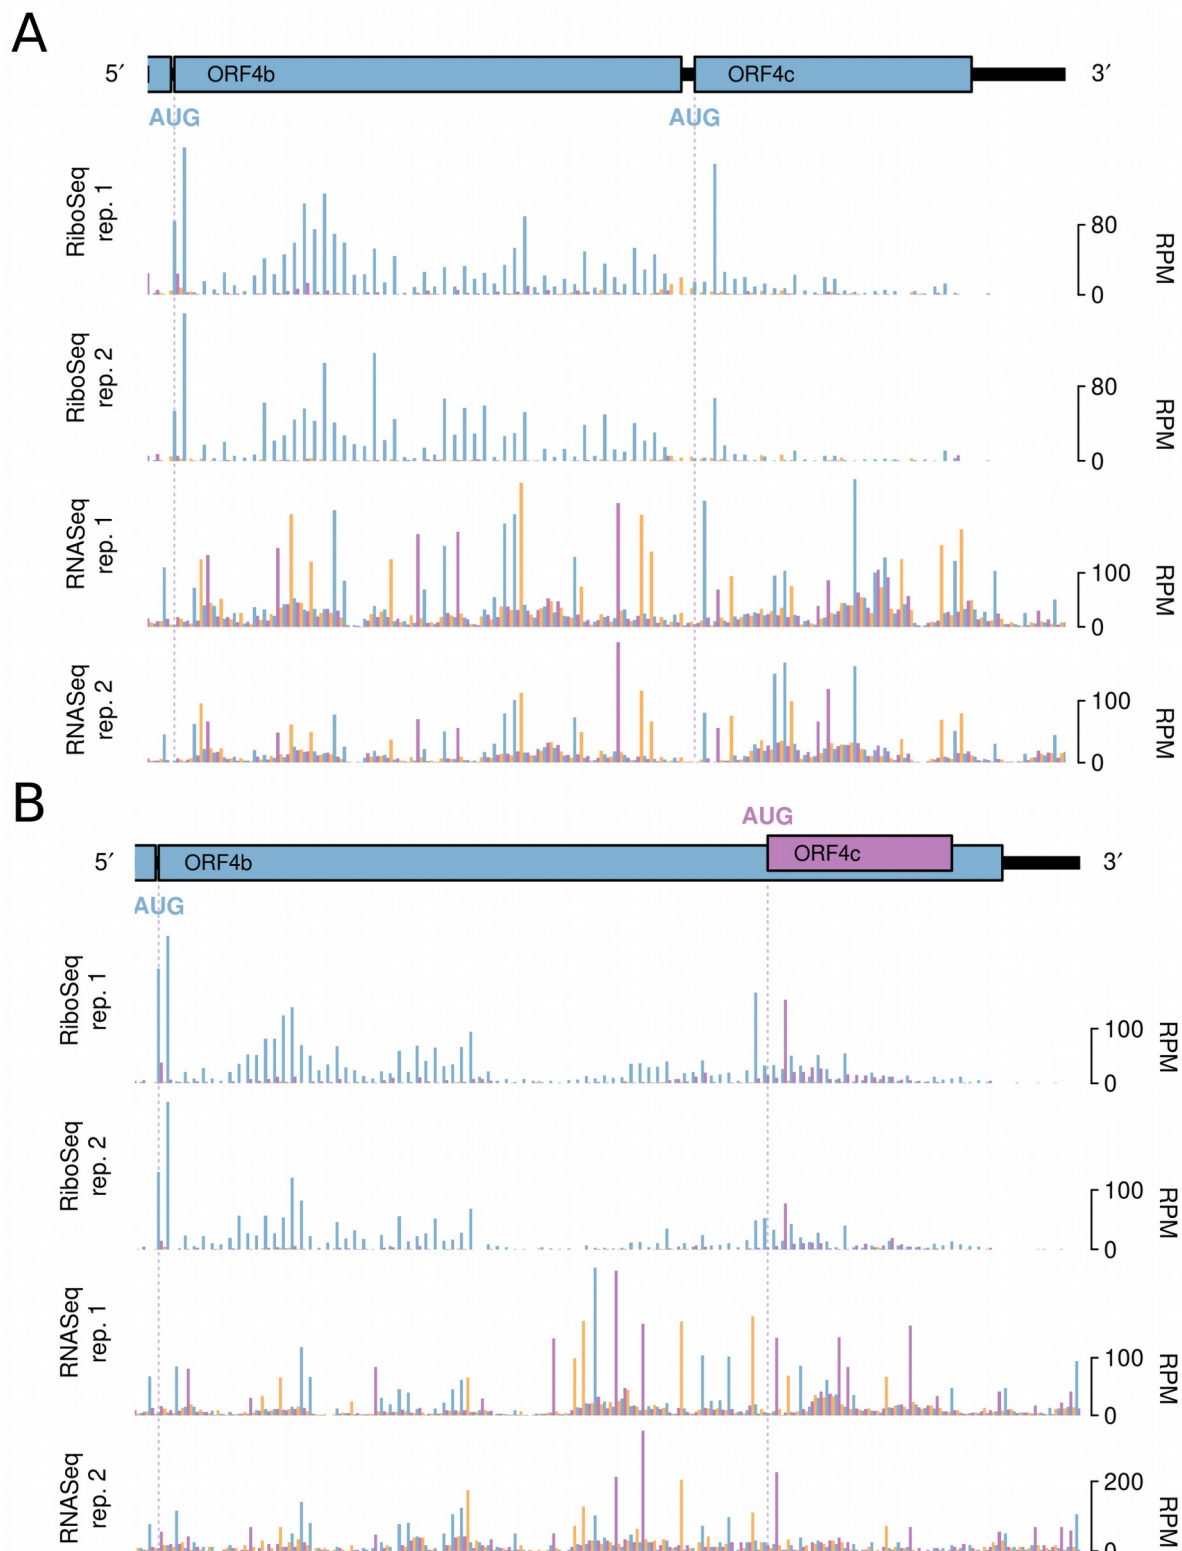

897  
898  
899  
900  
901

Figure 5

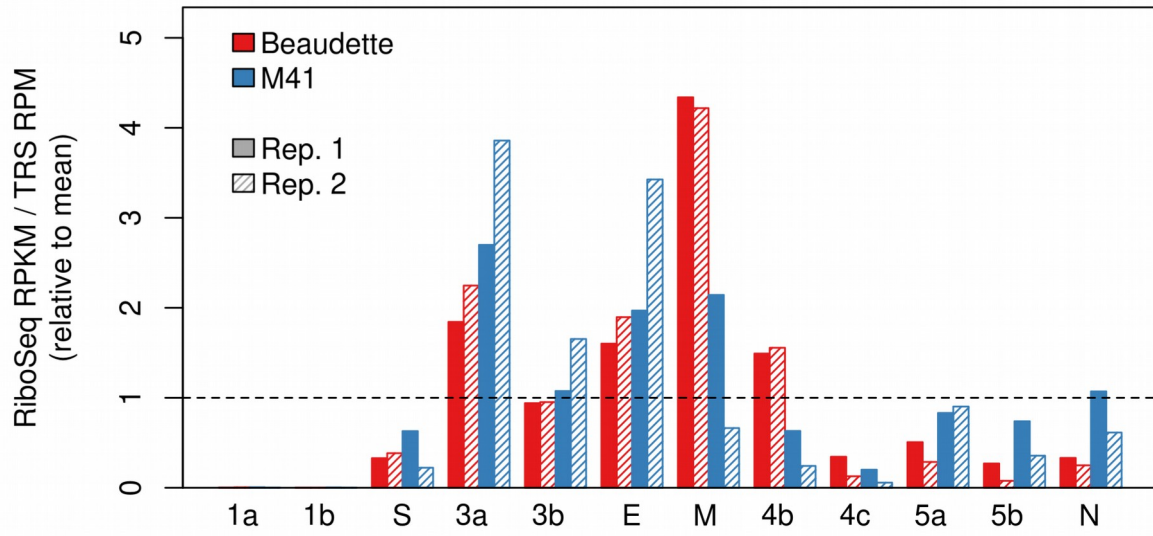

903  
904  
905  
906

Figure 6

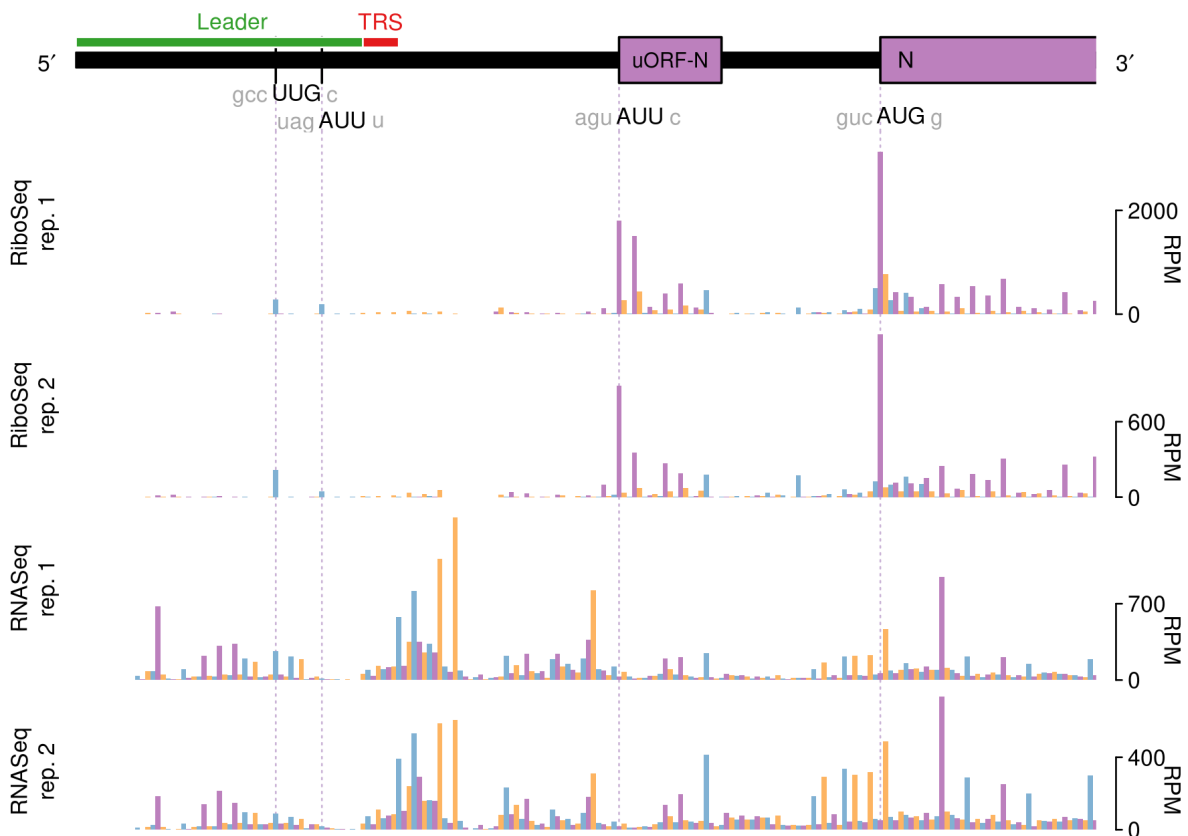

907  
908  
909  
910  
911  
912

**Figure 7**

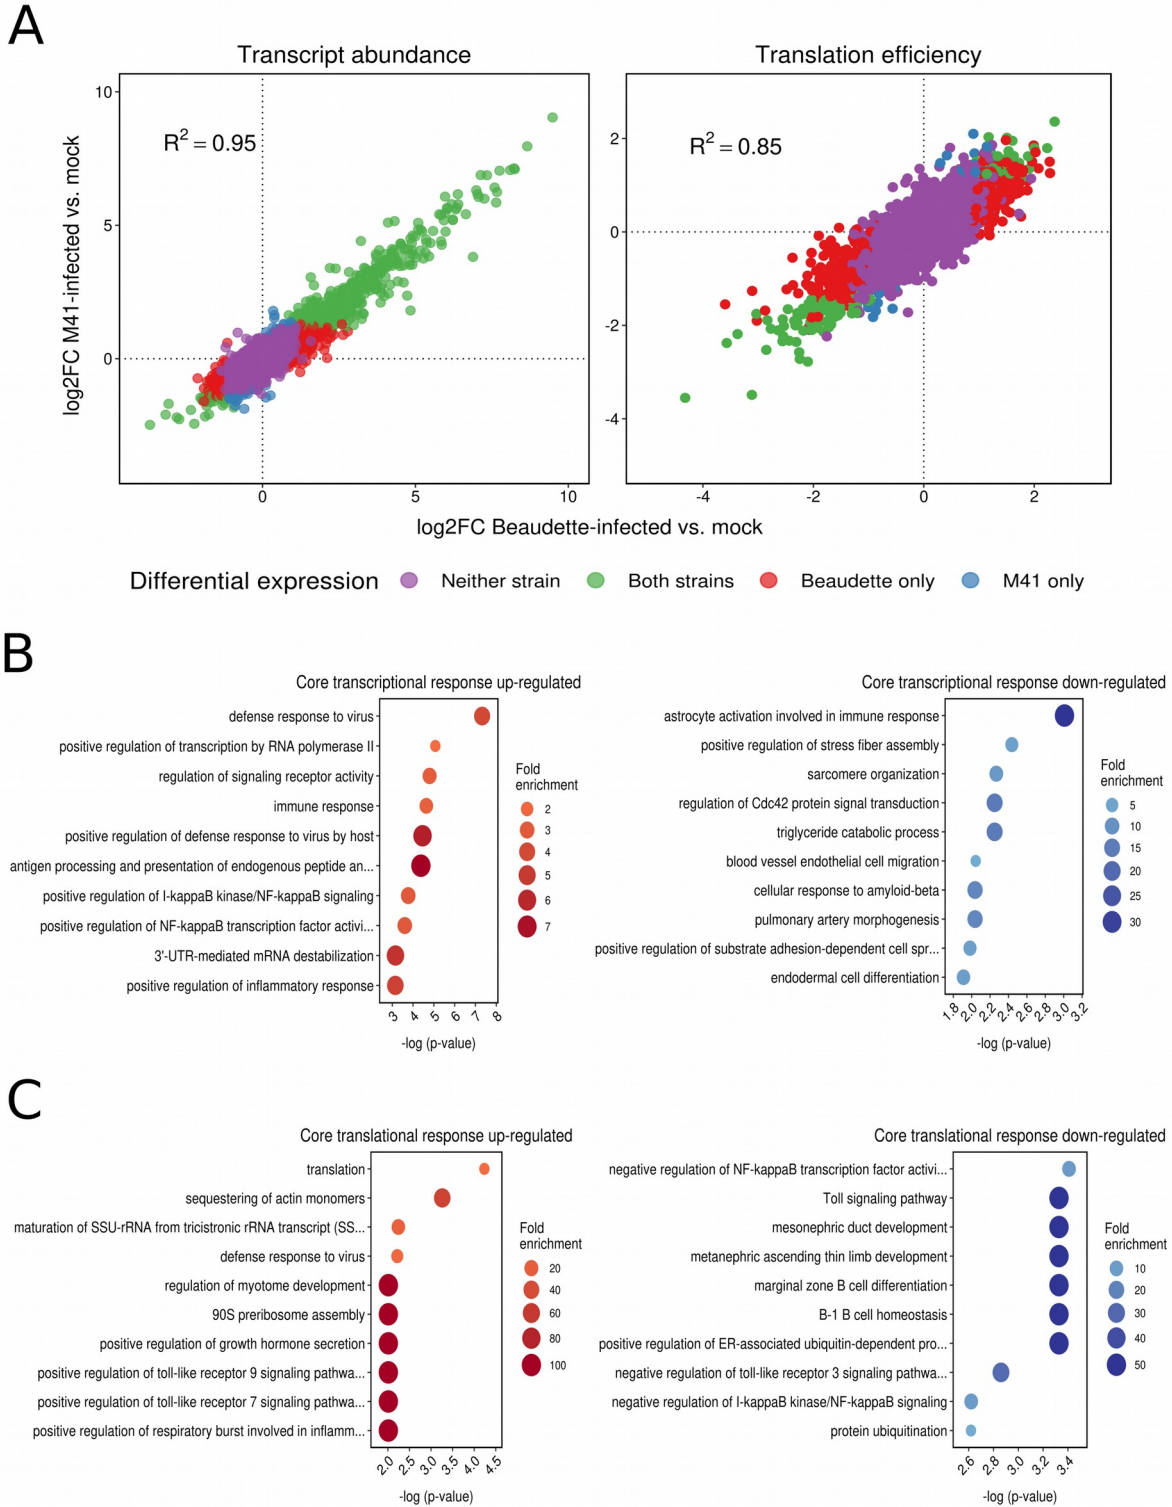

913  
 914  
 915  
 916  
 917  
 918  
 919  
 920  
 921  
 922  
 923  
 924  
 925  
 926  
 927  
 928  
 929  
 930  
 931  
 932  
 933  
 934  
 935  
 936  
 937  
 938  
 939  
 940  
 941  
 942  
 943  
 944  
 945  
 946  
 947  
 948  
 949  
 950  
 951  
 952  
 953  
 954  
 955  
 956  
 957  
 958  
 959  
 960

**Figure 8**

(A) M41 versus Mock downregulated

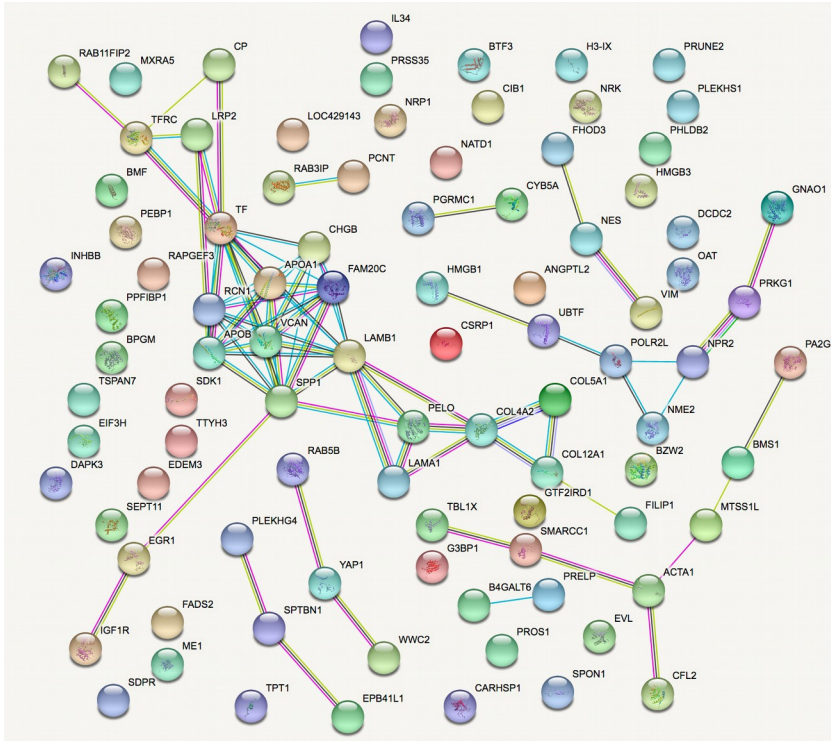

(B) M41 versus Mock upregulated

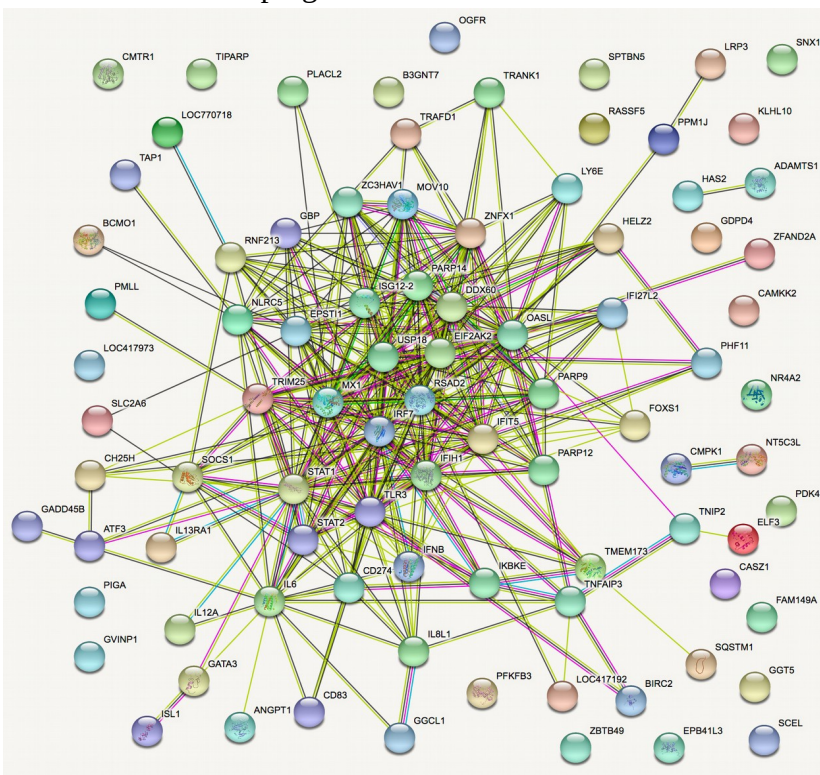

961  
962  
963  
964

965  
966  
967  
968  
969

| Type            | Condition          | Total      | De-duplicated | viral gRNA |       | host mRNA |
|-----------------|--------------------|------------|---------------|------------|-------|-----------|
|                 |                    |            |               | fwd        | rev   |           |
| <b>Repeat 1</b> |                    |            |               |            |       |           |
| RiboSeq         | Beaudette-infected | 55,648,104 | 32,461,160    | 1,470,253  | 630   | 3,070,823 |
|                 | M41-infected       | 47,459,412 | 24,416,659    | 1,838,613  | 792   | 4,193,904 |
|                 | Mock-infected      | 46,640,167 | 26,170,072    | 399        | 1     | 9,400,391 |
| RNASeq          | Beaudette-infected | 27,720,370 | 12,171,506    | 2,365,784  | 4,842 | 882,421   |
|                 | M41-infected       | 24,939,168 | 14,070,349    | 1,829,331  | 4,070 | 1,616,990 |
|                 | Mock-infected      | 25,036,626 | 15,462,396    | 2,737      | 9     | 2,037,543 |
| <b>Repeat 2</b> |                    |            |               |            |       |           |
| RiboSeq         | Beaudette-infected | 55,392,595 | 30,089,677    | 778,394    | 191   | 3,017,330 |
|                 | M41-infected       | 51,319,886 | 27,664,513    | 540,016    | 63    | 1,978,766 |
|                 | Mock-infected      | 56,813,327 | 26,535,892    | 159        | 1     | 3,413,589 |
| RNASeq          | Beaudette-infected | 26,792,717 | 15,637,095    | 2,606,240  | 8,245 | 1,840,748 |
|                 | M41-infected       | 46,163,533 | 2,680,836     | 106,741    | 388   | 127,579   |
|                 | Mock-infected      | 26,095,361 | 15,802,166    | 4,589      | 8     | 1,920,949 |

970  
971  
972  
973  
974  
975  
976  
977  
978  
979

**Table S1.** Library composition statistics: table of read counts per library. Random 7nt sequences were added to the ends of both 5' and 3' adaptors during library preparation to facilitate the removal of duplicate reads introduced during PCR. All libraries were de-duplicated following the removal of the adaptor sequences, as described in the Materials and Methods section. Numbers of reads mapped to the forward (fwd) and reverse (rev) strands of the viral gRNA are shown separately in each case; only forward strand-mapping reads are included in the host mRNA counts.



980

| TRS      | Genomic TRS sequence      | No. reads rep. 1 | No. reads rep. 2 | % rep. 1 | % rep. 2 |
|----------|---------------------------|------------------|------------------|----------|----------|
| S [U3]   | AAAAC <b>UGAACAA</b> AAGA | 176              | 158              | 2.58     | 1.53     |
| S [G3]   | AAAAC <b>UGAACAA</b> AAGA | 129              | 120              | 1.89     | 1.16     |
| S (int.) | CAAAC <b>UUACCAA</b> ACAA | 15               | 12               | 0.22     | 0.12     |
| 3/E [U3] | GUAAC <b>UGAACAA</b> UACA | 93               | 97               | 1.36     | 0.94     |
| 3/E [G3] | GUAAC <b>UGAACAA</b> UACA | 140              | 125              | 2.05     | 1.21     |
| M        | AAAAC <b>UUAACAA</b> UCCG | 571              | 569              | 8.36     | 5.50     |
| 4a/4b    | ACUGG <b>UGACCAA</b> AGCG | 109              | 147              | 1.60     | 1.42     |
| 5_1      | UUUAC <b>UUACAAA</b> AAC  | 81               | 189              | 1.19     | 1.83     |
| 5_2      | AAAAC <b>UUACAA</b> AUAC  | 1,085            | 2,237            | 15.88    | 21.63    |
| N        | CUUU <b>CUAACAA</b> AGCA  | 4,376            | 6,643            | 64.05    | 64.24    |
| dORF     | UUUGAG <b>UAACAU</b> AAUG | 57               | 44               | 0.83     | 0.43     |

981

982

983 **Table S2. (A)** Chimeric TRS-spanning reads identified in IBV Beaudette samples. Residues  
 984 matching the leader TRS (TRS-L) are shown in bold.

985

986

| TRS      | Genomic TRS sequence      | No. reads rep. 1 | No. reads rep. 2 | % rep. 1 | % rep. 2 |
|----------|---------------------------|------------------|------------------|----------|----------|
| S [U3]   | AAAAC <b>UGAACAA</b> AAGA | 200              | 9                | 5.21     | 6.34     |
| S [G3]   | AAAAC <b>UGAACAA</b> AAGA | 250              | 12               | 6.51     | 8.45     |
| S (int.) | CAAAC <b>UUACCAA</b> ACAC | 1                | 0                | 0.03     | 0        |
| 3/E [U3] | GUAAC <b>UUAACAA</b> UACA | 182              | 2                | 4.74     | 1.41     |
| 3/E [G3] | GUAAC <b>UUAACAA</b> UACA | 0                | 0                | 0        | 0        |
| M        | AAAAC <b>UUAACAA</b> UCCG | 877              | 46               | 22.83    | 32.39    |
| 4a/4b    | ACUGG <b>UGACCAA</b> AGCG | 303              | 11               | 7.89     | 7.75     |
| 5_2      | AGCG <b>CUUAAU</b> AAUAC  | 464              | 8                | 12.08    | 5.63     |
| N        | CUUU <b>CUAACAA</b> AGCA  | 1565             | 54               | 40.74    | 38.03    |

987

988

989 **Table S2. (B)** Chimeric TRS-spanning reads identified in IBV M41 samples. Residues matching the  
 990 leader TRS (TRS-L) are shown in bold.

991

992

993

994

995

996

997

| GO.ID      | Term                                                            | Annotated | Significant | Expected | P-value               |
|------------|-----------------------------------------------------------------|-----------|-------------|----------|-----------------------|
| GO:0010469 | regulation of signaling receptor activity                       | 53        | 7           | 0.58     | $1.2 \times 10^{-6}$  |
| GO:0048661 | positive regulation of smooth muscle cell proliferation         | 18        | 5           | 0.2      | $3.5 \times 10^{-5}$  |
| GO:2000352 | negative regulation of endothelial cell apoptotic process       | 9         | 3           | 0.1      | $9.7 \times 10^{-5}$  |
| GO:0060585 | positive regulation of prostaglandin-endoperoxide synthase      | 2         | 2           | 0.02     | $1.2 \times 10^{-4}$  |
| GO:0033141 | positive regulation of peptidyl-serine phosphorylation of ST... | 2         | 2           | 0.02     | $1.2 \times 10^{-4}$  |
| GO:0014826 | vein smooth muscle contraction                                  | 2         | 2           | 0.02     | $1.2 \times 10^{-4}$  |
| GO:1900625 | positive regulation of monocyte aggregation                     | 2         | 2           | 0.02     | $1.2 \times 10^{-4}$  |
| GO:0014824 | artery smooth muscle contraction                                | 3         | 2           | 0.03     | $3.5 \times 10^{-4}$  |
| GO:0003100 | regulation of systemic arterial blood pressure by endothelin    | 3         | 2           | 0.03     | $3.5 \times 10^{-4}$  |
| GO:1901842 | negative regulation of high voltage-gated calcium channel ac... | 3         | 2           | 0.03     | $3.5 \times 10^{-4}$  |
| GO:0006955 | immune response                                                 | 244       | 12          | 2.66     | $5.9 \times 10^{-4}$  |
| GO:1904754 | positive regulation of vascular associated smooth muscle cel... | 4         | 2           | 0.04     | $6.9 \times 10^{-4}$  |
| GO:0071356 | cellular response to tumor necrosis factor                      | 40        | 4           | 0.44     | $8.4 \times 10^{-4}$  |
| GO:0043154 | negative regulation of cysteine-type endopeptidase activity ... | 18        | 3           | 0.2      | $8.8 \times 10^{-4}$  |
| GO:0001516 | prostaglandin biosynthetic process                              | 8         | 3           | 0.09     | $1.09 \times 10^{-3}$ |
| GO:0071498 | cellular response to fluid shear stress                         | 8         | 3           | 0.09     | $1.09 \times 10^{-3}$ |
| GO:0002931 | response to ischemia                                            | 5         | 2           | 0.05     | $1.14 \times 10^{-3}$ |
| GO:0090051 | negative regulation of cell migration involved in sprouting ... | 5         | 2           | 0.05     | $1.14 \times 10^{-3}$ |
| GO:0019229 | regulation of vasoconstriction                                  | 5         | 2           | 0.05     | $1.14 \times 10^{-3}$ |
| GO:0070373 | negative regulation of ERK1 and ERK2 cascade                    | 22        | 3           | 0.24     | $1.16 \times 10^{-3}$ |

998

999 **Table S3.** Top 20 most significantly enriched GO terms among genes which are down-regulated in  
1000 IBV M41-infected cells relative to IBV Beaudette-infected cells. Column “Annotated” shows the  
1001 total number of genes in the data set which are members of that GO term; “Significant” shows the

1002 number that are significantly differentially expressed; and “Expected” shows the proportion of  
1003 genes that would be expected to occur in a random sample.

1004

1005

1006

1007

1008

| GO.ID      | Term                                                            | Annotated | Significant | Expected | P-value               |
|------------|-----------------------------------------------------------------|-----------|-------------|----------|-----------------------|
| GO:0042026 | protein refolding                                               | 7         | 2           | 0.01     | $4.4 \times 10^{-5}$  |
| GO:0051085 | chaperone cofactor-dependent protein refolding                  | 9         | 2           | 0.01     | $7.6 \times 10^{-5}$  |
| GO:0034605 | cellular response to heat                                       | 17        | 2           | 0.03     | $2.9 \times 10^{-4}$  |
| GO:0090074 | negative regulation of protein homodimerization activity        | 1         | 1           | 0        | $1.6 \times 10^{-3}$  |
| GO:1905719 | protein localization to perinuclear region of cytoplasm         | 1         | 1           | 0        | $1.6 \times 10^{-3}$  |
| GO:1903895 | negative regulation of IRE1-mediated unfolded protein respon... | 1         | 1           | 0        | $1.6 \times 10^{-3}$  |
| GO:0070194 | synaptonemal complex disassembly                                | 1         | 1           | 0        | $1.6 \times 10^{-3}$  |
| GO:0006880 | intracellular sequestering of iron ion                          | 1         | 1           | 0        | $1.6 \times 10^{-3}$  |
| GO:0034620 | cellular response to unfolded protein                           | 36        | 3           | 0.06     | $2.5 \times 10^{-3}$  |
| GO:1902949 | positive regulation of tau-protein kinase activity              | 2         | 1           | 0        | $3.2 \times 10^{-3}$  |
| GO:1903071 | positive regulation of ER-associated ubiquitin-dependent pro... | 2         | 1           | 0        | $3.19 \times 10^{-3}$ |
| GO:1901896 | positive regulation of calcium-transporting ATPase activity     | 2         | 1           | 0        | $3.19 \times 10^{-3}$ |
| GO:0090084 | negative regulation of inclusion body assembly                  | 3         | 1           | 0        | $4.78 \times 10^{-3}$ |
| GO:1905323 | telomerase holoenzyme complex assembly                          | 3         | 1           | 0        | $4.78 \times 10^{-3}$ |
| GO:0044130 | negative regulation of growth of symbiont in host               | 3         | 1           | 0        | $4.78 \times 10^{-3}$ |
| GO:0007141 | male meiosis I                                                  | 3         | 1           | 0        | $4.78 \times 10^{-3}$ |
| GO:0031396 | regulation of protein ubiquitination                            | 73        | 2           | 0.12     | $5.31 \times 10^{-3}$ |
| GO:0035973 | aggrephagy                                                      | 4         | 1           | 0.01     | $6.38 \times 10^{-3}$ |
| GO:0061635 | regulation of protein complex stability                         | 4         | 1           | 0.01     | $6.38 \times 10^{-3}$ |
| GO:1900273 | positive regulation of long-term synaptic potentiation          | 4         | 1           | 0.01     | $6.38 \times 10^{-3}$ |

1009

1010

1011 **Table S4.** Top 20 most significantly enriched GO terms among genes which are up-regulated in  
1012 IBV M41-infected cells relative to IBV Beaudette-infected cells. Column “Annotated” shows the  
1013 total number of genes in the data set which are members of that GO term; “Significant” shows the  
1014 number that are significantly differentially expressed; and “Expected” shows the proportion of  
1015 genes that would be expected to occur in a random sample.

1016

1017

1018

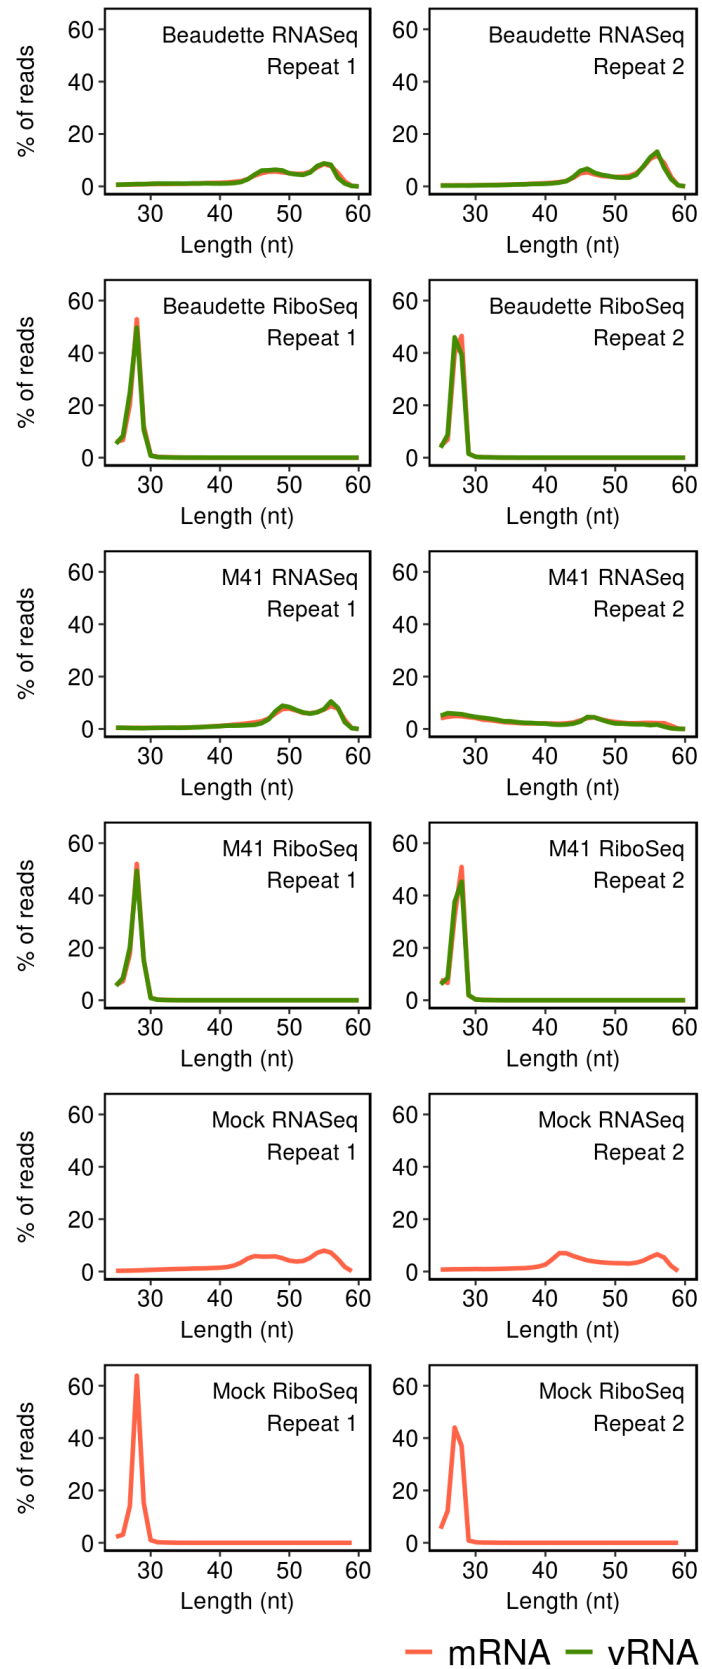

1020 **Figure S1.** Length distribution of reads mapped to the internal regions of protein-coding sequences  
1021 on viral RNA (vRNA; green lines) and host mRNA (red lines).

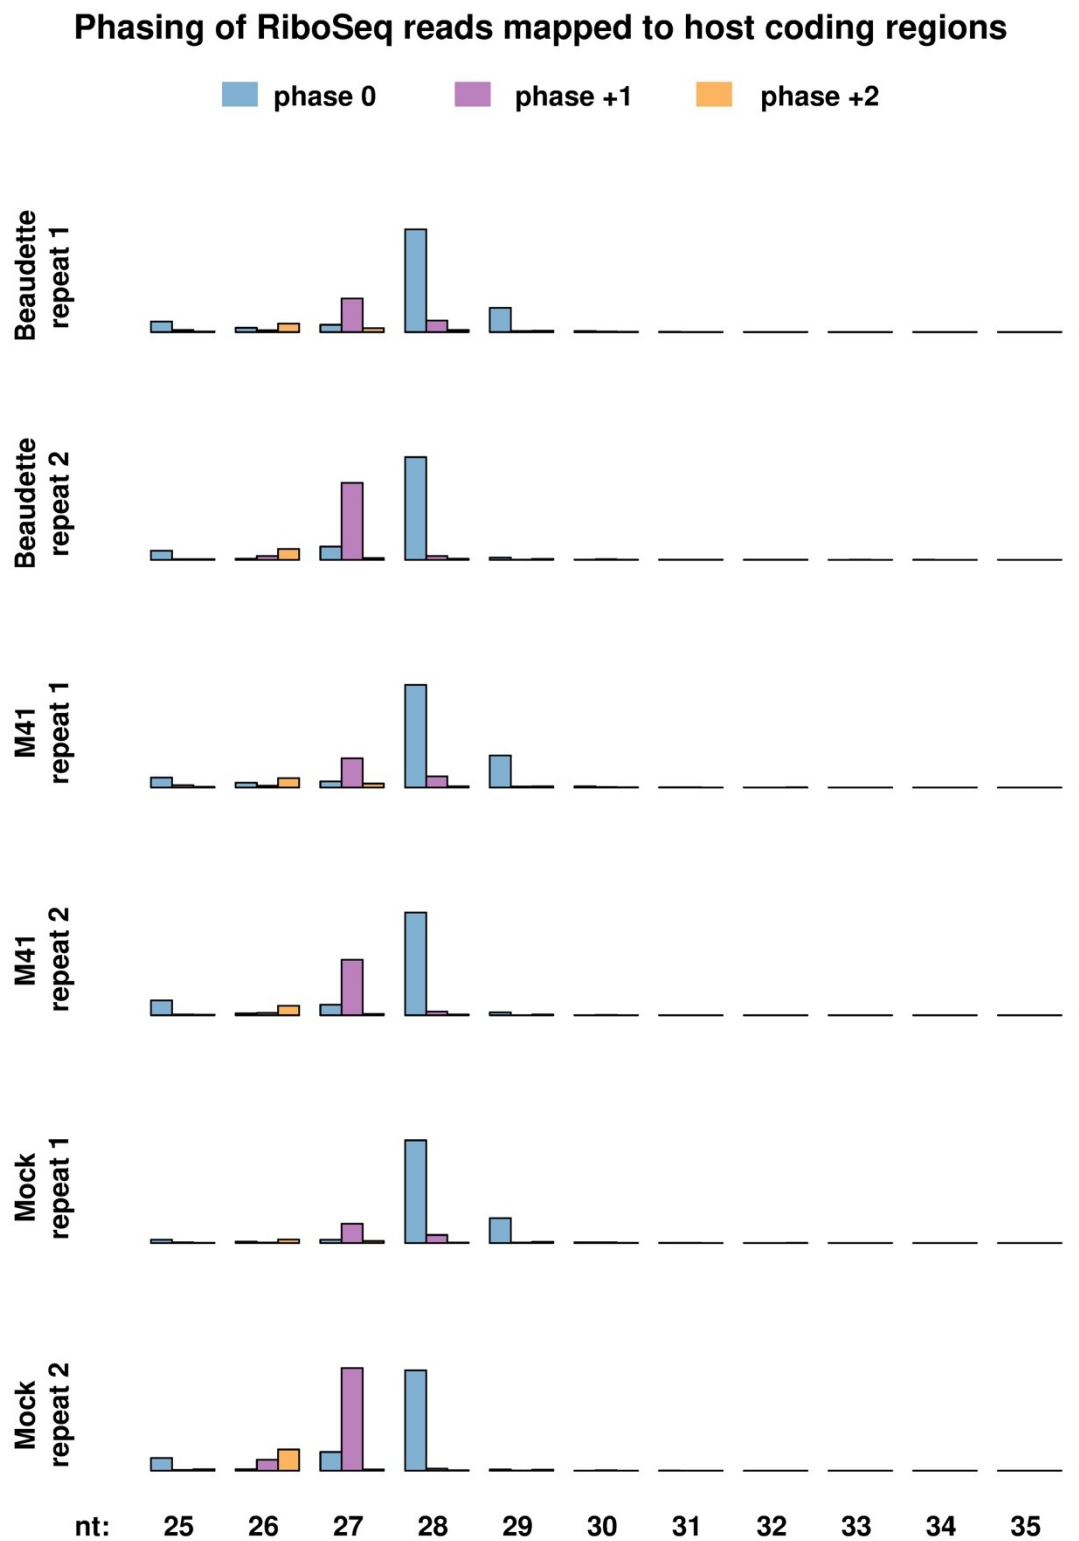

1022 **Figure S2.** Phasing of RiboSeq reads mapped to the internal regions of protein-coding sequences in  
1023 host mRNAs for different RPF lengths.

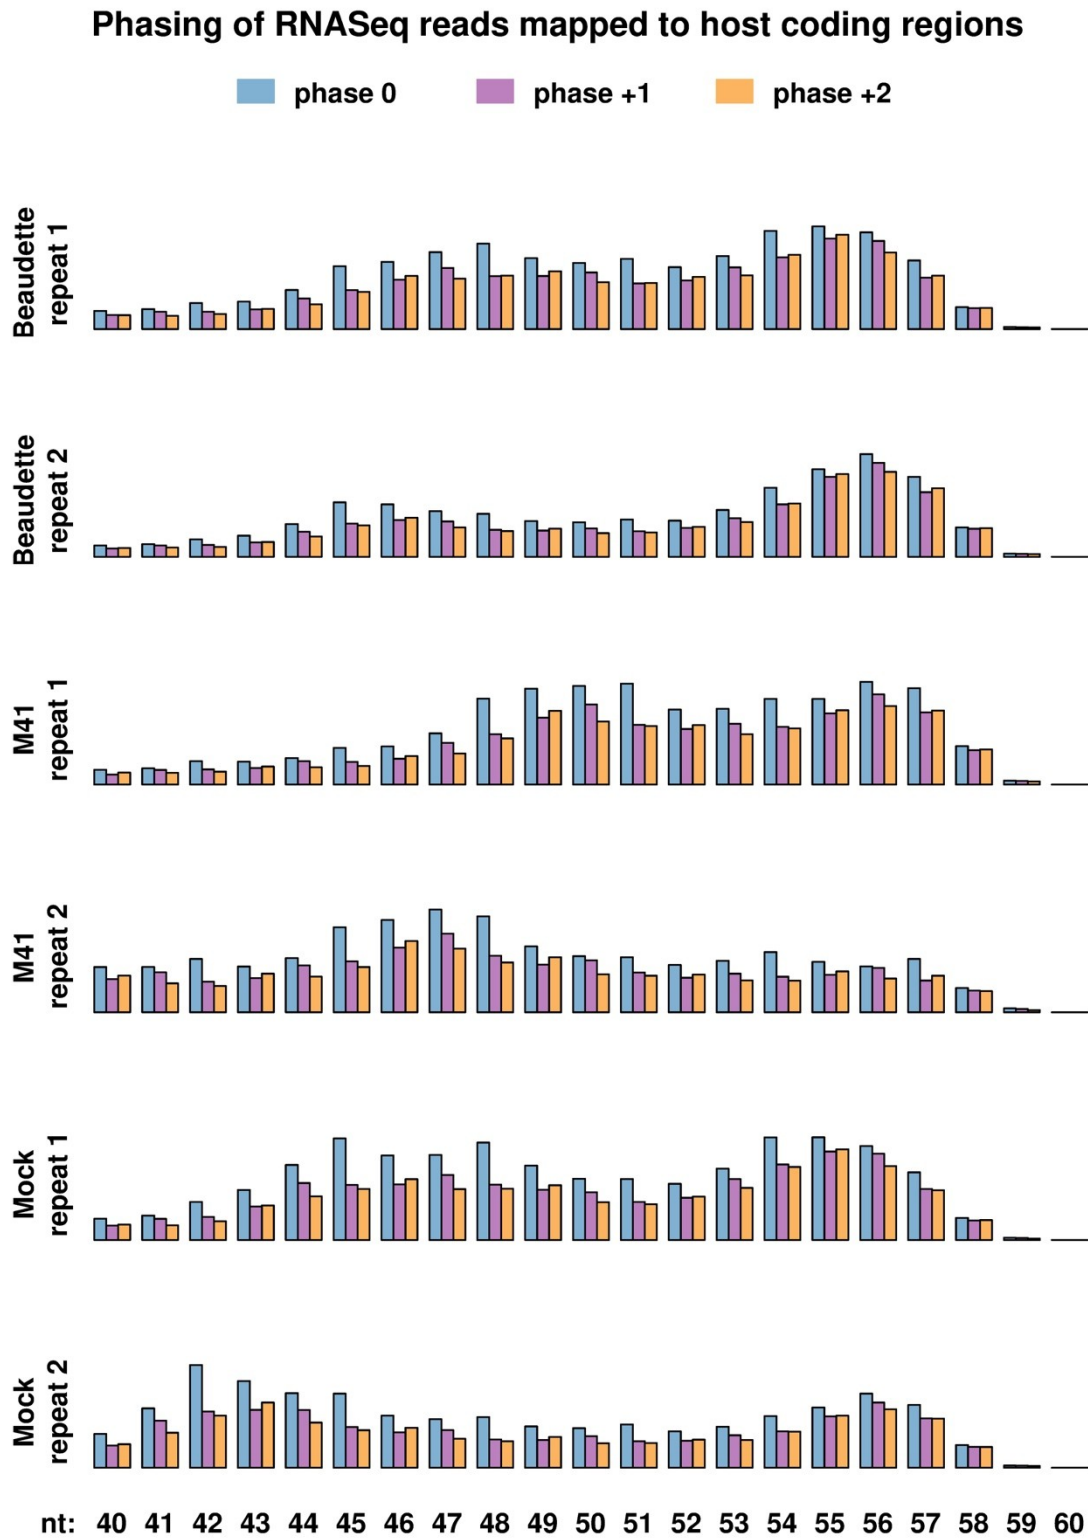

1025 **Figure S3.** Phasing of RNASeq reads mapped to the internal regions of protein coding sequences in  
1026 host mRNAs. To aid visualisation, only reads between 40 nt and 60 nt in length are shown.  
1027



1028  
1029

### RiboSeq 5' mapping positions relative to host start and stop codons

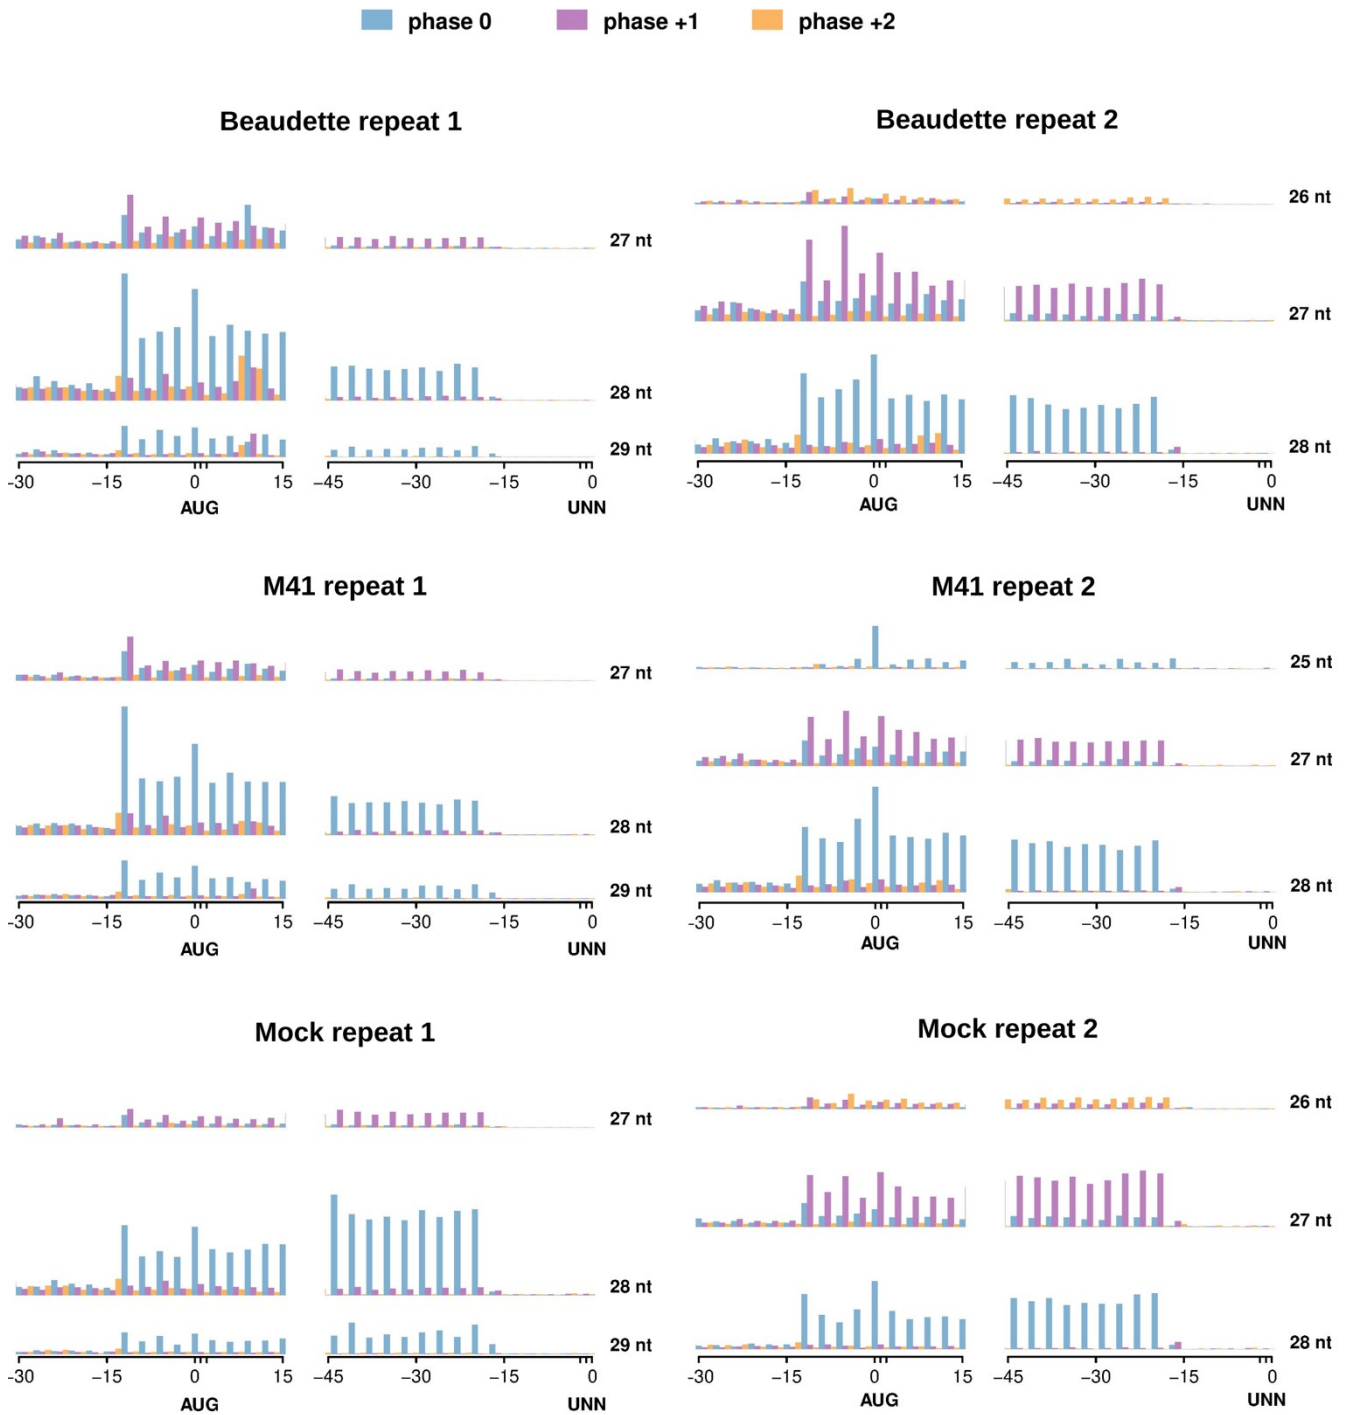

1031 **Figure S4.** Histograms of 5' mapping positions of RiboSeq reads relative to host mRNA start  
1032 (AUG) and stop (UNN) codons. Positions indicated are relative to the first nt of the AUG codon  
1033 (left) and the last nt of the UNN codon (right). The three most abundant read lengths are plotted for  
1034 each library.  
1035

## RiboSeq 5' mapping positions relative to host start and stop codons

■ phase 0    ■ phase +1    ■ phase +2

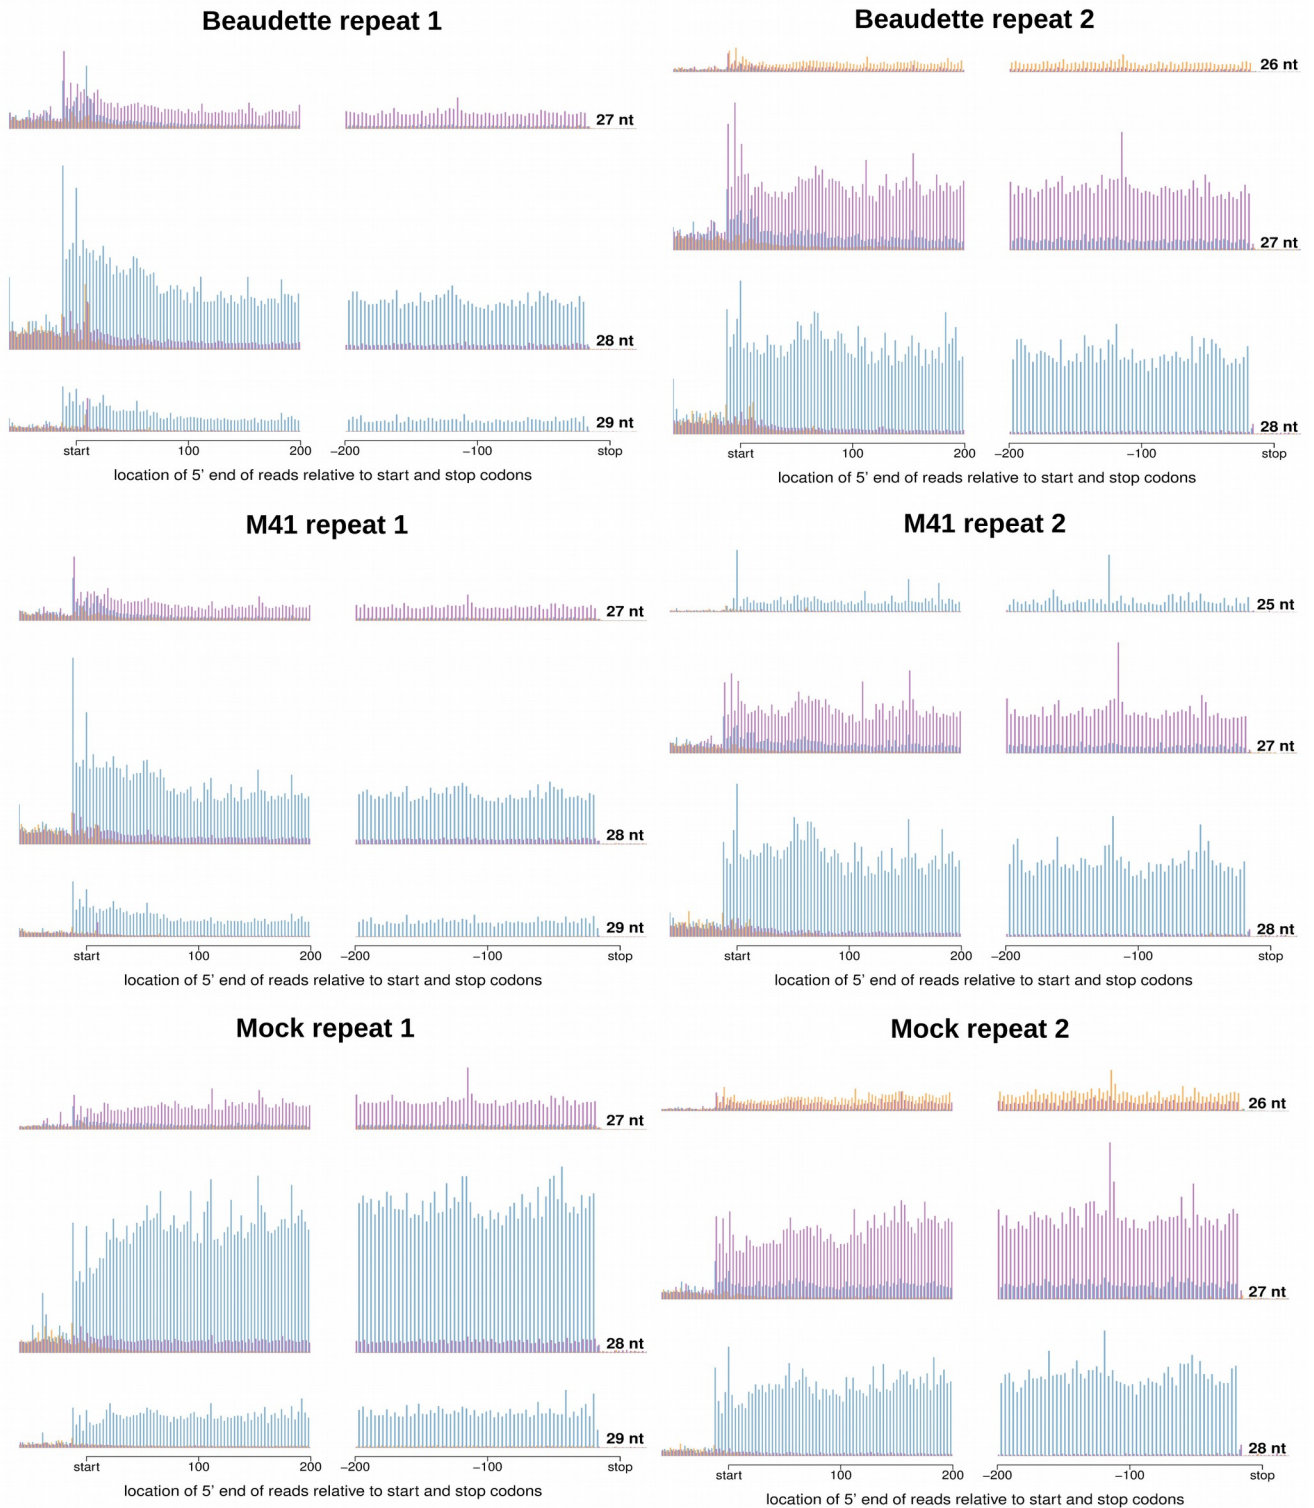

1037 **Figure S5.** Histograms of 5' mapping positions of RiboSeq reads relative to host mRNA start and  
1038 stop codons. The three most abundant read lengths are plotted for each library.

1039  
1040

## RNASeq 5' mapping positions relative to host start and stop codons

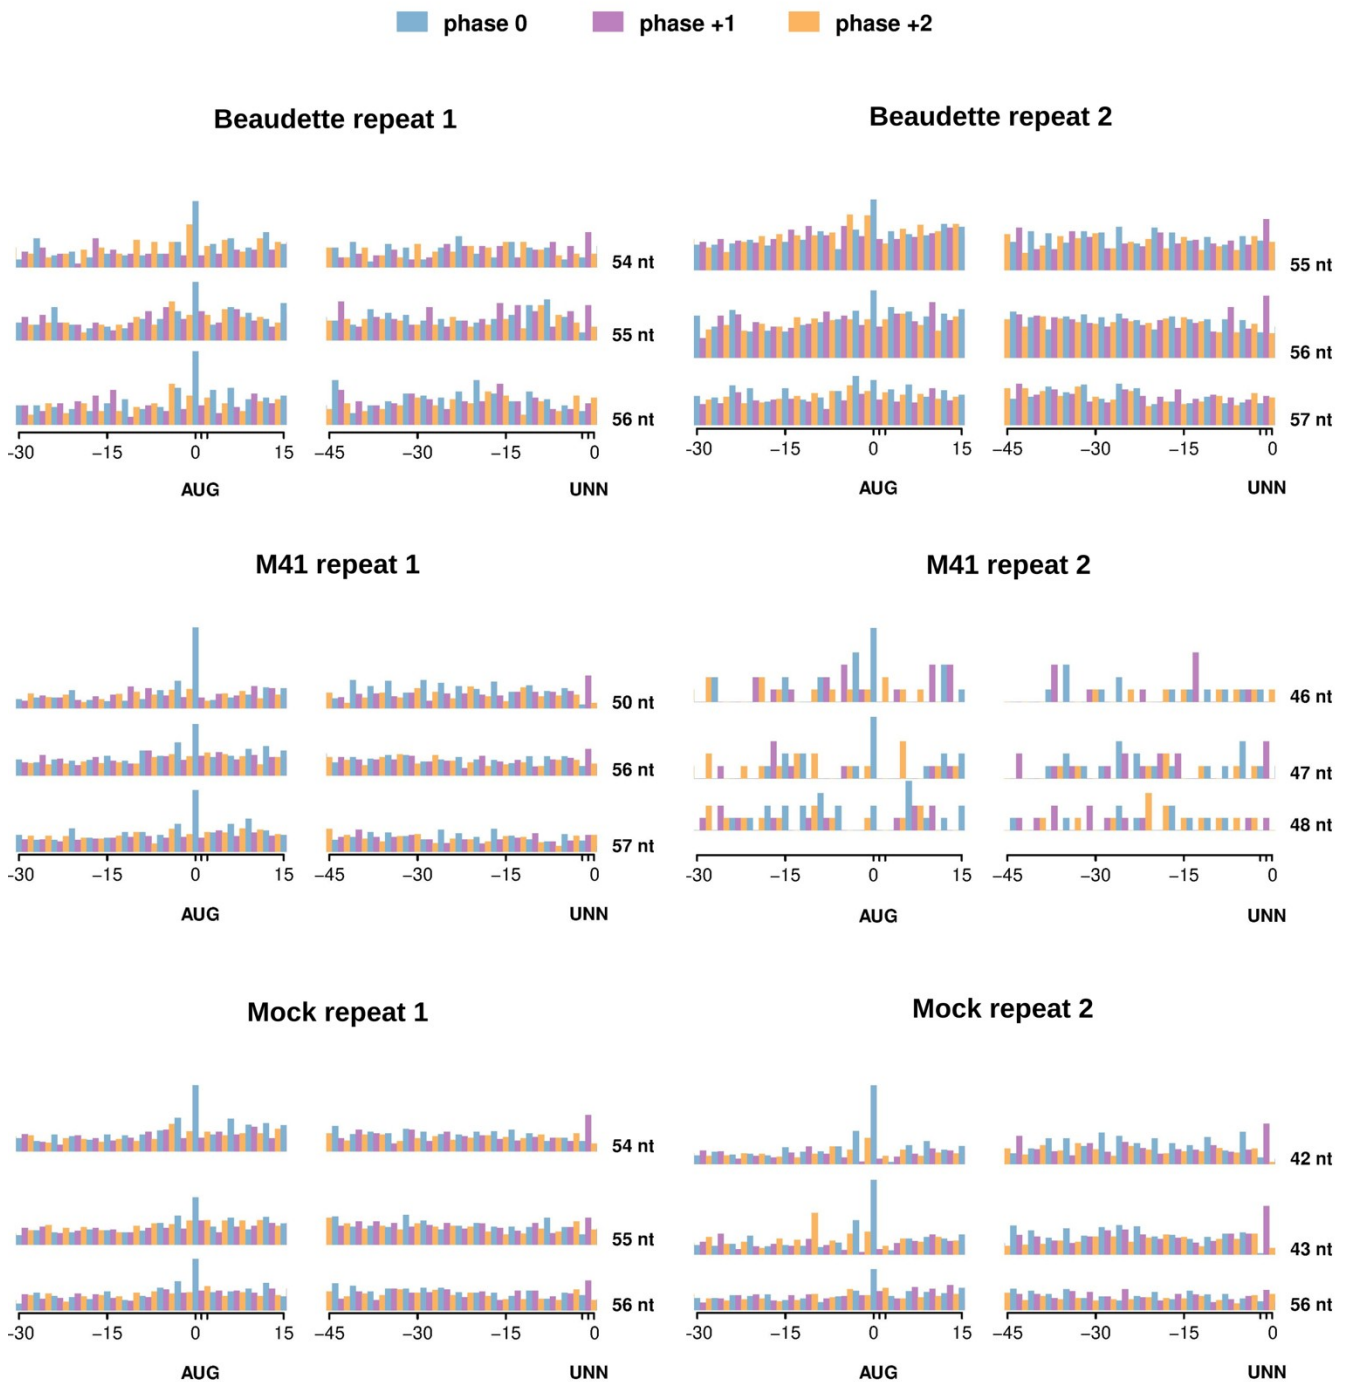

1042 **Figure S6.** Histograms of 5' mapping positions of RNASeq reads relative to host mRNA start  
1043 (AUG) and stop (UNN) codons. Positions indicated are relative to the first nt of the AUG codon  
1044 (left) and the last nt of the UNN codon (right). The three most abundant read lengths are plotted for  
1045 each library.

1046

### RNASeq 5' mapping positions relative to host start and stop codons

■ phase 0    ■ phase +1    ■ phase +2

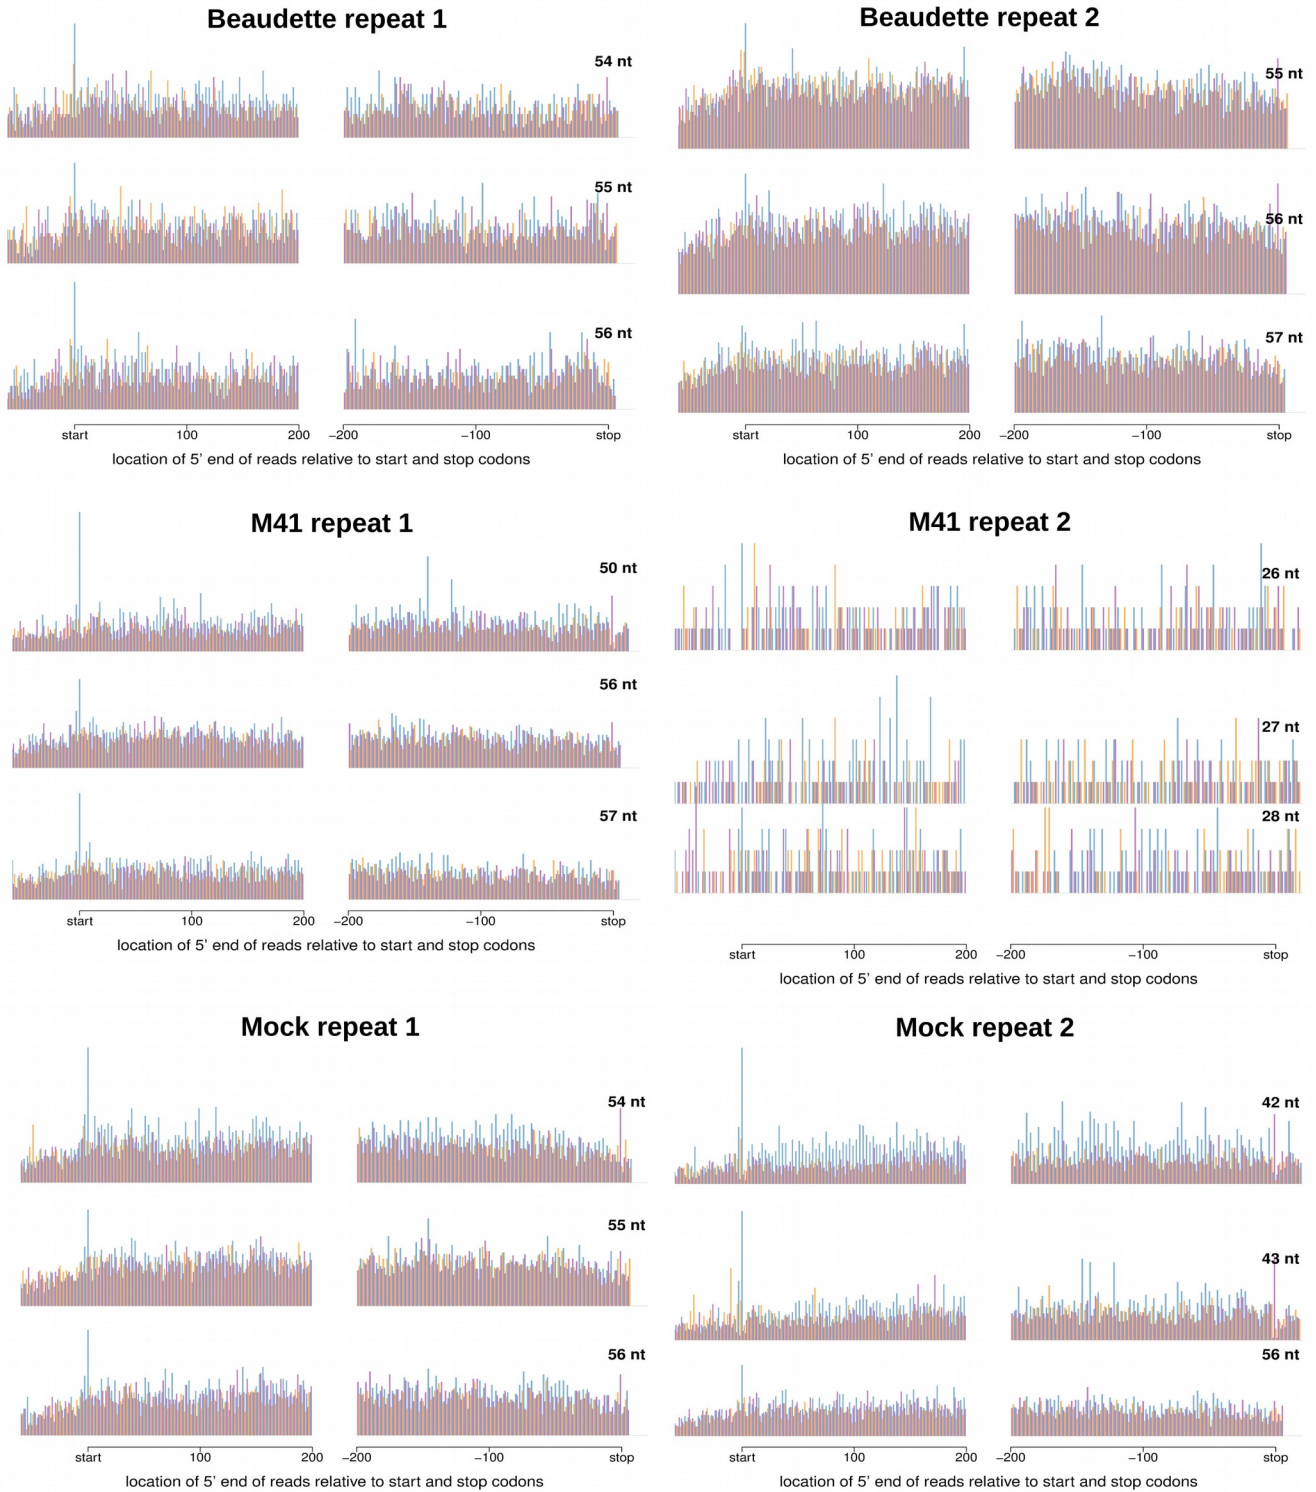

1048 **Figure S7.** Histograms of 5' mapping positions of RNASeq reads relative to host mRNA start and  
1049 stop codons. The three most abundant read lengths are plotted for each library.

1050

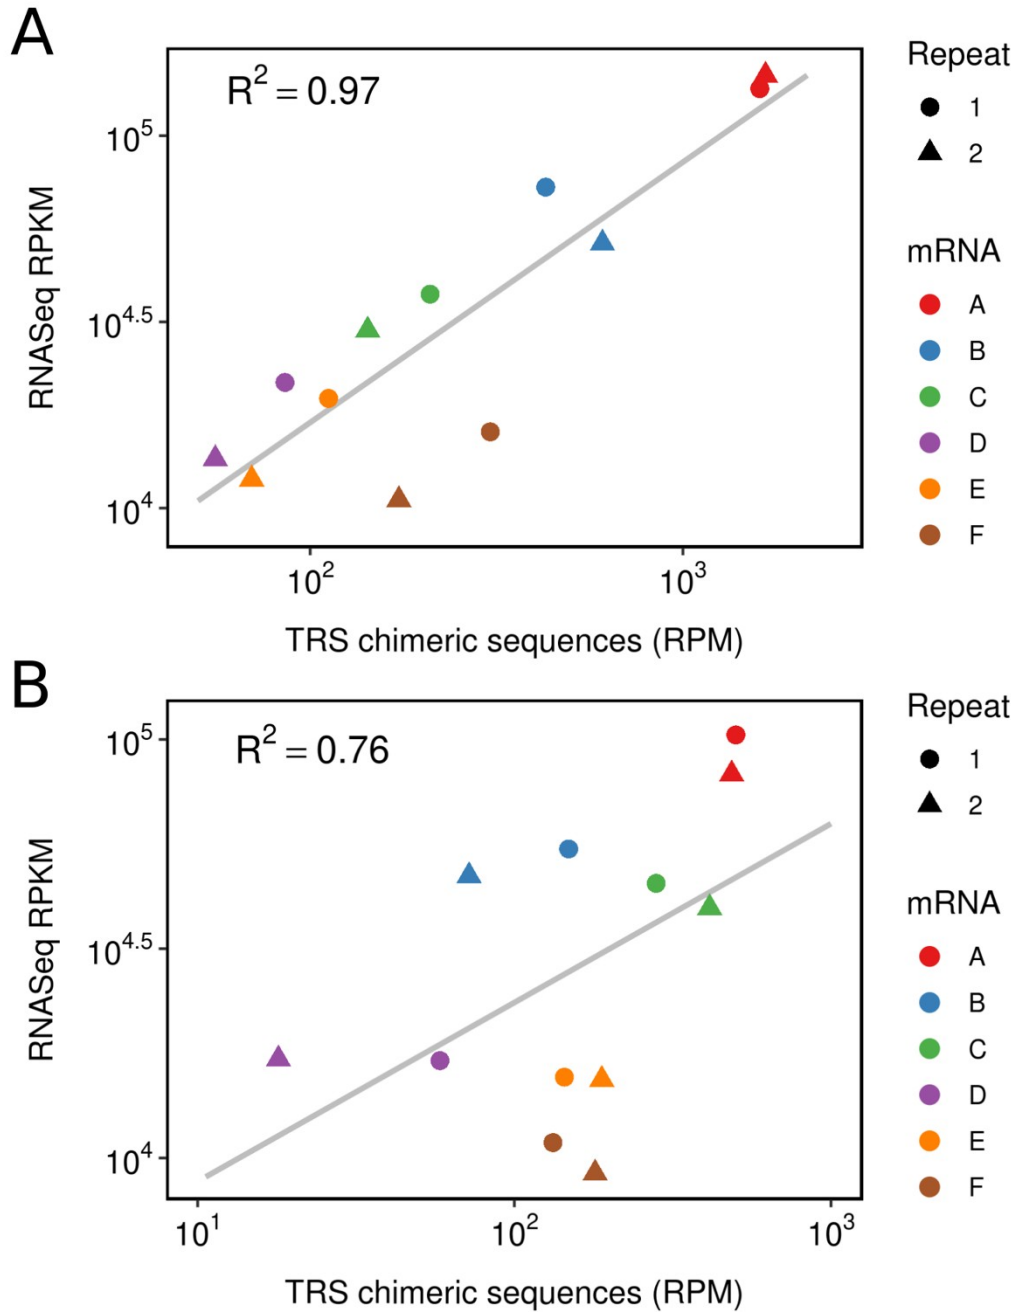

1052

1053

1054 **Figure S8.** Relative abundances of sgRNAs (mRNA A to E) and gRNA (mRNA F) for **(A)** IBV  
1055 Beaudette and **(B)** IBV M41, as measured by decumulating RNASeq coverage (see Methods) or by  
1056 counting chimeric reads spanning the TRS sequence. RNASeq densities are expressed as reads per  
1057 kilobase per million mapped reads (RPKM), and chimeric TRS-spanning reads are expressed as  
1058 reads per million mapped reads (RPM).

1059

1060  
1061  
1062  
1063  
1064

```

IBV B1648      CUUUACACAUAAAUGUGUGUGUGUAGAGAGUAUUUAAGAUUAUUCUUUGACAGUGCCUCU
IBV Beaudette  CUUUACACAUAAAUGUGUGUGUGUAGAGAGUAUUUAAAAUUAUUCUUUAAUAGCGCCUCU
IBV M41        CUUUACACAUAAAUGUGUGUGUGUAGAGAGUAUUUAAGACUAUUCUUUAAUAGUGCCUCU
                ***** * ***** * ** *****

IBV B1648      AUUUUAAGAGCGCGGAAGAGUAUUUUUUUGAGGAUAUUAAUUAUAAAUCCUCUUUGUUUC
IBV Beaudette  GUUUUAAGAGCGCAUAAGAGUAUUUUUUUGAGGAUACUAAUUAUAAAUCCUCUUUGUUUU
IBV M41        AUUUUAAGAGCGCAUACGAGUAUUUUUUUGAGGAUAUUAAUUAUAAAUCCUCUUUGUUUU
                ***** * ***** ***** ***** *****

IBV B1648      AUACUCUCCUUUCAGGAGUAUUUUUUAAAAACAGUUUUUCCACUCUUUUGUGCCAAA
IBV Beaudette  AUACUCUCCUUUCAAGAGCUA-----
IBV M41        AUACUCUCCUUUCAAGAGCUAUUUUUUUAAAAACAGUUUUUCCACUCUUUUGUGCCAAA
                ***** ***** *** **

IBV B1648      ACUAUUGUUGUCAAUGGUGUAACCUUUCAGUAGUAAUGGAAAAGUCUACUACGAAGGA
IBV Beaudette  -----UUAACGGUGUUACCUUUCAGUAGAUAAUGGAAAAGUCUACUACGAAGGA
IBV M41        ACUAUUGUUGUUAACGGUGUUACCUUUCAGUGGAUAAUGGAAAAGUCUACUACGAAGGA
                * ** ***** ***** ***** *****

```

1066  
1067  
1068  
1069  
1070  
1071  
1072  
1073  
1074  
1075  
1076  
1077  
1078  
1079  
1080  
1081  
1082  
1083  
1084  
1085  
1086  
1087  
1088

**Figure S9.** Alignment of IBV sequences, showing the positions of the ORF4b and ORF4c initiation codons (green). A 49-nt deletion in the Beaudette strain prematurely truncates the ORF4b gene by bringing a UAG codon (red) in frame. Note the absence of AUG codons between the starts of ORF4b and ORF4c in both IBV Beaudette and IBV M41, consistent with a leaky scanning mechanism for 4c expression. Conversely, the genome of the Belgian nephropathogenic strain B1648 contains an intervening AUG (underlined; 2-codon ORF) towards the 3' end of ORF4b.

1089

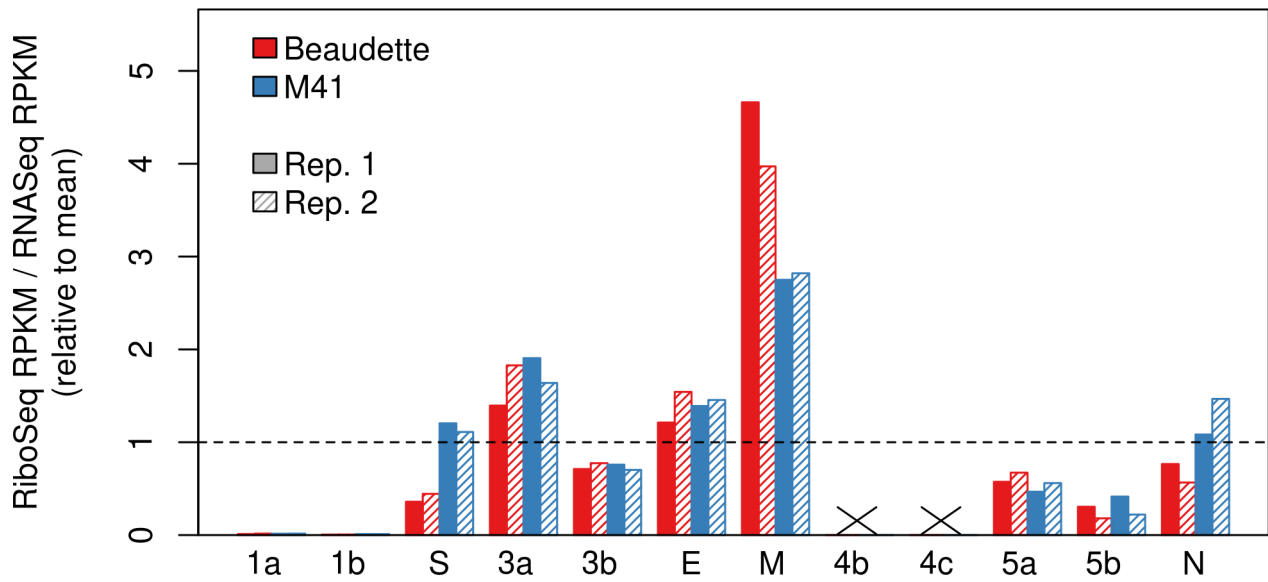

1091

1092 **Figure S10.** Viral gene translation efficiency values calculated using decumulated RNASEq reads  
1093 (expressed as reads per kilobase per million mapped reads [RPKM]). The ratio of RiboSeq RPKM  
1094 to RNASEq RPKM is plotted relative to the mean across all samples.

1095

1096

1097

1098

1099

1100

1101

1102

1103

1104

1105

1106

1107

1108

1109

1110

1111

1112

1113

1114

1115

1116

1117

1118

1119

1120 **Figure S11.** STRING analysis of the relationship between differentially expressed genes in  
1121 comparisons of IBV Beaudette, IBV M41 and mock-infected chick kidney cells (**panels A to I**). The  
1122 network nodes represent the proteins encoded by the differentially expressed genes. Seven different  
1123 coloured lines link a number of nodes and represent seven types of evidence used in predicting  
1124 associations. A red line indicates the presence of fusion evidence; a green line represents  
1125 neighborhood evidence; a blue line represents co-occurrence evidence; a purple line represents  
1126 experimental evidence; a yellow line represents text-mining evidence; a light blue line represents  
1127 database evidence; and a black line represents co-expression evidence.

1128  
1129  
1130  
1131  
1132  
1133  
1134  
1135  
1136  
1137  
1138  
1139  
1140  
1141  
1142  
1143  
1144  
1145  
1146  
1147  
1148  
1149  
1150  
1151  
1152  
1153  
1154  
1155



1156 (A) Beaudette vs Mock downregulated transcripts

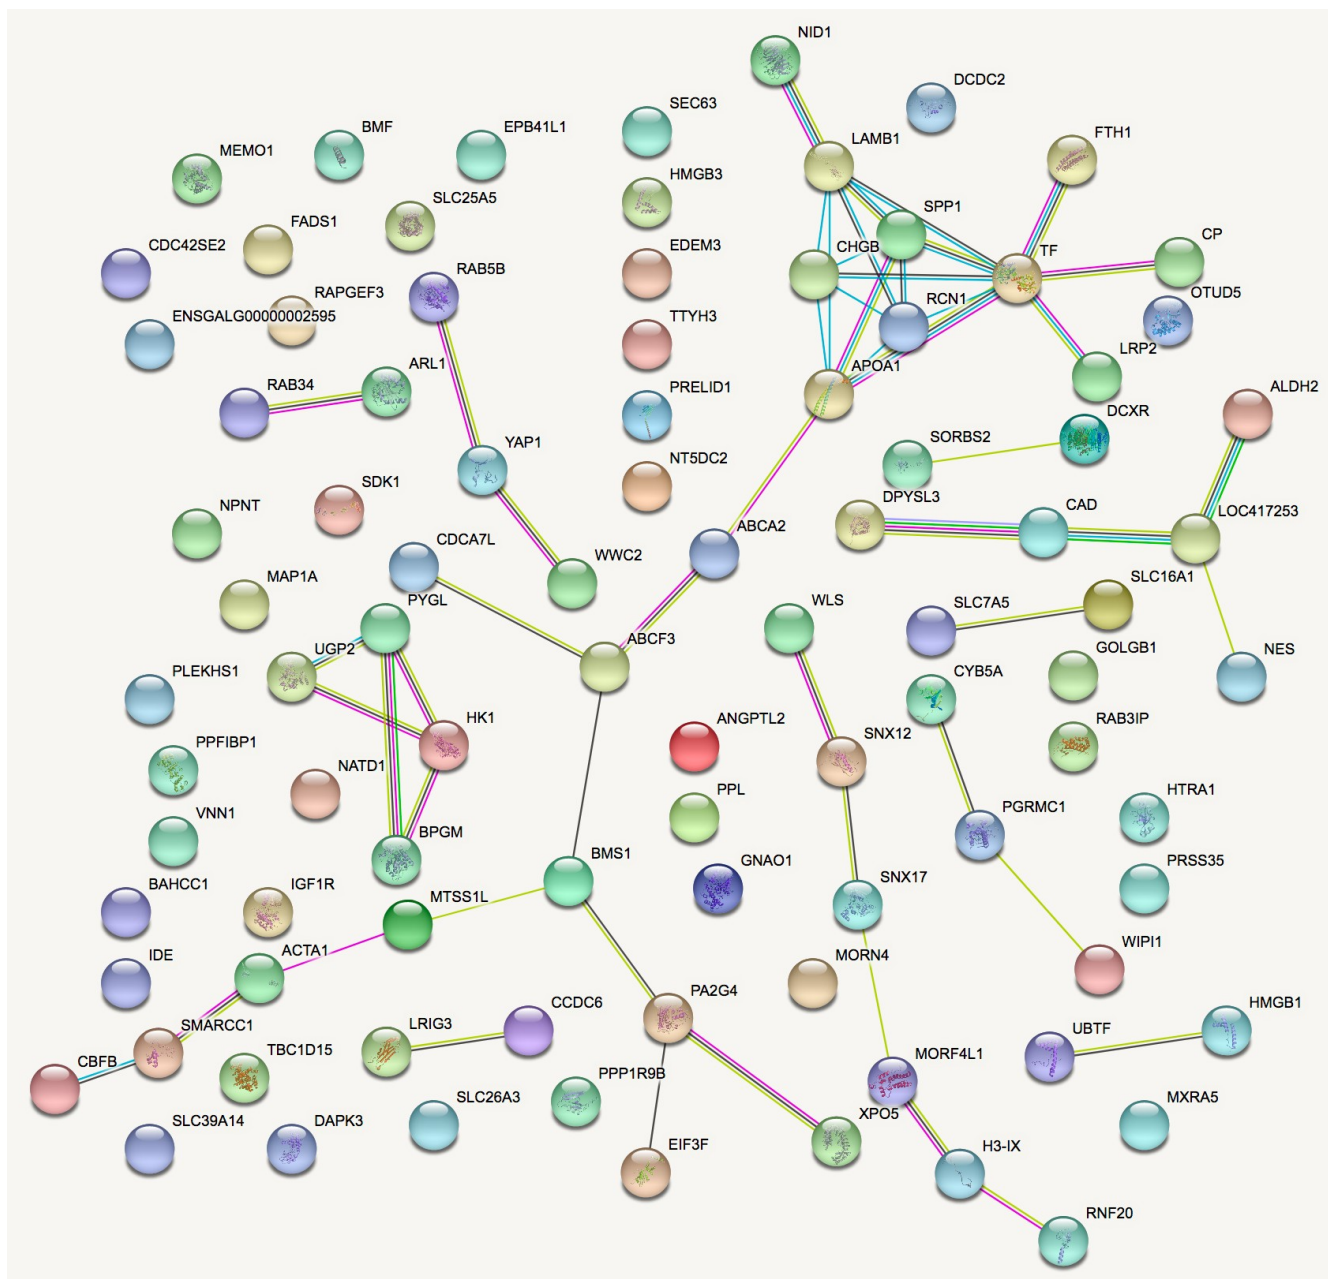

1158  
1159  
1160  
1161  
1162  
1163  
1164  
1165  
1166  
1167  
1168

1169 **(B)** M41 vs Mock downregulated transcripts

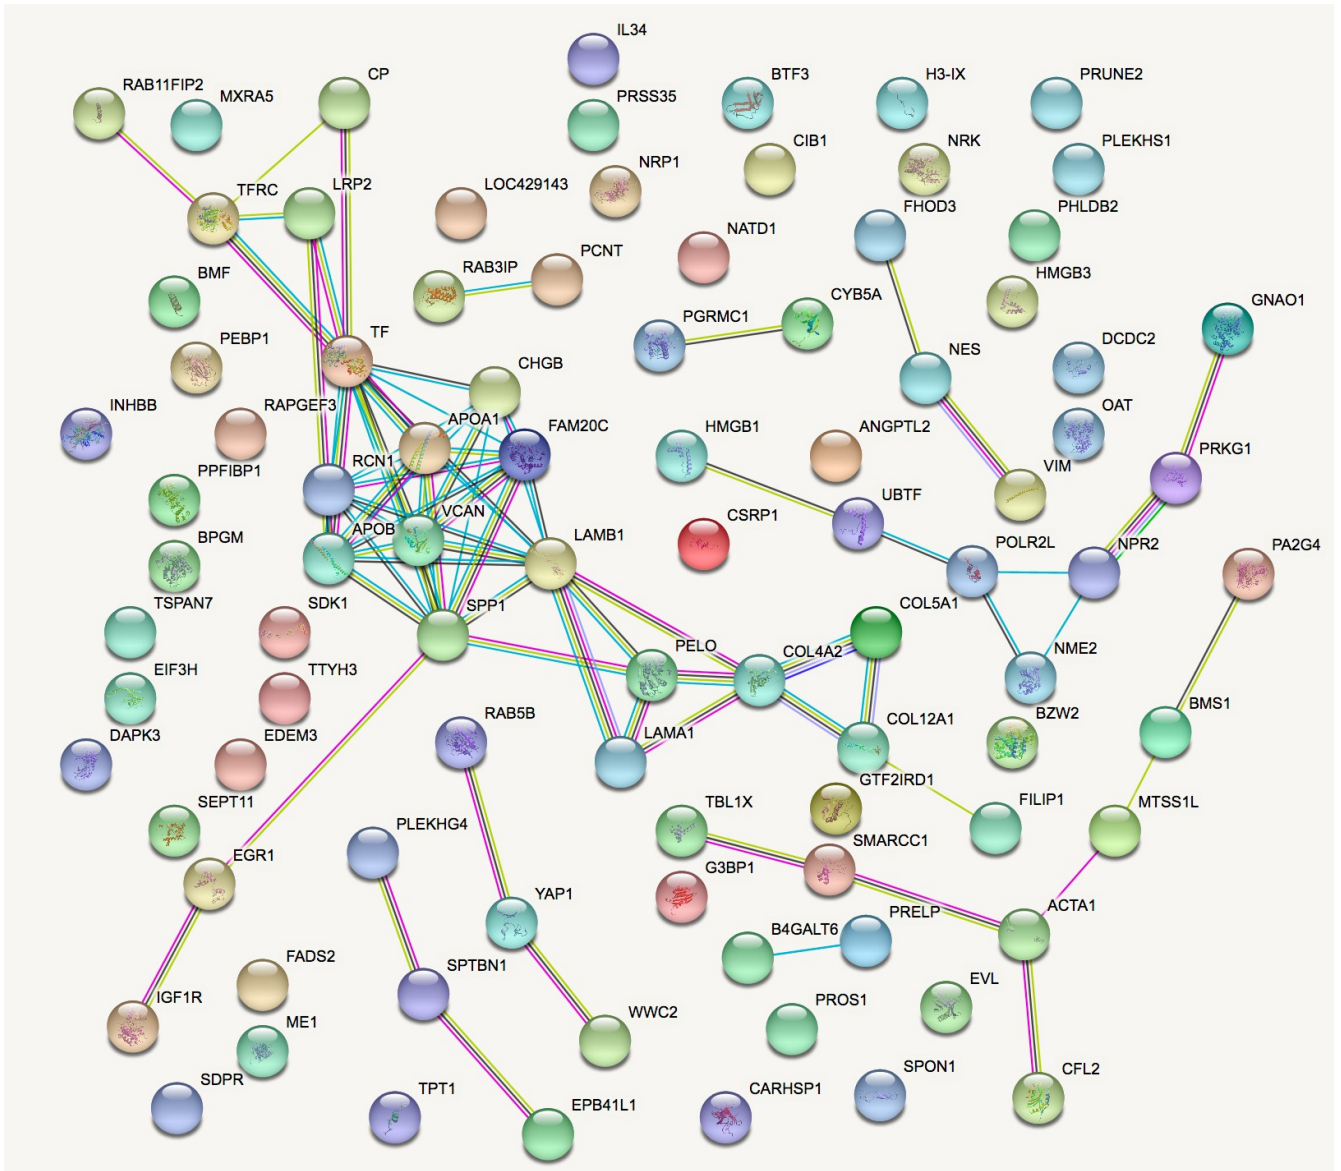

1171  
1172  
1173  
1174  
1175  
1176  
1177  
1178  
1179  
1180  
1181  
1182  
1183

1184

1185 (C) Beaudette vs Mock upregulated transcripts

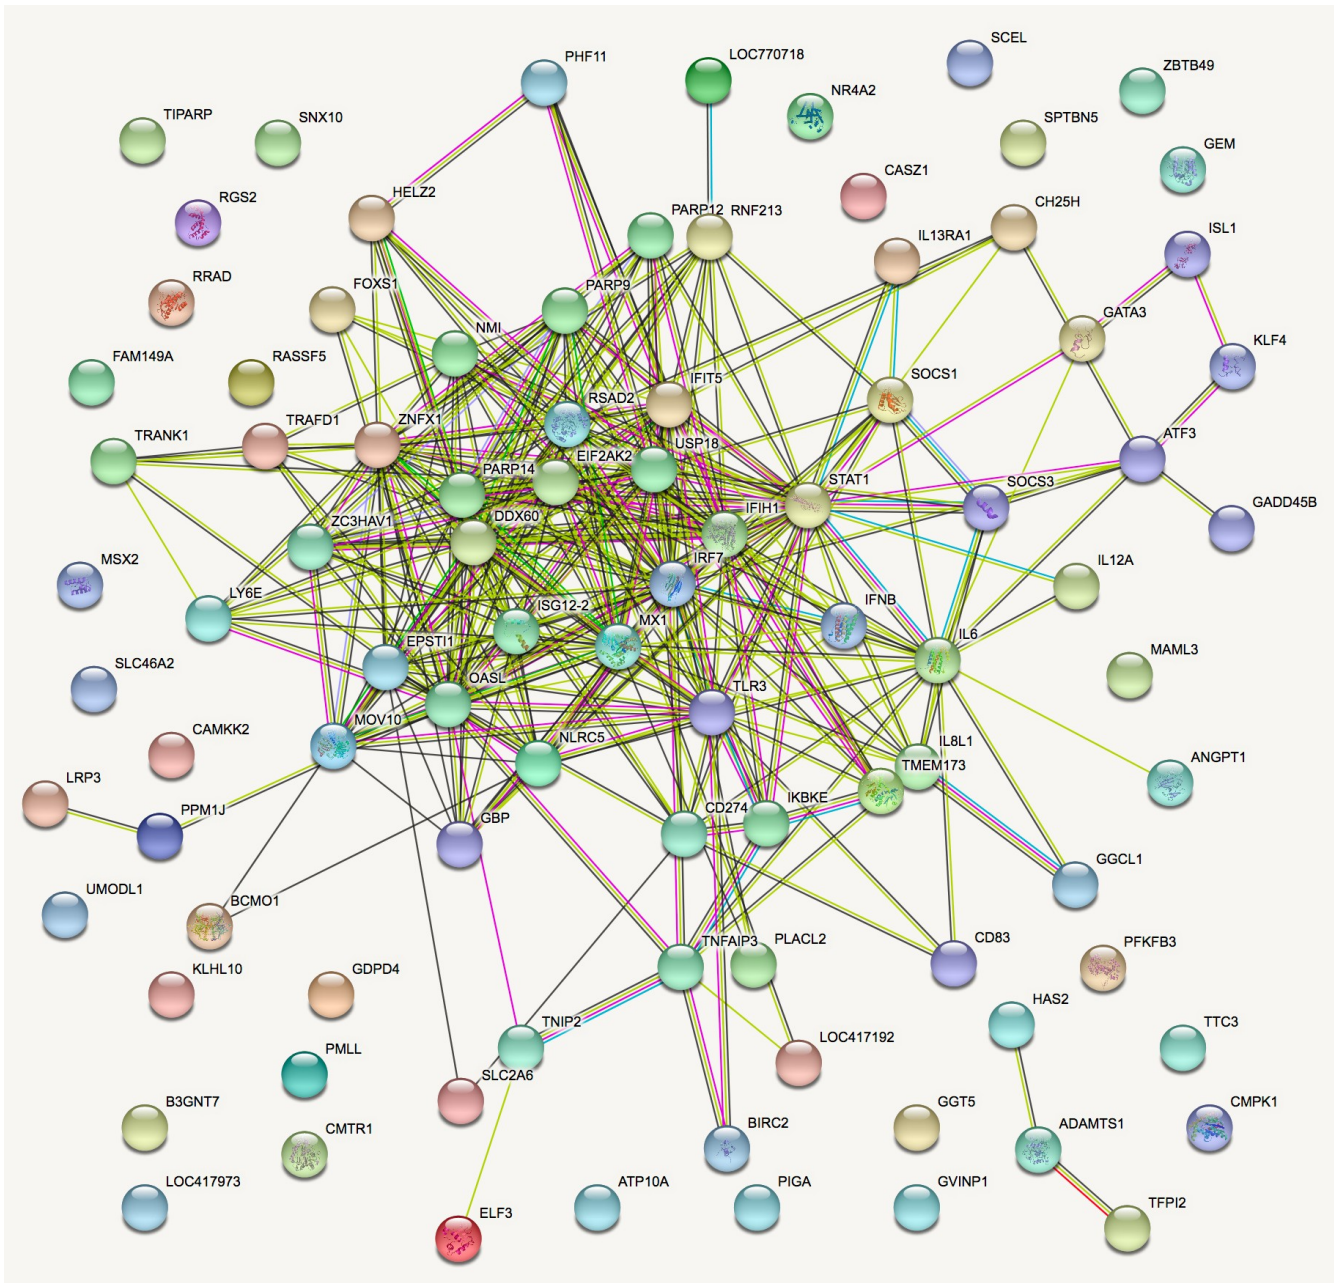

1187

1188

1189

1190

1191

1192

1193

1194

1195

1196  
1197  
1198  
1199

**(D)** M41 vs Mock upregulated transcripts

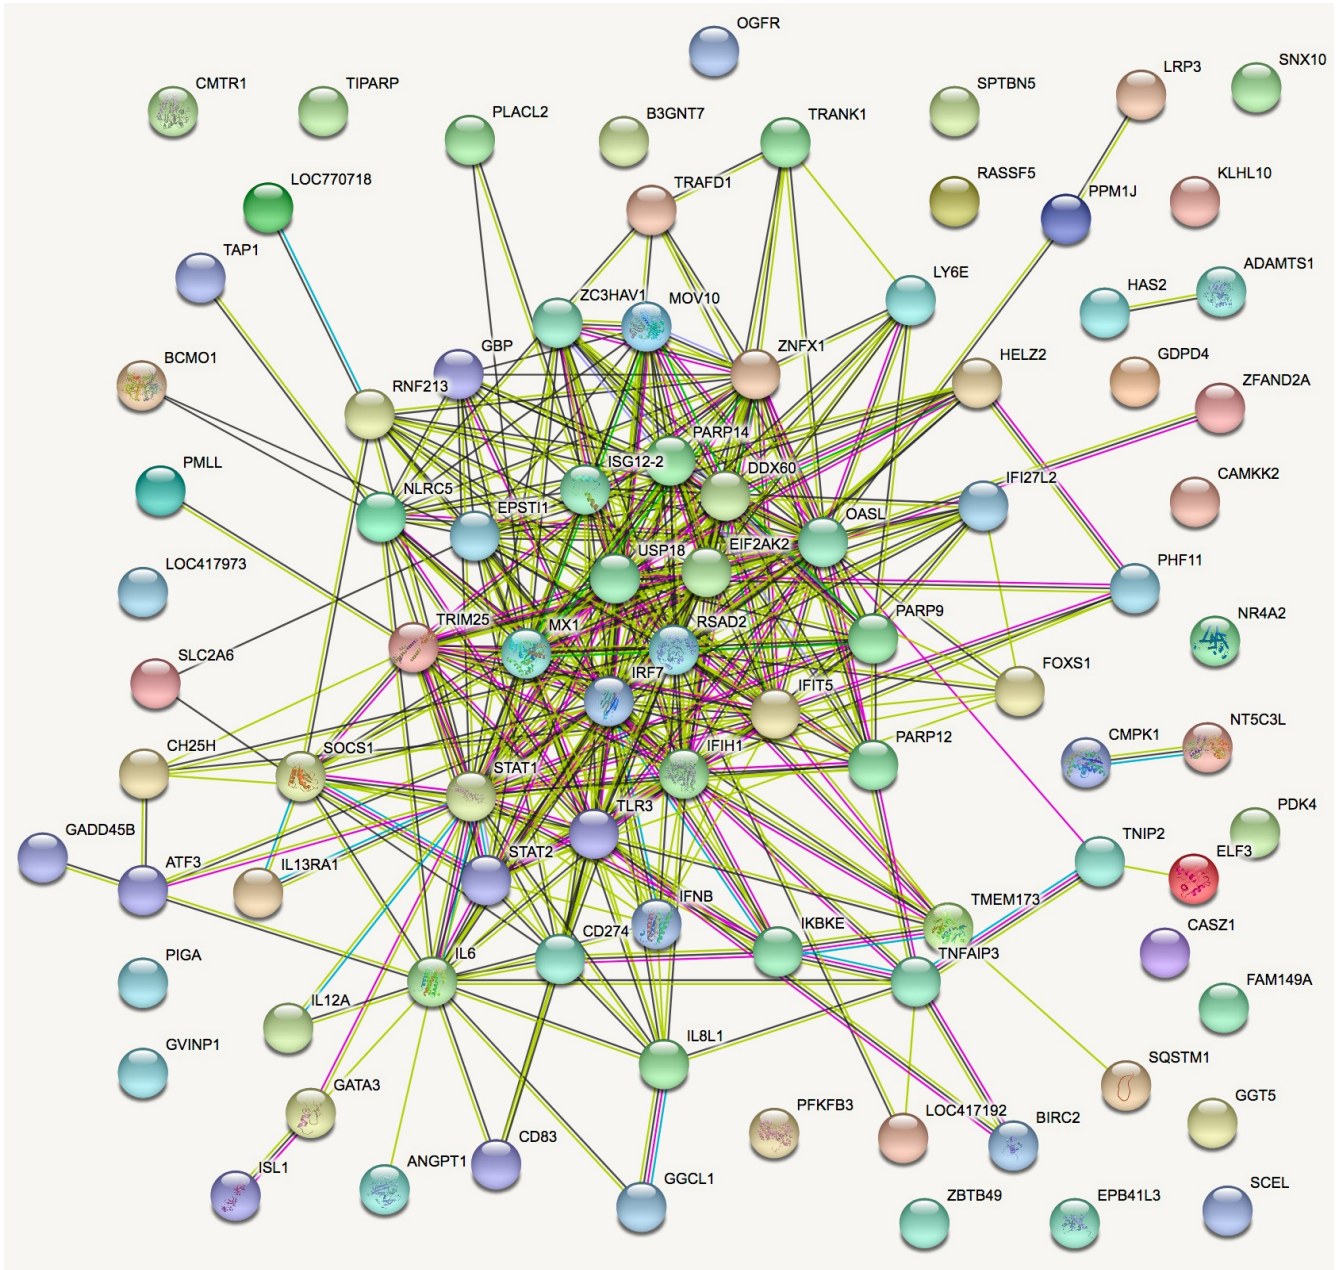

1201  
1202  
1203  
1204  
1205  
1206  
1207

1208  
1209  
1210  
1211  
1212

(E) Beaudette vs Mock downregulated translation

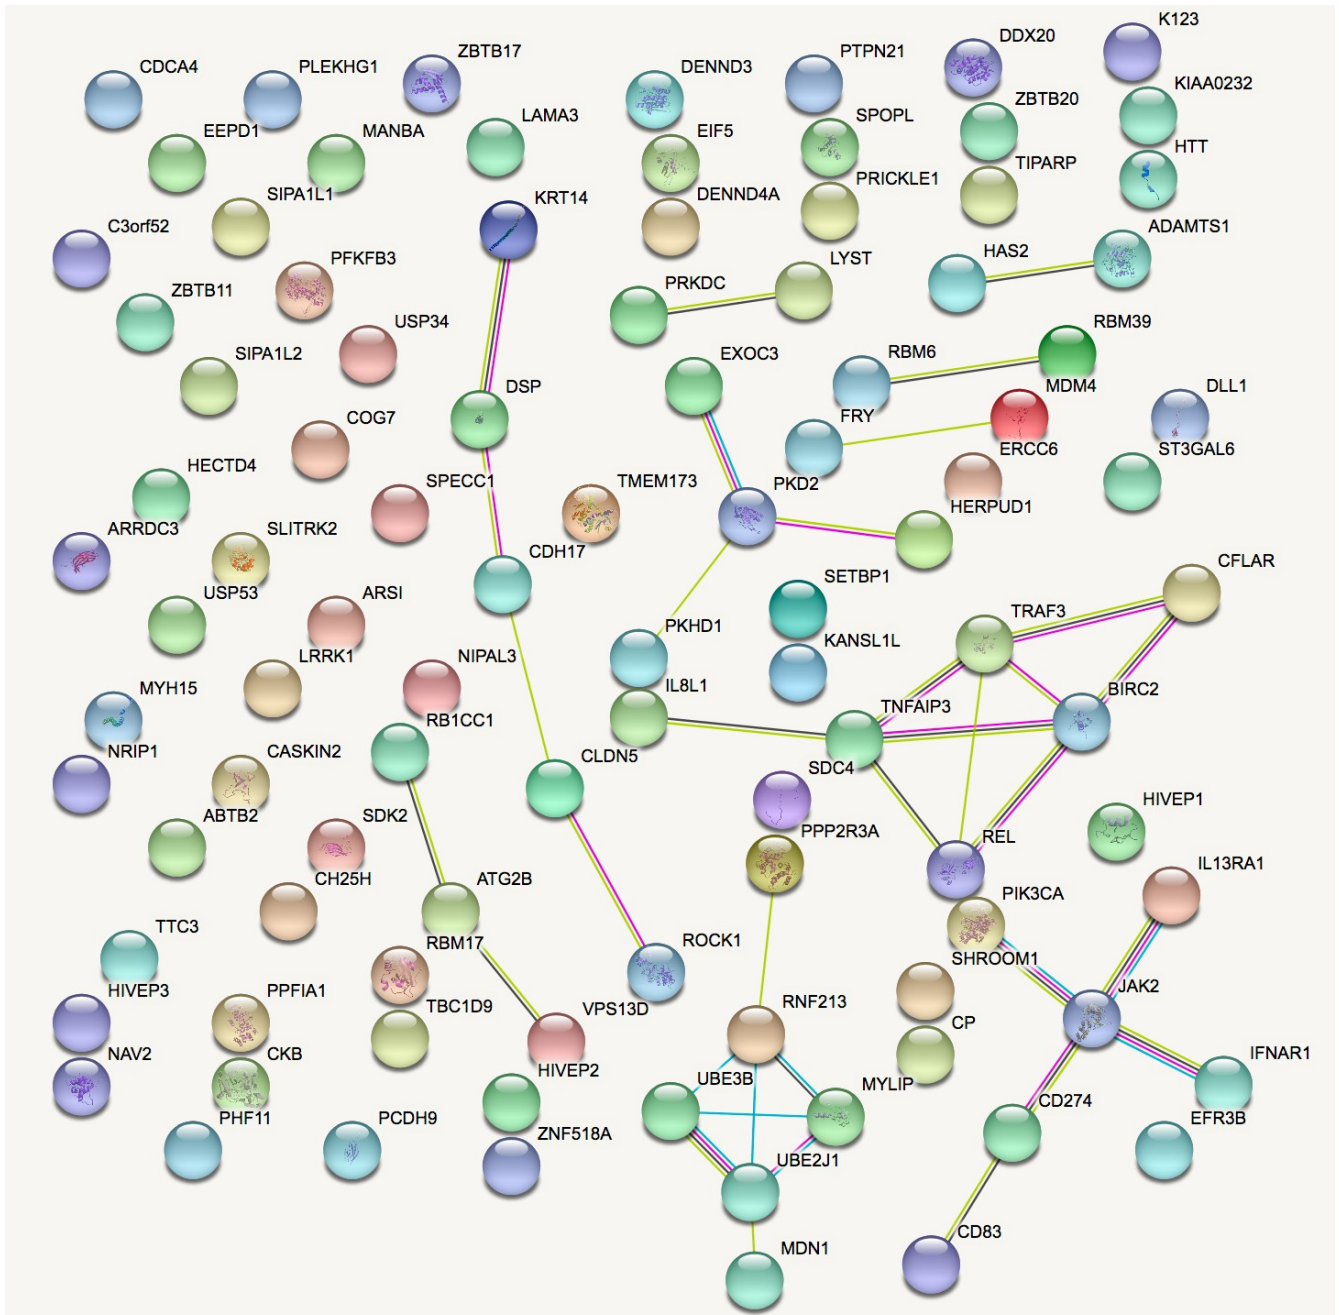

1214  
1215  
1216  
1217  
1218

1219  
1220  
1221  
1222  
1223  
1224

(F) M41 vs Mock downregulated translation

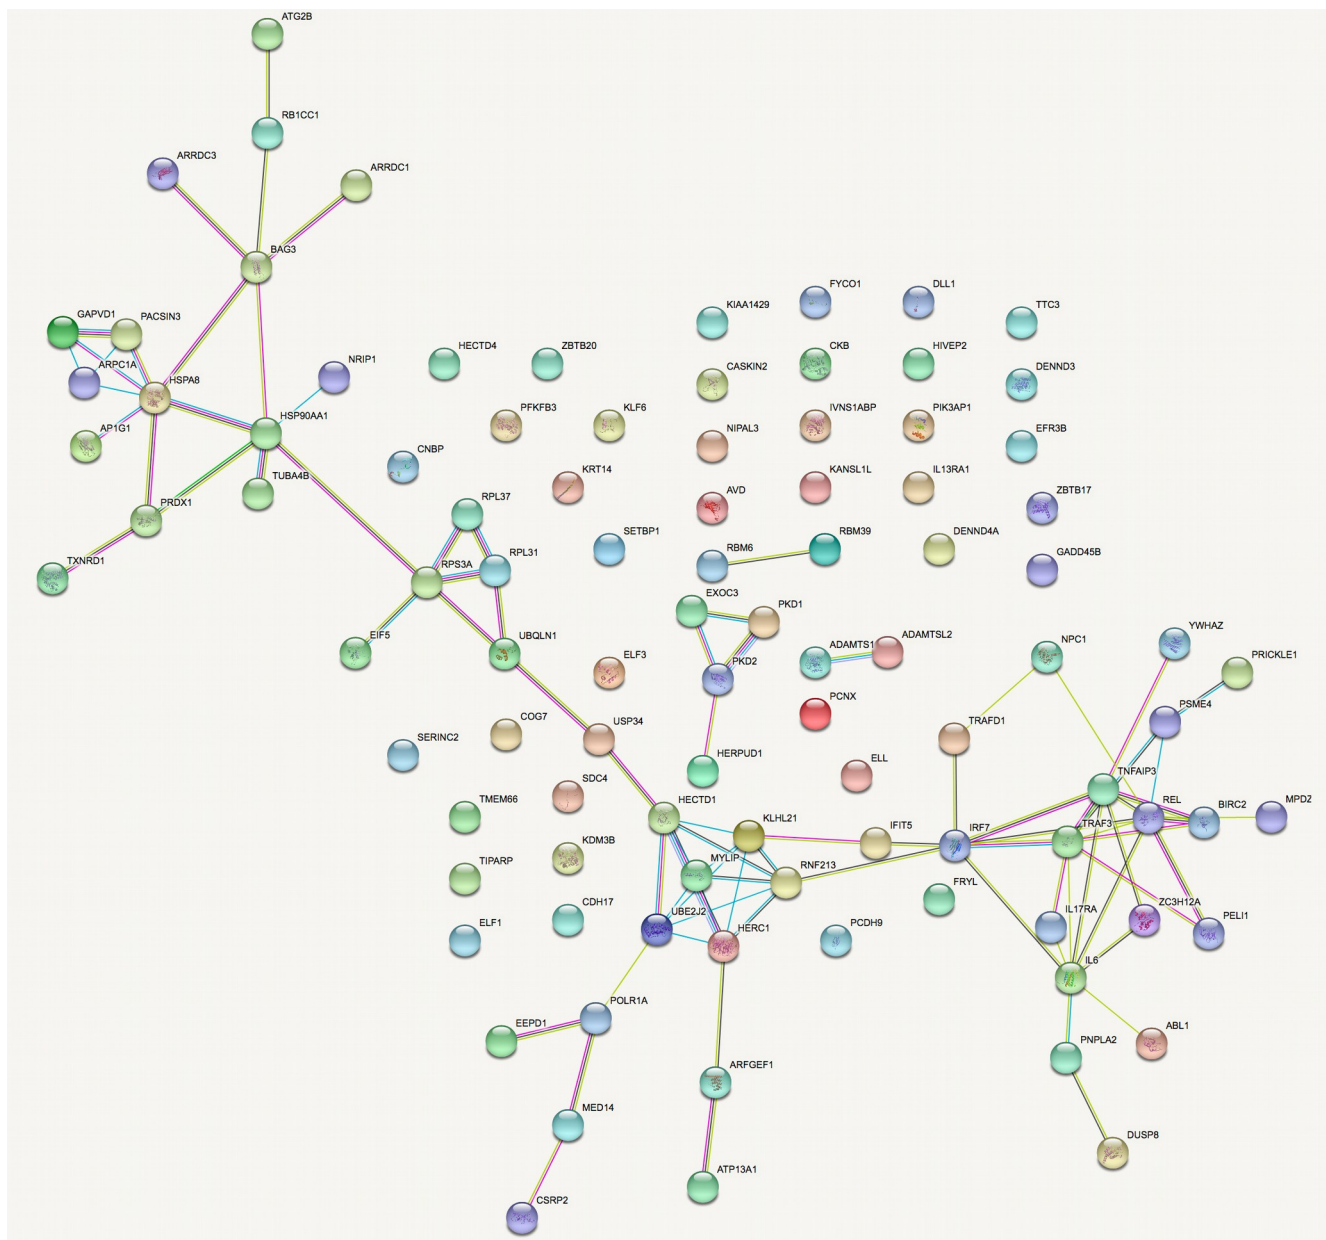

1226  
1227  
1228  
1229  
1230  
1231

1232  
1233  
1234  
1235  
1236  
1237  
1238

(G) Beaudette vs Mock upregulated translation

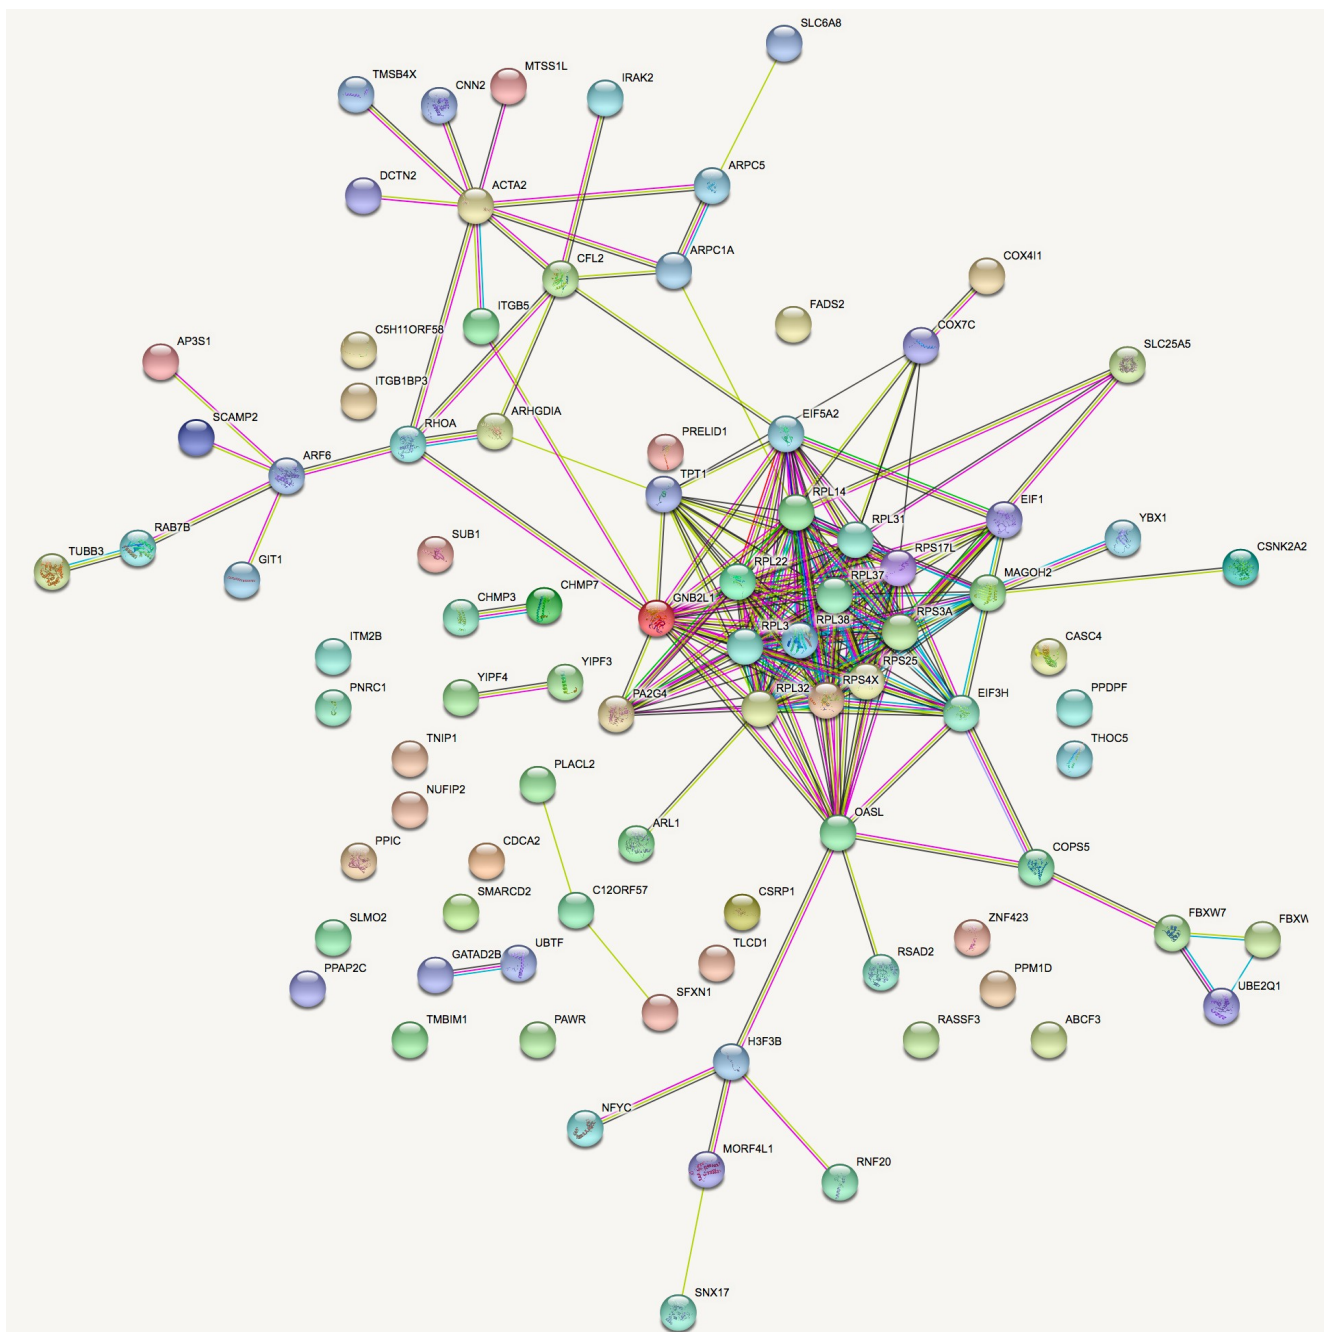

1240  
1241

1242  
1243  
1244  
1245  
1246  
1247  
1248  
1249

(H) M41 vs Mock upregulated translation

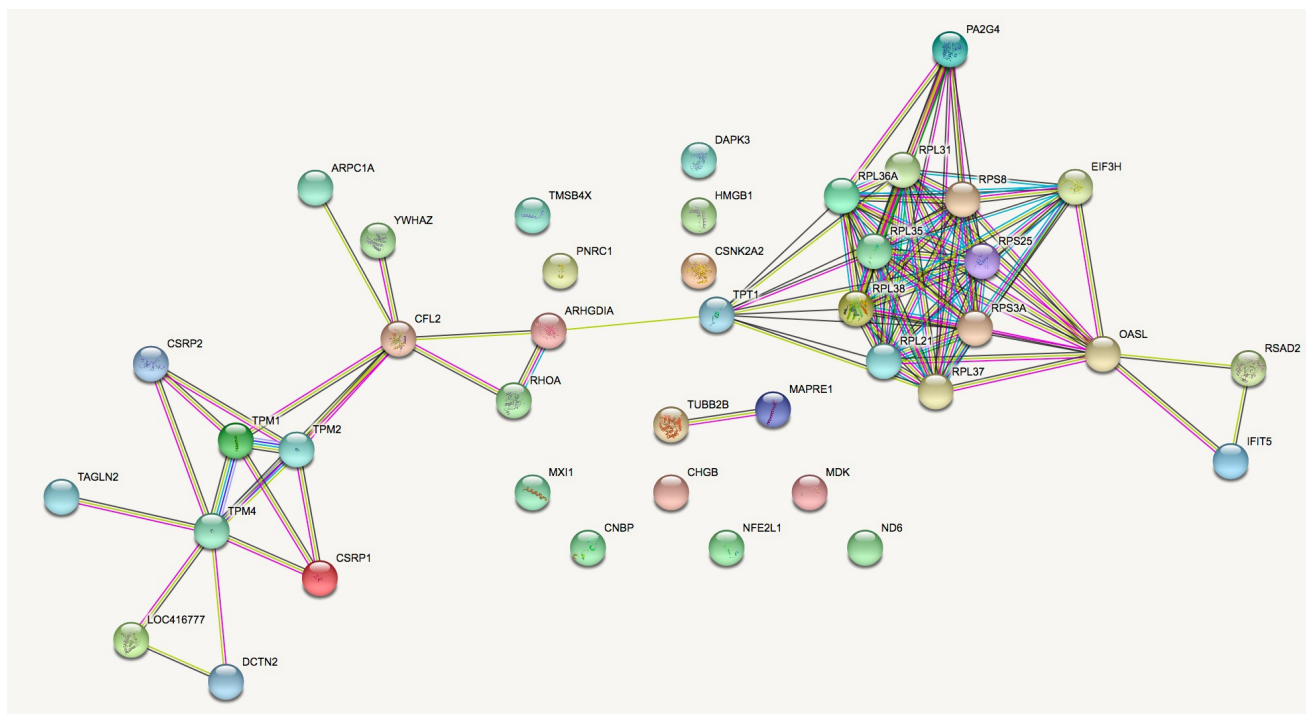

1251  
1252  
1253  
1254  
1255  
1256  
1257  
1258  
1259  
1260  
1261  
1262  
1263  
1264  
1265  
1266  
1267  
1268



1269  
1270  
1271  
1272  
1273  
1274  
1275  
1276  
1277

(I) M41 vs Beaudette downregulated transcripts

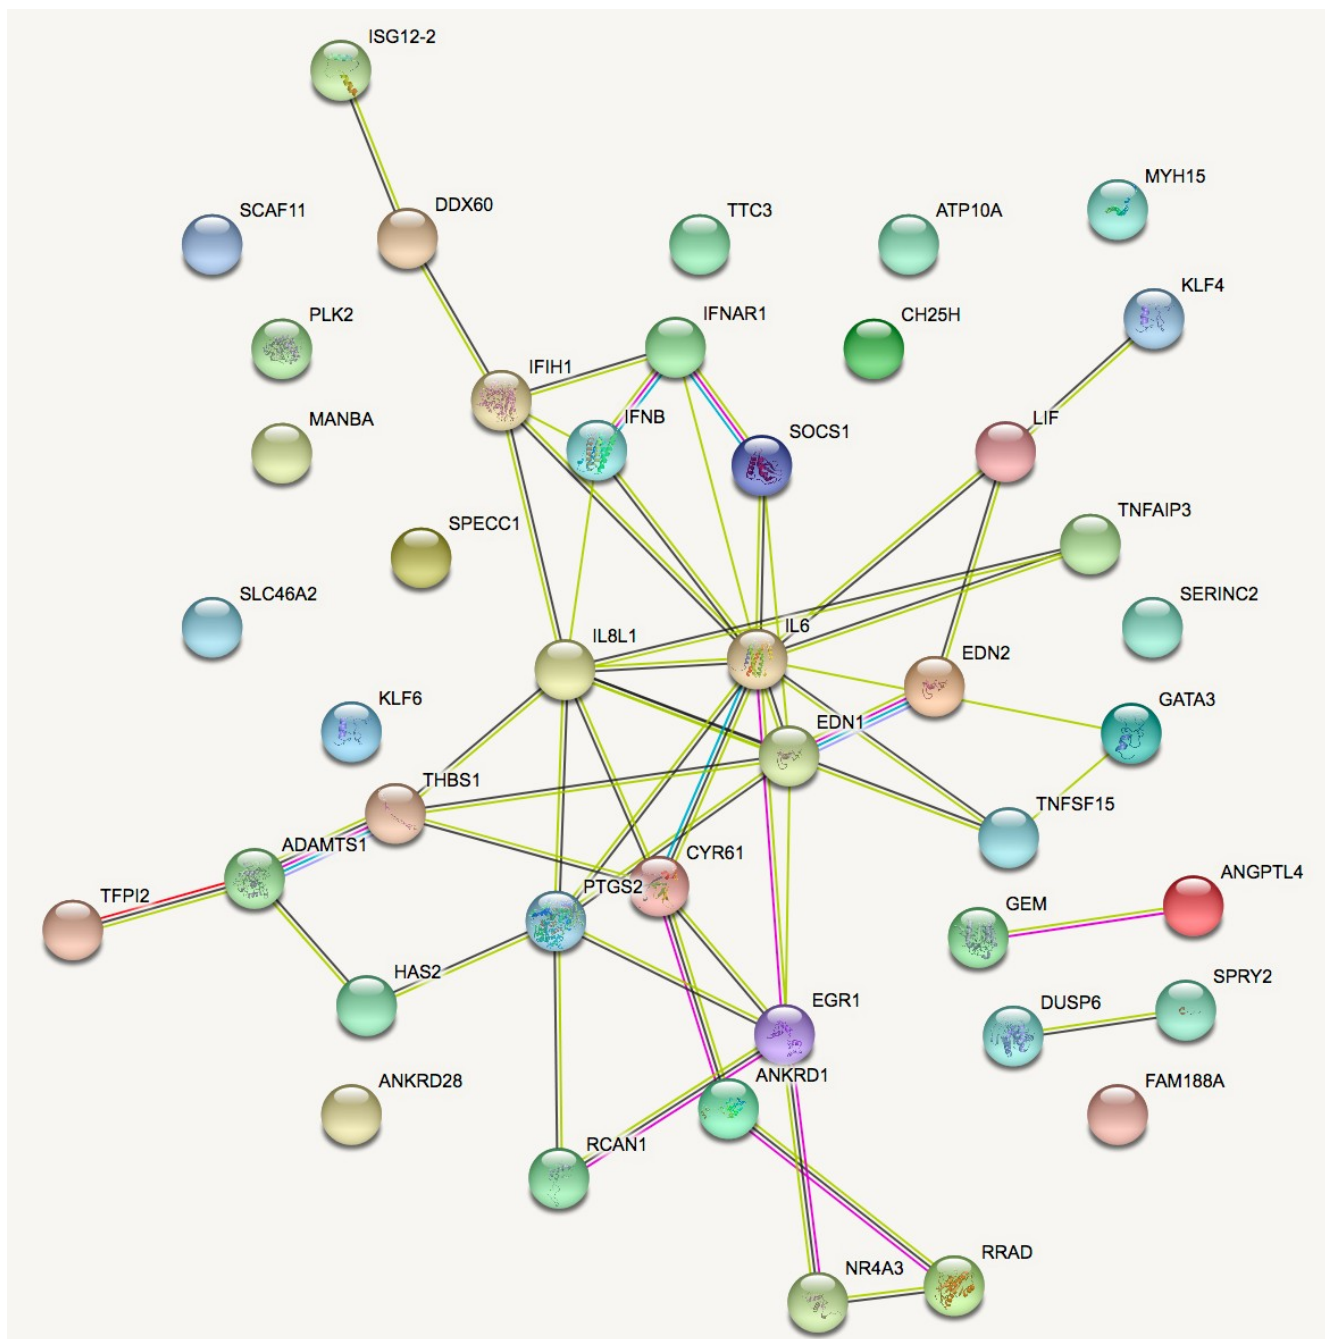

1279  
1280  
1281  
1282  
1283  
1284  
1285  
1286
